# Supplementary material for: Genome-Wide Identification and Expression Analysis of the R2R3-MYB Transcription Factor Family Revealed Their Potential Roles in the Flowering Process in Longan (Dimocarpus longan)
Source: Frontiers journal article supplement (doi:10.3389/fpls.2022.820439), 2022-03-25
Supplement: Data_Sheet_2.xls [file Data_Sheet_2.xls]

## Sheet: Table S1
Table S1. Characteristics of 119 longan R2R3-MYB genes
Gene ID	Gene Name	Subfamily	Chr	Start	End	aalen	MolWt	pI	Instability index	Hydrophilia	Predicted Localization
Dil.01g001450.1	DlMYB1	S5	Chr1	1134177	1135497	199	23176	10.47	51.11	-0.723	Nuclear
Dil.01g001460.1	DlMYB2	S5	Chr1	1141125	1143267	304	34707.8	5.55	47.64	-0.813	Nuclear
Dil.01g001470.1	DlMYB3	S5	Chr1	1157684	1159276	284	32235.3	6.33	78.7	-0.691	Nuclear
Dil.01g003150.1	DlMYB4	S6	Chr1	2504280	2505114	205	23835.9	9.18	52.02	-1.018	Nuclear
Dil.01g003190.1	DlMYB5	S5	Chr1	2546375	2547648	259	29542.7	8.93	77.22	-0.754	Nuclear
Dil.01g003200.1	DlMYB6	S5	Chr1	2555479	2556881	303	34075.5	5.56	43.72	-0.622	Nuclear
Dil.01g003210.1	DlMYB7	S5	Chr1	2572979	2574257	284	32125.8	6	53.36	-0.856	Nuclear
Dil.01g004190.1	DlMYB8	S14	Chr1	3307660	3309543	323	35446.5	6.79	47.12	-0.621	Nuclear
Dil.01g008340.1	DlMYB9	S5	Chr1	6770126	6774532	311	35128.1	5.35	53.67	-0.852	Nuclear
Dil.01g011140.1	DlMYB10	S15	Chr1	9705497	9706620	231	26933.4	8.82	67.18	-0.922	Nuclear
Dil.01g013170.1	DlMYB11	S25	Chr1	12537473	12539637	449	50769.2	7.05	43.99	-0.949	Nuclear
Dil.01g013560.1	DlMYB12	S14	Chr1	13017303	13018678	376	42118.8	6.26	56.8	-0.768	Nuclear
Dil.01g027080.1	DlMYB13	S2	Chr1	36059466	36061222	268	30207.9	5.76	60.29	-0.679	Nuclear
Dil.01g027880.1	DlMYB14	S17	Chr1	36931991	36933256	268	31214.1	9.11	65.27	-0.874	Nuclear
Dil.01g028020.1	DlMYB15	S17	Chr1	37224309	37225586	268	31214.1	9.11	65.27	-0.874	Nuclear
Dil.01g035440.1	DlMYB16	S20	Chr1	44221581	44223585	312	35399.3	6.13	51.25	-0.7	Nuclear
Dil.02g019190.1	DlMYB17	S11	Chr2	33208749	33210837	340	38216.8	6.61	59.12	-0.597	Nuclear
Dil.02g022740.1	DlMYB18	S18	Chr2	37383429	37384590	313	34729.8	9.97	59.13	-0.558	Nuclear
Dil.02g026310.1	DlMYB19	S26	Chr2	41014165	41015564	323	35699.2	7.6	36.79	-0.638	Nuclear
Dil.02g026520.1	DlMYB20	S26	Chr2	41247285	41248439	323	35715.2	7.6	37.71	-0.622	Nuclear
Dil.03g001010.1	DlMYB21	S2	Chr3	836615	837767	274	31094.8	6.43	55.97	-0.672	Nuclear
Dil.03g001500.1	DlMYB22	S5	Chr3	1240160	1241579	258	29533.2	6.55	49.76	-0.785	Nuclear
Dil.03g001510.1	DlMYB23	S5	Chr3	1293968	1299162	191	22382.6	10.6	66.6	-1.019	Nuclear
Dil.03g001540.1	DlMYB24	S6	Chr3	1311641	1312641	196	22797.8	8.66	63.48	-0.993	Nuclear
Dil.03g001770.1	DlMYB25	S6	Chr3	1547182	1548218	196	22797.8	8.66	63.48	-0.993	Nuclear
Dil.03g002760.1	DlMYB26	S13	Chr3	2514889	2516636	413	46101.5	6.23	72.31	-0.583	Nuclear
Dil.03g024290.1	DlMYB27	S2	Chr3	34945438	34946599	311	35229.8	5.12	54.76	-0.752	Nuclear
Dil.04g001260.1	DlMYB28	S27	Chr4	1002102	1003226	314	35590.9	5.25	65.63	-0.713	Nuclear
Dil.04g001310.1	DlMYB29	S27	Chr4	1040479	1041599	313	35447.7	5.33	65.65	-0.704	Nuclear
Dil.04g003980.1	DlMYB30	S9	Chr4	2870257	2872705	306	34046.4	6.11	64.38	-0.638	Nuclear
Dil.04g005810.2	DlMYB31	S2	Chr4	4214675	4216500	162	18797.6	9.69	46	-0.917	Nuclear
Dil.04g011620.1	DlMYB32	S7	Chr4	9430872	9433038	391	43656.4	4.91	47.58	-0.747	Nuclear
Dil.04g012460.1	DlMYB33	S20	Chr4	10051954	10053440	307	34731.3	5.77	54.22	-0.781	Nuclear
Dil.04g013360.1	DlMYB34	S13	Chr4	10901126	10903395	451	49984.5	6.73	59.58	-0.665	Nuclear
Dil.04g015690.1	DlMYB35	S28	Chr4	12750847	12752289	284	32203.1	8.86	43.49	-0.908	Nuclear
Dil.04g029230.1	DlMYB36	S22	Chr4	35818805	35819980	268	29718.1	8.66	53.78	-0.782	Nuclear
Dil.05g000460.1	DlMYB37	S13	Chr5	661161	663059	453	50471.7	6.92	46.01	-0.807	Nuclear
Dil.05g012930.1	DlMYB38	S10	Chr5	23053862	23054368	134	15691	9.82	42.55	-0.892	Nuclear
Dil.05g016520.1	DlMYB39	S1	Chr5	27393824	27395349	350	38953.2	6.8	44.88	-0.807	Nuclear
Dil.05g016600.1	DlMYB40	S21	Chr5	27505179	27507562	393	42825.9	9.16	44.67	-0.697	Nuclear
Dil.05g017290.1	DlMYB41	S28	Chr5	28161805	28164497	334	36767.9	6.31	40.61	-0.76	Nuclear
Dil.06g001770.1	DlMYB42	S12	Chr6	1424190	1424893	179	20793.8	8.94	46	-0.684	Nuclear
Dil.06g006770.2	DlMYB43	S22	Chr6	6052564	6054587	143	16278.4	9.02	43.73	-0.781	Nuclear
Dil.06g008360.1	DlMYB44	S14	Chr6	7680561	7682245	358	40204.1	5.75	50.46	-0.615	Nuclear
Dil.06g011210.1	DlMYB45	S4	Chr6	12082953	12084180	263	29835.8	9.37	50.61	-0.757	Nuclear
Dil.06g011270.1	DlMYB46	S4	Chr6	12246199	12247417	263	29819.8	9.45	51.84	-0.728	Nuclear
Dil.06g020760.1	DlMYB47	S24	Chr6	30958410	30959890	344	38036.9	6.55	58.74	-0.521	Nuclear
Dil.07g009490.1	DlMYB48	S13	Chr7	18511360	18512833	374	42419.2	5.57	57	-0.577	Nuclear
Dil.07g017900.1	DlMYB49	S11	Chr7	26802707	26804412	374	42892.6	5.66	46.48	-0.812	Nuclear
Dil.07g018010.1	DlMYB50	S2	Chr7	26901984	26903346	271	31384	5.79	50.98	-0.801	Nuclear
Dil.08g001020.1	DlMYB51	S8	Chr8	1222380	1224430	173	20081.4	9.78	74.39	-0.828	Nuclear
Dil.08g001740.1	DlMYB52	S6	Chr8	1998598	2002314	281	32250.4	7.64	44.09	-0.733	Nuclear
Dil.08g001750.1	DlMYB53	S6	Chr8	2017795	2022945	246	28152.3	10.05	43.86	-0.755	Nuclear
Dil.08g001760.1	DlMYB54	S6	Chr8	2043737	2046232	282	32307.6	9	40.15	-0.762	Nuclear
Dil.08g001770.1	DlMYB55	S6	Chr8	2055546	2063609	661	75808.2	6.33	52.74	-0.5	Nuclear
Dil.08g002130.1	DlMYB56	S4	Chr8	2498723	2500580	222	25196.5	7.1	37.33	-0.735	Nuclear
Dil.08g014150.1	DlMYB57	S8	Chr8	24962169	24963678	286	32796.1	5.26	50.31	-0.991	Nuclear
Dil.08g015750.1	DlMYB58	S16	Chr8	26478874	26481837	298	33591.7	6.27	46.71	-0.699	Nuclear
Dil.08g015770.1	DlMYB59	S9	Chr8	26488055	26489533	305	34169.8	5.89	46.88	-0.735	Nuclear
Dil.08g019300.1	DlMYB60	S3	Chr8	30228358	30231779	309	35665.2	6.1	52.89	-1.22	Nuclear
Dil.08g020010.1	DlMYB61	S13	Chr8	30864783	30866431	353	39857.7	6.21	60.09	-0.599	Nuclear
Dil.09g006390.1	DlMYB62	S24	Chr9	4788768	4790404	343	37992.8	5.77	48.9	-0.51	Nuclear
Dil.09g006410.1	DlMYB63	S24	Chr9	4818574	4819952	342	38051.1	7.13	42.67	-0.523	Nuclear
Dil.09g006470.1	DlMYB64	S24	Chr9	4863590	4865090	343	37992.8	5.77	48.9	-0.51	Nuclear
Dil.09g006490.1	DlMYB65	S24	Chr9	4890081	4891600	342	38051.1	7.13	42.67	-0.523	Nuclear
Dil.09g009110.1	DlMYB66	S14	Chr9	7740750	7742435	352	39806.6	6.41	56.12	-0.77	Nuclear
Dil.09g010800.1	DlMYB67	S22	Chr9	9399676	9401923	312	34140	8.32	57.27	-0.654	Nuclear
Dil.09g012320.1	DlMYB68	S22	Chr9	11243142	11244246	189	21611	10.27	63.2	-1.026	Nuclear
Dil.09g016170.1	DlMYB69	S21	Chr9	19881474	19883103	339	38332.4	9.16	54.27	-0.9	Nuclear
Dil.09g019990.1	DlMYB70	S4	Chr9	25706333	25707742	285	32208.3	8.84	53.73	-0.732	Nuclear
Dil.10g009380.1	DlMYB71	S4	Chr10	18140055	18142172	235	26851.4	9.06	56.53	-0.967	Nuclear
Dil.10g011020.1	DlMYB72	S20	Chr10	20000213	20001723	326	37131.3	5.87	53.77	-0.756	Nuclear
Dil.10g012030.1	DlMYB73	S9	Chr10	20905453	20907328	359	39992.1	6.52	48.07	-0.605	Nuclear
Dil.10g014520.1	DlMYB74	S21	Chr10	22776750	22779440	500	55686.6	6.02	54.28	-0.714	Nuclear
Dil.10g015060.1	DlMYB75	S25	Chr10	23205950	23211841	516	58504.4	8.83	59.13	-0.88	Nuclear
Dil.10g016910.1	DlMYB76	S15	Chr10	24791164	24792287	207	23788	7.14	45.48	-0.671	Nuclear
Dil.10g021960.1	DlMYB77	S16	Chr10	28421643	28424738	367	41321	6.04	57.84	-0.684	Nuclear
Dil.11g017840.1	DlMYB78	S22	Chr11	24516158	24517269	255	28127.3	8.53	44.77	-0.791	Nuclear
Dil.11g021760.1	DlMYB79	S4	Chr11	27660394	27661829	292	32450.6	9.02	48.16	-0.716	Nuclear
Dil.12g003640.1	DlMYB80	S18	Chr12	2622237	2624796	530	57302.3	5.98	56.51	-0.687	Nuclear
Dil.12g005130.1	DlMYB81	S2	Chr12	3811079	3813281	277	31223.7	5.72	54.12	-0.798	Nuclear
Dil.12g005140.1	DlMYB82	S2	Chr12	3831940	3833720	254	29246.6	5.84	55.57	-0.885	Nuclear
Dil.12g005190.1	DlMYB83	S11	Chr12	3876712	3878153	351	39488.2	5.62	47.99	-0.522	Nuclear
Dil.12g009920.1	DlMYB84	S8	Chr12	7201699	7203143	285	33122.8	5.25	45.41	-0.975	Nuclear
Dil.12g011130.1	DlMYB85	S25	Chr12	8075935	8078987	417	47372.3	5.93	43.57	-0.895	Nuclear
Dil.12g011140.1	DlMYB86	S25	Chr12	8083894	8087754	427	50027.2	9.81	58.11	-0.805	Nuclear
Dil.12g011220.1	DlMYB87	S19	Chr12	8175461	8178319	188	21745.4	6.43	64.88	-0.863	Nuclear
Dil.12g011380.1	DlMYB88	S15	Chr12	8342358	8344778	206	23655	8.94	50.83	-0.648	Nuclear
Dil.12g012160.1	DlMYB89	S10	Chr12	9023674	9024837	331	36962.4	6.06	37.44	-0.592	Nuclear
Dil.12g022300.1	DlMYB90	S18	Chr12	23112725	23116218	192	21652.6	9.39	53.43	-0.724	Nuclear
Dil.13g001590.1	DlMYB91	S25	Chr13	1114685	1116805	423	48422.9	8.85	48.26	-0.945	Nuclear
Dil.13g007520.1	DlMYB92	S14	Chr13	5878043	5880109	364	40814.2	7.02	51.44	-0.81	Nuclear
Dil.13g010640.1	DlMYB93	S28	Chr13	8886866	8888112	341	37820.1	7.15	48.78	-0.742	Nuclear
Dil.13g014250.1	DlMYB94	S16	Chr13	12908152	12910901	340	37954.5	6.42	66.15	-0.674	Nuclear
Dil.13g016120.1	DlMYB95	S18	Chr13	15516479	15519412	140	16197.5	10.01	68.5	-0.952	Nuclear
Dil.14g001000.1	DlMYB96	S26	Chr14	910378	912764	367	40730.4	6.04	54.9	-0.608	Nuclear
Dil.14g004030.1	DlMYB97	S23	Chr14	3252419	3255063	396	42941.2	6.77	39.59	-0.54	Nuclear
Dil.14g005230.1	DlMYB98	S27	Chr14	4012713	4016445	353	40881.8	9.5	59.48	-0.943	Nuclear
Dil.14g008020.1	DlMYB99	S14	Chr14	6316463	6318580	339	37657	8.25	51.53	-0.676	Nuclear
Dil.14g008230.1	DlMYB100	S17	Chr14	6497815	6499297	140	16405	9.97	62.9	-0.846	Nuclear
Dil.14g014450.1	DlMYB101	S27	Chr14	12830907	12832496	382	43716.8	8.9	65.51	-0.805	Nuclear
Dil.14g015070.1	DlMYB102	S17	Chr14	13729572	13730655	250	29092.7	9.03	58.68	-0.964	Nuclear
Dil.14g017610.1	DlMYB103	S9	Chr14	16726989	16729275	414	45261	6.64	52.4	-0.748	Nuclear
Dil.14g017800.1	DlMYB104	S21	Chr14	17085135	17087442	474	53058.4	6.57	52.74	-0.784	Nuclear
Dil.14g018400.1	DlMYB105	S1	Chr14	17999430	18001134	339	37898	6.42	59.9	-0.83	Nuclear
Dil.15g002360.1	DlMYB106	S28	Chr15	1716746	1717657	253	28917.6	9.2	54.88	-0.838	Nuclear
Dil.15g002370.1	DlMYB107	S28	Chr15	1738779	1740029	260	30468.4	8.42	44.31	-0.937	Nuclear
Dil.15g003650.1	DlMYB108	S13	Chr15	2637981	2640050	141	16379.6	9.68	55.65	-0.917	Nuclear
Dil.15g005450.1	DlMYB109	S26	Chr15	3810256	3812030	382	42489.3	5.7	51.35	-0.66	Nuclear
Dil.15g006420.1	DlMYB110	S15	Chr15	4497395	4499670	220	25476.5	7.01	35.62	-0.827	Nuclear
Dil.15g006590.1	DlMYB111	S25	Chr15	4739752	4741104	287	33123.1	8.88	50.91	-0.966	Nuclear
Dil.15g007070.1	DlMYB112	S13	Chr15	5096999	5098782	369	41802.4	5.72	52.21	-0.663	Nuclear
Dil.15g009820.1	DlMYB113	S6	Chr15	7334490	7335527	202	23716.9	8.34	57.84	-0.8	Nuclear
Dil.15g010740.1	DlMYB114	S8	Chr15	8228662	8230584	271	30202.8	5.05	53.07	-0.633	Nuclear
Dil.15g013880.1	DlMYB115	S4	Chr15	11155632	11157359	195	21873.8	8.87	36.95	-0.777	Nuclear
Dil.15g015010.1	DlMYB116	S20	Chr15	12311428	12313258	297	34410.4	6.18	61.08	-0.773	Nuclear
Dil.15g018030.1	DlMYB117	S1	Chr15	15888896	15890485	328	36663.7	6.4	49.63	-0.78	Nuclear
Dil.15g018520.1	DlMYB118	S21	Chr15	16706958	16709415	249	28992.4	9.14	56.92	-0.929	Nuclear
Dil.15g018960.1	DlMYB119	S14	Chr15	17726761	17728577	360	40514.4	5.74	53.73	-0.59	Nuclear

## Sheet: Table S2
Table S2. List of primer sequences used for PCR and qRT-PCR analysis of selected DlMYB genes
No.	Name	Gene Identifier	Orientation	Primer Sequence (5'->3')	Purpose
1	DlMYB16	Dil.01g035440.1	F	CAGTCACCTGCAAAACAACATGGAAGTCAAAGGAAGAAT	PCR
			R	CAGTCACCTGCAAAATACACATGTTGTTGAATTGCTGCT
2	DlMYB72	Dil.10g011020.1	F	CAGTGGTCTCACAACATGAGATCAGCTAATAAGTC	PCR
			R	CAGTGGTCTCATACACTCCCTAAACTGCCATATGT
3	DlMYB116	Dil.15g015010.1	F	CAGTGGTCTCACAACATGTCTTCTAATAGTAGTAC	PCR
			R	CAGTGGTCTCATACAGGCTCCCCAGCTTTCCTGCC
4	DlMYB16	Dil.01g035440.1	F	GTCAAAAATCGCCCAACACT	qRT-PCR
			R	TTCTACCAACCTTGGCATCC
5	DlMYB17	Dil.02g019190.1	F	GGCTACGATCTGCAGGAGAC	qRT-PCR
			R	TTCAGTGCCACCATTGACAT
6	DlMYB19	Dil.02g026310.1	F	CTGCGGTGGACAAATTACCT	qRT-PCR
			R	TGACATCATTGTCGGTTCGT
7	DlMYB20	Dil.02g026520.1	F	CTGCGGTGGACAAATTACCT	qRT-PCR
			R	TGACATCATTGTCGGTTCGT
8	DlMYB35	Dil.04g015690.1	F	CCATCTCCCAAAGCCTGTTA	qRT-PCR
			R	CACCCGTGAAAACCTGAGAT
9	DlMYB72	Dil.10g011020.1	F	CCGGTGCTTTTTCTTCAGAG	qRT-PCR
			R	TGTCACGGGAGCTCCTAGAT
10	DlMYB78	Dil.11g017840.1	F	CTGAGGAAGACGACGAGAGG	qRT-PCR
			R	ACCCAAAGTGAGTTCGGTTG
11	DlMYB116	Dil.15g015010.1	F	TGGCCCAATTTCAGGACTAC	qRT-PCR
			R	TTTTCTTCCATCTGGCAACC
12	Dlactin	Dil.06g016430.1	F	GGAGCTGAGAGATTCCGTTG	qRT-PCR
			R	TTGATCTTCATGCTGCTTGG

## Sheet: Table S3
Table S3. The predicted nuclear localization signal (NLS) for 119 longan R2R3-MYB proteins
Gene ID	Gene Name	Predicted nuclear localization signal	Start	End
Dil.01g001450.1	DlMYB1	WRNLPKKAGLKRCGKS	37	52
		KQRKQHNKSSKSP	128	140
Dil.01g001460.1	DlMYB2	LRKRLKGDHDKKRMPQHESKKN	112	133
Dil.01g001470.1	DlMYB3	LSKRLKRDGKSTLLQYQSKK	112	131
Dil.01g003150.1	DlMYB4	HGPKKWKSVAAKS	35	47
		HLSKKIKHNEKQSKGSMAK	117	135
Dil.01g003190.1	DlMYB5	LKKKMRGDQPGESKQSKAGKKKNVIKTP	111	138
Dil.01g003200.1	DlMYB6	SKKAQAEQSKRSKLDKK	113	129
Dil.01g003210.1	DlMYB7	GKWRNLPKRAGLKRCGK	35	51
		GKKAKARSSENS	113	124
Dil.01g004190.1	DlMYB8	KLKKKLLAGKVNLKNKATRNK	112	132
Dil.01g008340.1	DlMYB9	GKWSNVAKKTG	35	45
Dil.01g011140.1	DlMYB10	KREKNKGKRGLWKPEED	4	20
Dil.01g013170.1	DlMYB11	IKNHWNATKRKQNSKKKNKPSSKKQKPNS	219	247
Dil.01g013560.1	DlMYB12	KNYWNTRLKKKLLGRRKQSN	106	125
Dil.01g027080.1	DlMYB13	KNVWHTHLKKRLKQNQSNSDTKK	105	127
Dil.01g027880.1	DlMYB14	WRTHFKKKIKMSADNSDKAKTNRLMK	116	141
Dil.01g028020.1	DlMYB15	WRTHFKKKIKMSADNSDKAKTNRLMK	116	141
Dil.01g035440.1	DlMYB16	GLKRTGKSCRLR	58	69
		RTRVQKHAK	122	130
Dil.02g019190.1	DlMYB17	HGRWRILPKNAGLKR	38	52
Dil.02g022740.1	DlMYB18	TRVKRRQRQ	135	143
Dil.02g026310.1	DlMYB19	KNHWNTKLKKRLSGMG	105	120
Dil.02g026520.1	DlMYB20	KNHWNTKLKKRLSGMG	105	120
Dil.03g001010.1	DlMYB21	RKGKWSPEE	17	25
		PKASGLLRSGKSCRLRWMNYLRPGIK	45	70
Dil.03g001500.1	DlMYB22	AKKAGLKRSGKSCRLR	40	55
Dil.03g001510.1	DlMYB23	KWRNLPKRAGLKR	59	71
Dil.03g001540.1	DlMYB24	KKIKQKSENKQIGVSTKEKTIEKR	110	133
Dil.03g001770.1	DlMYB25	KKIKQKSENKQIGVSTKEKTIEKR	110	133
Dil.03g002760.1	DlMYB26	KHLPGRTDNEVKNFWNSSIKKKL	84	116
Dil.03g024290.1	DlMYB27	KKTNLRKGS	11	19
		RWMNYLRPGIKRG	67	79
Dil.04g001260.1	DlMYB28	REEIRKGPWKQEEDEVLINHVKKYGPRDWSSIRSKG	5	40
Dil.04g001310.1	DlMYB29	REEIRKGPWKQEEDEVLINHVKKYGPRDWSSIRSKG	5	40
Dil.04g003980.1	DlMYB30	KKGLKKGPWTPE	9	20
Dil.04g005810.2	DlMYB31	THLKKRLK	110	117
Dil.04g011620.1	DlMYB32	TTKRKGGRTSRWAMKKNKAYITTKK	140	164
Dil.04g012460.1	DlMYB33	LKRTGKSCRLR	57	67
Dil.04g013360.1	DlMYB34	LWNSCLKKKLRQRGIDPVTHKPLS	107	130
Dil.04g015690.1	DlMYB35	DSRKKRTTKNNNNKKKQNYNKS	135	156
Dil.04g029230.1	DlMYB36	RRKRAAEFSSASSESNSVRKRERER	123	147
Dil.05g000460.1	DlMYB37	SSIKKKLRQRGIDPNTHK	110	127
Dil.05g012930.1	DlMYB38	RLPGRTDNEIKNYWNTHLKKKL	97	118
Dil.05g016520.1	DlMYB39	IKNYWNTHLKKKLKKFQSSLDPHG	104	127
Dil.05g016600.1	DlMYB40	MARKQREQSSIYRRRKPATGP	215	235
Dil.05g017290.1	DlMYB41	EGRWRTLPKRAGLLRCGKSCRLRWMNYLRPSVKRGRI	43	79
Dil.06g001770.1	DlMYB42	LRNHYWRKIKPKL	96	108
Dil.06g006770.2	DlMYB43	KHGPRNWSLISKSIPGRSGK	30	49
Dil.06g008360.1	DlMYB44	TRLKKKLLGKQRKEQAAAK	111	129
Dil.06g011210.1	DlMYB45	RLPGRTDNEIKNYWNTHIKRKLYSRGI	95	121
Dil.06g011270.1	DlMYB46	RLPGRTDNEIKNYWNTHIKRKLYSRGI	95	121
Dil.06g020760.1	DlMYB47	RPDIKRGK	62	69
Dil.07g009490.1	DlMYB48	KVKRGLWSP	10	18
		RPDLKRG	61	67
		RWAQIAKHLPGRTDNEVKNFWNSCIKKKL	87	115
Dil.07g017900.1	DlMYB49	LRPDIKRGR	61	69
		RLPGRTDNEIKNYWNTHIRKRLLR	95	118
Dil.07g018010.1	DlMYB50	SGKSCRLRWMNYLKPGIKRG	53	72
Dil.08g001020.1	DlMYB51	NTHIKKKLRK	109	118
Dil.08g001740.1	DlMYB52	RLPGRTANDIKNYWNTHLRKKAVASKQES	104	132
Dil.08g001750.1	DlMYB53	IEKRPEKREAKRRKTSQKAI	6	25
Dil.08g001760.1	DlMYB54	AQLRKKAVVSKQE	108	120
Dil.08g001770.1	DlMYB55	THLRKKAVASK	119	129
		RHLKKR	367	372
Dil.08g002130.1	DlMYB56	LRKKLIKMGI	111	120
Dil.08g014150.1	DlMYB57	AARLPGRTDNEIKNHWNTHIKKKLIK	93	118
Dil.08g015750.1	DlMYB58	SEKPKPKHKKGLWSPEEDQRLR	6	27
Dil.08g015770.1	DlMYB59	TRLKKR	111	116
Dil.08g019300.1	DlMYB60	HLKKKIKPNPD	113	123
		SREKRRVETEELDDENQWDNCHMPKKPRKS	146	175
Dil.08g020010.1	DlMYB61	KVKKG	10	14
Dil.09g006390.1	DlMYB62	RPDIKRGK	62	67
Dil.09g006410.1	DlMYB63	GLKKGPW	17	23
Dil.09g006470.1	DlMYB64	RPDIKRGK	62	69
Dil.09g006490.1	DlMYB65	GLKKGPW	17	23
Dil.09g009110.1	DlMYB66	RLKKKLLGKQRKEHQARRVSNN	112	133
Dil.09g010800.1	DlMYB67	KSIPGRSGK	40	48
Dil.09g012320.1	DlMYB68	SQKAERIKGP	32	41
		RYIKGRSGK	67	75
		KNHWNSTLKRRA	129	140
Dil.09g016170.1	DlMYB69	RKQRE	117	121
Dil.09g019990.1	DlMYB70	NTHIKRKLISR	109	119
Dil.10g009380.1	DlMYB71	GRKTNANPPMKPRR	149	162
		EEEKKKLFKNNNDRQPK	203	219
Dil.10g011020.1	DlMYB72	KRTGKS	58	63
Dil.10g012030.1	DlMYB73	HLKKRLTKMGIDPVTHKPK	111	129
Dil.10g014520.1	DlMYB74	ARKYREQSSAYRRRKMSH	285	302
Dil.10g015060.1	DlMYB75	GASSKASKREVRGVNKRMQETKKKK	18	42
Dil.10g016910.1	DlMYB76	HLCKKLGIKKQKKAVISSK	106	124
Dil.10g021960.1	DlMYB77	LKKRLK	126	131
Dil.11g017840.1	DlMYB78	GKLVRRHGARNWSLISKAIRGRSGKS	17	42
		LKRKHAGSVAEAAASEEDDERVAYQERKRPR	102	133
Dil.11g021760.1	DlMYB79	HIRRKLLNR	111	119
Dil.12g003640.1	DlMYB80	TRMKRRQRAG	121	130
Dil.12g005130.1	DlMYB81	LRWMNYLRPNIKRGNYSK	55	72
		KNHWHTNLKKRL	105	116
		NSKPKPSQVTASK	145	157
Dil.12g005140.1	DlMYB82	TRLKKLMKKNSAS	110	122
Dil.12g005190.1	DlMYB83	HIRKRL	111	116
Dil.12g009920.1	DlMYB84	KNHWNTRIKKRLKQ	105	118
Dil.12g011130.1	DlMYB85	KNHWNATKRRHNVSRHKT	285	302
Dil.12g011140.1	DlMYB86	RHKNPYPPLKLKRKA	349	363
Dil.12g011220.1	DlMYB87	KAAGLKRTGKSCRLRWLNYLRPDVKRG	43	69
		AKWGNRWSKIAKHLPGRTDNEIKNYWRTR	84	112
Dil.12g011380.1	DlMYB88	VKVHGKGQWNRIAKKTGLKRCGKSCR	30	55
		AKRVPGR	94	100
Dil.12g012160.1	DlMYB89	RPDIKRGK	63	70
Dil.12g022300.1	DlMYB90	KNYWNTRIKRRQR	129	141
Dil.13g001590.1	DlMYB91	KKIPRRTENSIKNHWNATKRRLNSKRKIKPL	181	211
Dil.13g007520.1	DlMYB92	KLKKKLMALAPPPQRKPP	112	129
Dil.13g010640.1	DlMYB93	KKEGEGRWRTLPKRAGLL	44	61
Dil.13g014250.1	DlMYB94	IKNFWNSTIKKRLKS	111	125
Dil.13g016120.1	DlMYB95	RNGLKKG	11	17
Dil.14g001000.1	DlMYB96	VKNYWNTKLRKKLSKMG	115	131
Dil.14g004030.1	DlMYB97	SRSGGGGGGRDRVKGP	49	64
		AIKNHWNSTLRRRGKR	150	165
Dil.14g005230.1	DlMYB98	NKWKKIAAEVPGRTAKRLGKWWEVFKEKK	79	107
Dil.14g008020.1	DlMYB99	TKLKKKLMGMVNNSTCHRK	111	129
Dil.14g008230.1	DlMYB100	KKRGNKWSGIARSLPGGTENKIKNYWRSHLKR	86	117
Dil.14g014450.1	DlMYB101	KWKKIASEVPGRTAKRLGK	81	99
		LESEKARKRREKMEDIEAKIR	291	311
Dil.14g015070.1	DlMYB102	RTHFRKKEKSSQKQEKRKAQLLKRK	113	137
Dil.14g017610.1	DlMYB103	THLKKRLAKMGIDPVTHKPK	110	129
Dil.14g017800.1	DlMYB104	RKYREQSSAYRRRKLTQV	281	298
Dil.14g018400.1	DlMYB105	HLKKKLEKLQTGSEK	111	125
Dil.15g002360.1	DlMYB106	KISTDSKKKKNIKTTPENANK	129	149
Dil.15g002370.1	DlMYB107	KRFKKTTSSGRSKSLKEKKKN	114	134
Dil.15g003650.1	DlMYB108	NSWIKKKINRKPA	109	121
Dil.15g005450.1	DlMYB109	AVPKKAGLRR	39	48
Dil.15g006420.1	DlMYB110	SKKFGTRTRKGKRK	108	121
Dil.15g006590.1	DlMYB111	IHSSSKKTLKGGKK	80	93
		IKNHWNATKRRQFSKRKCRSK	187	207
Dil.15g007070.1	DlMYB112	LKKKLMK	112	117
Dil.15g009820.1	DlMYB113	AKKVMHR	11	17
		GARRWKT	36	42
Dil.15g010740.1	DlMYB114	WSKIAARLPGRTDNEIKNHWNTHIKKKLLK	89	118
Dil.15g013880.1	DlMYB115	HLKRKL	110	115
		NKSLAKAK	133	140
Dil.15g015010.1	DlMYB116	AKRSGLKRTGKSCRLR	50	65
Dil.15g018030.1	DlMYB117	WNTHLKKKLKKLQTGV	108	123
Dil.15g018520.1	DlMYB118	RRCRERSRLFAKRAA	103	117
Dil.15g018960.1	DlMYB119	RLKKKLLGKQRKEATAKR	112	129

## Sheet: Table S4
Table S4. Detailed information for the 20 motifs of 119 longan R2R3-MYB proteins
Motif	Length	Best possible match
1	40	RCGKSCRLRWLNYLRPDIKRGNFSEEEEELIIRLHALLGN
2	29	RWSLIAGRLPGRTDNEIKNYWNTHLKKKL
3	21	KKGPWTPEEDXKLIXYIQKHG
4	11	NWRALPKKAGL
5	175	QAVRLQAEAVQLAKIQYLQCLLQSAASMSTATPYDQNGITDMEALNLLNSIPALKENPVLNSSQTGNSTLAALFSQLEIATSQPLHHPGLLSHLPPQQVPFNFQTLFNNEMGQPPIDFAMVSQGANDHPPDFSWILPSPPTDLPSLTDHDQTSMSNPGDASSPSSYGGGTSSYWP
6	11	MGRSPCCDKXG
7	15	IQMGIDPVTHKPLSD
8	29	RCGKSCRLRWLNYLRPNIKRGNFTEEEED
9	71	TSTTQNTQKINVIKPQPRTFSKKTSAWVNAKITAEENSRDHLGHPNLCKASSSTSLDTPDNNEMIMCWERL
10	158	MAEIATTLAPPQVAHLAEAALGCFKDEMLHLLTKKRIDFQLQQSGPGLGNTTNTYIKTDGKDDTIEKIKFNLSKAIQEPEMIPTSKPWDPAGTMSANFAGGCSAFPASFSGFQYGPSSFGNDGAASPWSQSMCTGSTCTAGEQQGRLHDRVEDDHGEE
11	149	TTTTNPNVQYYPFGVSFSLDQLYENSISMLASSTSMNFMNSNACRLEDTQYNIIGAGPNLFQGIDNNFAVEQSDLIYNNHQRLDIDGLESLYGMEMVNGSTGTSSAESTSWEDISSLVYHPTVVSDYEICQQSIPQDSTFEQASYFGHQ
12	113	RQQFHQQQQQQQQQQEQQQQIMQLNQLDMKKIMFLLDENEHRSPYLPQPRQEMVSTNLYPHATDQEQQGFFNYAMSSSNGSASVSAETSNEDILWDGLWNLDDFQANFGGACA
13	113	EDNELGNNNNQCTGEAQLQLSFPQVLPQPQQDMTLSPGSQELLSRFGDPYFFDVFGPVDDCIELAAVAQPFLKPPVSSGDGGKDGSENPDAFFDDFPADMFDQIEPLPSPSDW
14	113	IKRTHTINNFGLKNSLQVVPEFVRNDNIIRIGSSRAAETSGEDSNSSSVVTTEEAVVAYPRLNLELSIGLPHQRPPPQPSTTVCLRCNLGGFPNRQLPCRCTSTPPDKLYRYC
15	158	TNATADTGPTSNTPTSFALSEDHVPSNQFNYHLPELSESTTVMDEYYSQPLIPETYDEELVFMQNFFANNNQNQPSNVENDIHDHNNEDHKNFDHDHDHNMSIRGLQVEHGFTHQSSHLYSDLYLSNLLNGPTSSPHFDCLCINLDMSLQLGDHDHHH
16	70	RELKNIGISSKEKIIEKHKFVEEEGSGFEKISKEENKSCSGDDEEEEEKSEKCILFNIDEFFDFIKEDPL
17	44	MSNFWAEKSPLRTTFAGCTGFEVNQNCLDKHHDIDFDADLWNLL
18	11	NWSLIAEKLPG
19	25	NLRHMAQWESARLEAEARLSRESKL
20	57	MAPGFLNQTTPYWPDLPLIMPFINQQQFDPNFKDQESLKNLLIKLGGRSVADYHDPQ

## Sheet: Table S5
Table S5. Cis-element prediction of longan R2R3-MYB genes
Gene	Cis-element	Sequence			Strand	Organism	Function
DlMYB10	TGA-element	AACGAC	995	6	+	Brassica oleracea	auxin-responsive
DlMYB105	TGA-element	AACGAC	502	6	+	Brassica oleracea	auxin-responsive
DlMYB110	TGA-element	AACGAC	571	6	+	Brassica oleracea	auxin-responsive
DlMYB110	TGA-element	AACGAC	888	6	-	Brassica oleracea	auxin-responsive
DlMYB113	TGA-element	AACGAC	1521	6	-	Brassica oleracea	auxin-responsive
DlMYB116	TGA-element	AACGAC	1925	6	+	Brassica oleracea	auxin-responsive
DlMYB17	TGA-element	AACGAC	1673	6	-	Brassica oleracea	auxin-responsive
DlMYB22	TGA-element	AACGAC	142	6	-	Brassica oleracea	auxin-responsive
DlMYB25	TGA-element	AACGAC	813	6	+	Brassica oleracea	auxin-responsive
DlMYB26	TGA-element	AACGAC	191	6	-	Brassica oleracea	auxin-responsive
DlMYB26	TGA-element	AACGAC	884	6	-	Brassica oleracea	auxin-responsive
DlMYB32	TGA-element	AACGAC	260	6	-	Brassica oleracea	auxin-responsive
DlMYB36	TGA-element	AACGAC	1846	6	-	Brassica oleracea	auxin-responsive
DlMYB37	TGA-element	AACGAC	437	6	-	Brassica oleracea	auxin-responsive
DlMYB4	TGA-element	AACGAC	1557	6	+	Brassica oleracea	auxin-responsive
DlMYB45	TGA-element	AACGAC	1389	6	+	Brassica oleracea	auxin-responsive
DlMYB46	TGA-element	AACGAC	1389	6	+	Brassica oleracea	auxin-responsive
DlMYB49	TGA-element	AACGAC	31	6	-	Brassica oleracea	auxin-responsive
DlMYB5	TGA-element	AACGAC	1110	6	+	Brassica oleracea	auxin-responsive
DlMYB52	TGA-element	AACGAC	504	6	-	Brassica oleracea	auxin-responsive
DlMYB54	TGA-element	AACGAC	1674	6	-	Brassica oleracea	auxin-responsive
DlMYB55	TGA-element	AACGAC	214	6	+	Brassica oleracea	auxin-responsive
DlMYB55	TGA-element	AACGAC	1745	6	-	Brassica oleracea	auxin-responsive
DlMYB56	TGA-element	AACGAC	108	6	+	Brassica oleracea	auxin-responsive
DlMYB57	TGA-element	AACGAC	40	6	-	Brassica oleracea	auxin-responsive
DlMYB58	TGA-element	AACGAC	1502	6	+	Brassica oleracea	auxin-responsive
DlMYB6	TGA-element	AACGAC	744	6	-	Brassica oleracea	auxin-responsive
DlMYB6	TGA-element	AACGAC	1090	6	-	Brassica oleracea	auxin-responsive
DlMYB67	TGA-element	AACGAC	439	6	+	Brassica oleracea	auxin-responsive
DlMYB67	TGA-element	AACGAC	999	6	+	Brassica oleracea	auxin-responsive
DlMYB67	TGA-element	AACGAC	1234	6	-	Brassica oleracea	auxin-responsive
DlMYB67	TGA-element	AACGAC	1321	6	-	Brassica oleracea	auxin-responsive
DlMYB68	TGA-element	AACGAC	560	6	+	Brassica oleracea	auxin-responsive
DlMYB7	TGA-element	AACGAC	138	6	-	Brassica oleracea	auxin-responsive
DlMYB71	TGA-element	AACGAC	301	6	+	Brassica oleracea	auxin-responsive
DlMYB76	TGA-element	AACGAC	1166	6	+	Brassica oleracea	auxin-responsive
DlMYB81	TGA-element	AACGAC	1631	6	-	Brassica oleracea	auxin-responsive
DlMYB81	TGA-element	AACGAC	1644	6	-	Brassica oleracea	auxin-responsive
DlMYB84	TGA-element	AACGAC	916	6	+	Brassica oleracea	auxin-responsive
DlMYB84	TGA-element	AACGAC	929	6	+	Brassica oleracea	auxin-responsive
DlMYB84	TGA-element	AACGAC	1492	6	+	Brassica oleracea	auxin-responsive
DlMYB87	TGA-element	AACGAC	996	6	+	Brassica oleracea	auxin-responsive
DlMYB9	TGA-element	AACGAC	1713	6	-	Brassica oleracea	auxin-responsive
DlMYB92	TGA-element	AACGAC	429	6	-	Brassica oleracea	auxin-responsive
DlMYB94	TGA-element	AACGAC	591	6	-	Brassica oleracea	auxin-responsive
DlMYB97	TGA-element	AACGAC	927	6	+	Brassica oleracea	auxin-responsive
DlMYB98	TGA-element	AACGAC	1165	6	-	Brassica oleracea	auxin-responsive
DlMYB99	TGA-element	AACGAC	1828	6	-	Brassica oleracea	auxin-responsive
DlMYB10	AuxRR-core	GGTCCAT	70	7	-	Nicotiana tabacum	auxin-responsive
DlMYB10	AuxRR-core	GGTCCAT	403	7	-	Nicotiana tabacum	auxin-responsive
DlMYB106	AuxRR-core	GGTCCAT	1267	7	-	Nicotiana tabacum	auxin-responsive
DlMYB108	AuxRR-core	GGTCCAT	1790	7	-	Nicotiana tabacum	auxin-responsive
DlMYB110	AuxRR-core	GGTCCAT	49	7	-	Nicotiana tabacum	auxin-responsive
DlMYB113	AuxRR-core	GGTCCAT	678	7	-	Nicotiana tabacum	auxin-responsive
DlMYB119	AuxRR-core	GGTCCAT	1485	7	+	Nicotiana tabacum	auxin-responsive
DlMYB16	AuxRR-core	GGTCCAT	947	7	+	Nicotiana tabacum	auxin-responsive
DlMYB2	AuxRR-core	GGTCCAT	394	7	-	Nicotiana tabacum	auxin-responsive
DlMYB2	AuxRR-core	GGTCCAT	1327	7	-	Nicotiana tabacum	auxin-responsive
DlMYB23	AuxRR-core	GGTCCAT	1446	7	-	Nicotiana tabacum	auxin-responsive
DlMYB37	AuxRR-core	GGTCCAT	1687	7	-	Nicotiana tabacum	auxin-responsive
DlMYB39	AuxRR-core	GGTCCAT	1934	7	+	Nicotiana tabacum	auxin-responsive
DlMYB42	AuxRR-core	GGTCCAT	908	7	+	Nicotiana tabacum	auxin-responsive
DlMYB44	AuxRR-core	GGTCCAT	1462	7	+	Nicotiana tabacum	auxin-responsive
DlMYB44	AuxRR-core	GGTCCAT	1592	7	+	Nicotiana tabacum	auxin-responsive
DlMYB57	AuxRR-core	GGTCCAT	351	7	+	Nicotiana tabacum	auxin-responsive
DlMYB57	AuxRR-core	GGTCCAT	963	7	-	Nicotiana tabacum	auxin-responsive
DlMYB74	AuxRR-core	GGTCCAT	969	7	-	Nicotiana tabacum	auxin-responsive
DlMYB76	AuxRR-core	GGTCCAT	1345	7	+	Nicotiana tabacum	auxin-responsive
DlMYB81	AuxRR-core	GGTCCAT	1708	7	-	Nicotiana tabacum	auxin-responsive
DlMYB9	AuxRR-core	GGTCCAT	1760	7	+	Nicotiana tabacum	auxin-responsive
DlMYB90	AuxRR-core	GGTCCAT	1717	7	+	Nicotiana tabacum	auxin-responsive
DlMYB96	AuxRR-core	GGTCCAT	317	7	-	Nicotiana tabacum	auxin-responsive
DlMYB3	TGA-box	TGACGTAA	69	8	+	Glycine max	auxin-responsive
DlMYB41	TGA-box	TGACGTAA	74	8	+	Glycine max	auxin-responsive
DlMYB44	AuxRE	TGTCTCAATAAG	92	11	+	Glycine max	auxin-responsive
DlMYB7	TGA-box	TGACGTAA	1844	8	+	Glycine max	auxin-responsive
DlMYB84	AuxRE	TGTCTCAATAAG	1686	11	+	Glycine max	auxin-responsive
DlMYB94	TGA-box	TGACGTAA	896	8	-	Glycine max	auxin-responsive
DlMYB10	TC-rich repeats	ATTCTCTAAC	1309	9	+	Nicotiana tabacum	defense and stress responsive
DlMYB10	TC-rich repeats	ATTCTCTAAC	1613	9	-	Nicotiana tabacum	defense and stress responsive
DlMYB101	TC-rich repeats	GTTTTCTTAC	13	9	-	Nicotiana tabacum	defense and stress responsive
DlMYB105	TC-rich repeats	GTTTTCTTAC	607	9	-	Nicotiana tabacum	defense and stress responsive
DlMYB105	TC-rich repeats	ATTCTCTAAC	1822	9	+	Nicotiana tabacum	defense and stress responsive
DlMYB106	TC-rich repeats	GTTTTCTTAC	10	9	-	Nicotiana tabacum	defense and stress responsive
DlMYB106	TC-rich repeats	GTTTTCTTAC	1710	9	+	Nicotiana tabacum	defense and stress responsive
DlMYB108	TC-rich repeats	GTTTTCTTAC	1733	9	-	Nicotiana tabacum	defense and stress responsive
DlMYB109	TC-rich repeats	ATTCTCTAAC	1087	9	-	Nicotiana tabacum	defense and stress responsive
DlMYB11	TC-rich repeats	GTTTTCTTAC	476	9	-	Nicotiana tabacum	defense and stress responsive
DlMYB110	TC-rich repeats	GTTTTCTTAC	1680	10	+	Nicotiana tabacum	defense and stress responsive
DlMYB115	TC-rich repeats	ATTCTCTAAC	1024	9	-	Nicotiana tabacum	defense and stress responsive
DlMYB115	TC-rich repeats	GTTTTCTTAC	1635	9	+	Nicotiana tabacum	defense and stress responsive
DlMYB117	TC-rich repeats	ATTCTCTAAC	1051	9	-	Nicotiana tabacum	defense and stress responsive
DlMYB118	TC-rich repeats	GTTTTCTTAC	918	9	+	Nicotiana tabacum	defense and stress responsive
DlMYB118	TC-rich repeats	ATTCTCTAAC	1700	9	+	Nicotiana tabacum	defense and stress responsive
DlMYB119	TC-rich repeats	GTTTTCTTAC	424	9	-	Nicotiana tabacum	defense and stress responsive
DlMYB21	TC-rich repeats	ATTCTCTAAC	1115	9	+	Nicotiana tabacum	defense and stress responsive
DlMYB27	TC-rich repeats	GTTTTCTTAC	1349	9	-	Nicotiana tabacum	defense and stress responsive
DlMYB28	TC-rich repeats	GTTTTCTTAC	360	9	-	Nicotiana tabacum	defense and stress responsive
DlMYB29	TC-rich repeats	GTTTTCTTAC	530	9	-	Nicotiana tabacum	defense and stress responsive
DlMYB3	TC-rich repeats	GTTTTCTTAC	822	9	+	Nicotiana tabacum	defense and stress responsive
DlMYB30	TC-rich repeats	ATTCTCTAAC	68	9	-	Nicotiana tabacum	defense and stress responsive
DlMYB31	TC-rich repeats	GTTTTCTTAC	354	9	+	Nicotiana tabacum	defense and stress responsive
DlMYB40	TC-rich repeats	ATTCTCTAAC	1688	9	-	Nicotiana tabacum	defense and stress responsive
DlMYB48	TC-rich repeats	GTTTTCTTAC	1200	9	+	Nicotiana tabacum	defense and stress responsive
DlMYB5	TC-rich repeats	GTTTTCTTAC	977	9	-	Nicotiana tabacum	defense and stress responsive
DlMYB50	TC-rich repeats	ATTCTCTAAC	349	9	-	Nicotiana tabacum	defense and stress responsive
DlMYB54	TC-rich repeats	GTTTTCTTAC	1137	9	-	Nicotiana tabacum	defense and stress responsive
DlMYB55	TC-rich repeats	ATTCTCTAAC	1436	9	-	Nicotiana tabacum	defense and stress responsive
DlMYB56	TC-rich repeats	GTTTTCTTAC	1027	9	-	Nicotiana tabacum	defense and stress responsive
DlMYB60	TC-rich repeats	ATTCTCTAAC	1944	9	+	Nicotiana tabacum	defense and stress responsive
DlMYB62	TC-rich repeats	ATTCTCTAAC	1575	9	+	Nicotiana tabacum	defense and stress responsive
DlMYB64	TC-rich repeats	ATTCTCTAAC	1576	9	+	Nicotiana tabacum	defense and stress responsive
DlMYB67	TC-rich repeats	ATTCTCTAAC	561	9	+	Nicotiana tabacum	defense and stress responsive
DlMYB7	TC-rich repeats	ATTCTCTAAC	380	9	-	Nicotiana tabacum	defense and stress responsive
DlMYB70	TC-rich repeats	GTTTTCTTAC	567	9	+	Nicotiana tabacum	defense and stress responsive
DlMYB70	TC-rich repeats	GTTTTCTTAC	1797	9	+	Nicotiana tabacum	defense and stress responsive
DlMYB70	TC-rich repeats	GTTTTCTTAC	1980	9	-	Nicotiana tabacum	defense and stress responsive
DlMYB73	TC-rich repeats	ATTCTCTAAC	1143	9	+	Nicotiana tabacum	defense and stress responsive
DlMYB76	TC-rich repeats	ATTCTCTAAC	243	9	-	Nicotiana tabacum	defense and stress responsive
DlMYB78	TC-rich repeats	ATTCTCTAAC	365	9	-	Nicotiana tabacum	defense and stress responsive
DlMYB8	TC-rich repeats	ATTCTCTAAC	235	9	+	Nicotiana tabacum	defense and stress responsive
DlMYB8	TC-rich repeats	GTTTTCTTAC	525	9	-	Nicotiana tabacum	defense and stress responsive
DlMYB80	TC-rich repeats	GTTTTCTTAC	17	9	+	Nicotiana tabacum	defense and stress responsive
DlMYB80	TC-rich repeats	ATTCTCTAAC	55	9	-	Nicotiana tabacum	defense and stress responsive
DlMYB80	TC-rich repeats	GTTTTCTTAC	85	9	+	Nicotiana tabacum	defense and stress responsive
DlMYB80	TC-rich repeats	GTTTTCTTAC	809	9	-	Nicotiana tabacum	defense and stress responsive
DlMYB81	TC-rich repeats	ATTCTCTAAC	861	9	-	Nicotiana tabacum	defense and stress responsive
DlMYB82	TC-rich repeats	GTTTTCTTAC	611	9	-	Nicotiana tabacum	defense and stress responsive
DlMYB83	TC-rich repeats	GTTTTCTTAC	1599	9	+	Nicotiana tabacum	defense and stress responsive
DlMYB84	TC-rich repeats	ATTCTCTAAC	494	9	+	Nicotiana tabacum	defense and stress responsive
DlMYB89	TC-rich repeats	GTTTTCTTAC	856	9	-	Nicotiana tabacum	defense and stress responsive
DlMYB97	TC-rich repeats	ATTCTCTAAC	1857	9	-	Nicotiana tabacum	defense and stress responsive
DlMYB97	TC-rich repeats	GTTTTCTTAC	1963	9	-	Nicotiana tabacum	defense and stress responsive
DlMYB98	TC-rich repeats	GTTTTCTTAC	887	9	+	Nicotiana tabacum	defense and stress responsive
DlMYB99	TC-rich repeats	GTTTTCTTAC	73	9	+	Nicotiana tabacum	defense and stress responsive
DlMYB103	TATC-box	TATCCCA	863	7	-	Oryza sativa	gibberellin-responsive
DlMYB111	TATC-box	TATCCCA	461	7	+	Oryza sativa	gibberellin-responsive
DlMYB13	TATC-box	TATCCCA	1058	7	+	Oryza sativa	gibberellin-responsive
DlMYB19	TATC-box	TATCCCA	779	7	-	Oryza sativa	gibberellin-responsive
DlMYB20	TATC-box	TATCCCA	803	7	-	Oryza sativa	gibberellin-responsive
DlMYB22	TATC-box	TATCCCA	1361	7	+	Oryza sativa	gibberellin-responsive
DlMYB27	TATC-box	TATCCCA	491	7	-	Oryza sativa	gibberellin-responsive
DlMYB40	TATC-box	TATCCCA	395	7	+	Oryza sativa	gibberellin-responsive
DlMYB40	TATC-box	TATCCCA	1077	7	+	Oryza sativa	gibberellin-responsive
DlMYB41	TATC-box	TATCCCA	1636	7	-	Oryza sativa	gibberellin-responsive
DlMYB49	TATC-box	TATCCCA	419	7	+	Oryza sativa	gibberellin-responsive
DlMYB5	TATC-box	TATCCCA	1098	7	+	Oryza sativa	gibberellin-responsive
DlMYB57	TATC-box	TATCCCA	265	7	-	Oryza sativa	gibberellin-responsive
DlMYB6	TATC-box	TATCCCA	1911	7	+	Oryza sativa	gibberellin-responsive
DlMYB75	TATC-box	TATCCCA	226	7	+	Oryza sativa	gibberellin-responsive
DlMYB77	TATC-box	TATCCCA	854	7	-	Oryza sativa	gibberellin-responsive
DlMYB97	TATC-box	TATCCCA	1131	7	+	Oryza sativa	gibberellin-responsive
DlMYB100	P-box	CCTTTTG	1907	7	+	Oryza sativa	gibberellin-responsive
DlMYB102	P-box	CCTTTTG	17	7	+	Oryza sativa	gibberellin-responsive
DlMYB104	P-box	CCTTTTG	624	7	+	Oryza sativa	gibberellin-responsive
DlMYB107	GARE-motif	TCTGTTG	1394	7	-	Brassica oleracea	gibberellin-responsive
DlMYB109	P-box	CCTTTTG	824	7	+	Oryza sativa	gibberellin-responsive
DlMYB109	P-box	CCTTTTG	1989	7	-	Oryza sativa	gibberellin-responsive
DlMYB110	GARE-motif	TCTGTTG	1750	7	+	Brassica oleracea	gibberellin-responsive
DlMYB111	P-box	CCTTTTG	82	7	-	Oryza sativa	gibberellin-responsive
DlMYB111	P-box	CCTTTTG	1899	7	+	Oryza sativa	gibberellin-responsive
DlMYB112	P-box	CCTTTTG	1110	7	+	Oryza sativa	gibberellin-responsive
DlMYB113	P-box	CCTTTTG	1757	7	+	Oryza sativa	gibberellin-responsive
DlMYB114	GARE-motif	TCTGTTG	1040	7	+	Brassica oleracea	gibberellin-responsive
DlMYB114	P-box	CCTTTTG	232	7	+	Oryza sativa	gibberellin-responsive
DlMYB118	P-box	CCTTTTG	1945	7	+	Oryza sativa	gibberellin-responsive
DlMYB119	GARE-motif	TCTGTTG	366	7	-	Brassica oleracea	gibberellin-responsive
DlMYB119	GARE-motif	TCTGTTG	798	7	+	Brassica oleracea	gibberellin-responsive
DlMYB12	GARE-motif	TCTGTTG	1539	7	-	Brassica oleracea	gibberellin-responsive
DlMYB13	P-box	CCTTTTG	1393	7	+	Oryza sativa	gibberellin-responsive
DlMYB14	P-box	CCTTTTG	897	7	+	Oryza sativa	gibberellin-responsive
DlMYB14	P-box	CCTTTTG	1245	7	-	Oryza sativa	gibberellin-responsive
DlMYB15	P-box	CCTTTTG	897	7	+	Oryza sativa	gibberellin-responsive
DlMYB15	P-box	CCTTTTG	1245	7	-	Oryza sativa	gibberellin-responsive
DlMYB17	P-box	CCTTTTG	743	7	-	Oryza sativa	gibberellin-responsive
DlMYB18	P-box	CCTTTTG	560	7	+	Oryza sativa	gibberellin-responsive
DlMYB18	P-box	CCTTTTG	1723	7	-	Oryza sativa	gibberellin-responsive
DlMYB22	P-box	CCTTTTG	263	7	-	Oryza sativa	gibberellin-responsive
DlMYB22	P-box	CCTTTTG	1828	7	+	Oryza sativa	gibberellin-responsive
DlMYB23	P-box	CCTTTTG	922	7	+	Oryza sativa	gibberellin-responsive
DlMYB24	P-box	CCTTTTG	841	7	-	Oryza sativa	gibberellin-responsive
DlMYB25	P-box	CCTTTTG	845	7	-	Oryza sativa	gibberellin-responsive
DlMYB26	GARE-motif	TCTGTTG	1865	7	+	Brassica oleracea	gibberellin-responsive
DlMYB26	P-box	CCTTTTG	327	7	-	Oryza sativa	gibberellin-responsive
DlMYB27	GARE-motif	TCTGTTG	1965	7	-	Brassica oleracea	gibberellin-responsive
DlMYB27	P-box	CCTTTTG	1277	7	-	Oryza sativa	gibberellin-responsive
DlMYB28	P-box	CCTTTTG	1322	7	-	Oryza sativa	gibberellin-responsive
DlMYB29	P-box	CCTTTTG	1475	7	-	Oryza sativa	gibberellin-responsive
DlMYB3	GARE-motif	TCTGTTG	634	7	-	Brassica oleracea	gibberellin-responsive
DlMYB3	GARE-motif	TCTGTTG	1950	7	-	Brassica oleracea	gibberellin-responsive
DlMYB33	GARE-motif	TCTGTTG	282	7	+	Brassica oleracea	gibberellin-responsive
DlMYB34	GARE-motif	TCTGTTG	1388	7	+	Brassica oleracea	gibberellin-responsive
DlMYB36	P-box	CCTTTTG	577	7	+	Oryza sativa	gibberellin-responsive
DlMYB4	P-box	CCTTTTG	1606	7	+	Oryza sativa	gibberellin-responsive
DlMYB40	GARE-motif	TCTGTTG	632	7	-	Brassica oleracea	gibberellin-responsive
DlMYB43	GARE-motif	TCTGTTG	1720	7	-	Brassica oleracea	gibberellin-responsive
DlMYB47	GARE-motif	TCTGTTG	1883	7	-	Brassica oleracea	gibberellin-responsive
DlMYB49	P-box	CCTTTTG	1809	7	+	Oryza sativa	gibberellin-responsive
DlMYB51	P-box	CCTTTTG	974	7	-	Oryza sativa	gibberellin-responsive
DlMYB55	GARE-motif	TCTGTTG	1810	7	+	Brassica oleracea	gibberellin-responsive
DlMYB55	P-box	CCTTTTG	920	7	+	Oryza sativa	gibberellin-responsive
DlMYB56	P-box	CCTTTTG	115	7	-	Oryza sativa	gibberellin-responsive
DlMYB56	P-box	CCTTTTG	1507	7	-	Oryza sativa	gibberellin-responsive
DlMYB58	P-box	CCTTTTG	291	7	-	Oryza sativa	gibberellin-responsive
DlMYB58	GARE-motif	TCTGTTG	1985	7	+	Brassica oleracea	gibberellin-responsive
DlMYB60	GARE-motif	TCTGTTG	1462	7	-	Brassica oleracea	gibberellin-responsive
DlMYB61	P-box	CCTTTTG	1568	7	+	Oryza sativa	gibberellin-responsive
DlMYB62	GARE-motif	TCTGTTG	1091	7	-	Brassica oleracea	gibberellin-responsive
DlMYB63	GARE-motif	TCTGTTG	422	7	-	Brassica oleracea	gibberellin-responsive
DlMYB63	P-box	CCTTTTG	899	7	-	Oryza sativa	gibberellin-responsive
DlMYB64	GARE-motif	TCTGTTG	1093	7	-	Brassica oleracea	gibberellin-responsive
DlMYB65	P-box	CCTTTTG	899	7	-	Oryza sativa	gibberellin-responsive
DlMYB65	GARE-motif	TCTGTTG	422	7	-	Brassica oleracea	gibberellin-responsive
DlMYB66	GARE-motif	TCTGTTG	1063	7	-	Brassica oleracea	gibberellin-responsive
DlMYB68	P-box	CCTTTTG	272	7	+	Oryza sativa	gibberellin-responsive
DlMYB68	P-box	CCTTTTG	809	7	+	Oryza sativa	gibberellin-responsive
DlMYB68	GARE-motif	TCTGTTG	1975	7	+	Brassica oleracea	gibberellin-responsive
DlMYB69	GARE-motif	TCTGTTG	1894	7	+	Brassica oleracea	gibberellin-responsive
DlMYB7	GARE-motif	TCTGTTG	945	7	-	Brassica oleracea	gibberellin-responsive
DlMYB7	GARE-motif	TCTGTTG	1109	7	+	Brassica oleracea	gibberellin-responsive
DlMYB74	P-box	CCTTTTG	1067	7	-	Oryza sativa	gibberellin-responsive
DlMYB76	GARE-motif	TCTGTTG	1435	7	-	Brassica oleracea	gibberellin-responsive
DlMYB76	P-box	CCTTTTG	33	7	-	Oryza sativa	gibberellin-responsive
DlMYB79	GARE-motif	TCTGTTG	1325	7	+	Brassica oleracea	gibberellin-responsive
DlMYB8	P-box	CCTTTTG	639	7	+	Oryza sativa	gibberellin-responsive
DlMYB8	P-box	CCTTTTG	1462	7	-	Oryza sativa	gibberellin-responsive
DlMYB80	P-box	CCTTTTG	70	7	-	Oryza sativa	gibberellin-responsive
DlMYB80	P-box	CCTTTTG	1746	7	+	Oryza sativa	gibberellin-responsive
DlMYB80	P-box	CCTTTTG	1790	7	-	Oryza sativa	gibberellin-responsive
DlMYB81	GARE-motif	TCTGTTG	1522	7	+	Brassica oleracea	gibberellin-responsive
DlMYB84	P-box	CCTTTTG	1	7	-	Oryza sativa	gibberellin-responsive
DlMYB88	P-box	CCTTTTG	1582	7	-	Oryza sativa	gibberellin-responsive
DlMYB90	P-box	CCTTTTG	1194	7	+	Oryza sativa	gibberellin-responsive
DlMYB91	P-box	CCTTTTG	1857	7	+	Oryza sativa	gibberellin-responsive
DlMYB97	GARE-motif	TCTGTTG	1023	7	-	Brassica oleracea	gibberellin-responsive
DlMYB97	P-box	CCTTTTG	1415	7	+	Oryza sativa	gibberellin-responsive
DlMYB98	P-box	CCTTTTG	1003	7	+	Oryza sativa	gibberellin-responsive
DlMYB10	LTR	CCGAAA	1409	6	+	Hordeum vulgare	low-temperature responsive
DlMYB11	LTR	CCGAAA	740	6	+	Hordeum vulgare	low-temperature responsive
DlMYB11	LTR	CCGAAA	1400	6	-	Hordeum vulgare	low-temperature responsive
DlMYB12	LTR	CCGAAA	693	6	+	Hordeum vulgare	low-temperature responsive
DlMYB13	LTR	CCGAAA	1900	6	+	Hordeum vulgare	low-temperature responsive
DlMYB16	LTR	CCGAAA	1617	6	+	Hordeum vulgare	low-temperature responsive
DlMYB18	LTR	CCGAAA	1104	6	-	Hordeum vulgare	low-temperature responsive
DlMYB23	LTR	CCGAAA	79	6	-	Hordeum vulgare	low-temperature responsive
DlMYB26	LTR	CCGAAA	1748	6	-	Hordeum vulgare	low-temperature responsive
DlMYB27	LTR	CCGAAA	846	6	+	Hordeum vulgare	low-temperature responsive
DlMYB3	LTR	CCGAAA	453	6	+	Hordeum vulgare	low-temperature responsive
DlMYB30	LTR	CCGAAA	553	6	+	Hordeum vulgare	low-temperature responsive
DlMYB31	LTR	CCGAAA	1080	6	-	Hordeum vulgare	low-temperature responsive
DlMYB35	LTR	CCGAAA	1225	6	+	Hordeum vulgare	low-temperature responsive
DlMYB35	LTR	CCGAAA	1706	6	-	Hordeum vulgare	low-temperature responsive
DlMYB36	LTR	CCGAAA	1141	6	-	Hordeum vulgare	low-temperature responsive
DlMYB36	LTR	CCGAAA	1617	6	+	Hordeum vulgare	low-temperature responsive
DlMYB36	LTR	CCGAAA	1652	6	-	Hordeum vulgare	low-temperature responsive
DlMYB40	LTR	CCGAAA	38	6	-	Hordeum vulgare	low-temperature responsive
DlMYB42	LTR	CCGAAA	659	6	-	Hordeum vulgare	low-temperature responsive
DlMYB42	LTR	CCGAAA	1673	6	+	Hordeum vulgare	low-temperature responsive
DlMYB50	LTR	CCGAAA	359	6	-	Hordeum vulgare	low-temperature responsive
DlMYB8	LTR	CCGAAA	1284	6	+	Hordeum vulgare	low-temperature responsive
DlMYB9	LTR	CCGAAA	886	6	+	Hordeum vulgare	low-temperature responsive
DlMYB101	LTR	CCGAAA	1725	6	-	Hordeum vulgare	low-temperature responsive
DlMYB102	LTR	CCGAAA	1365	6	-	Hordeum vulgare	low-temperature responsive
DlMYB103	LTR	CCGAAA	520	6	+	Hordeum vulgare	low-temperature responsive
DlMYB56	LTR	CCGAAA	991	6	-	Hordeum vulgare	low-temperature responsive
DlMYB58	LTR	CCGAAA	740	6	+	Hordeum vulgare	low-temperature responsive
DlMYB59	LTR	CCGAAA	996	6	-	Hordeum vulgare	low-temperature responsive
DlMYB60	LTR	CCGAAA	385	6	+	Hordeum vulgare	low-temperature responsive
DlMYB60	LTR	CCGAAA	464	6	-	Hordeum vulgare	low-temperature responsive
DlMYB62	LTR	CCGAAA	1222	6	+	Hordeum vulgare	low-temperature responsive
DlMYB63	LTR	CCGAAA	802	6	+	Hordeum vulgare	low-temperature responsive
DlMYB64	LTR	CCGAAA	1224	6	+	Hordeum vulgare	low-temperature responsive
DlMYB65	LTR	CCGAAA	802	6	+	Hordeum vulgare	low-temperature responsive
DlMYB68	LTR	CCGAAA	1435	6	+	Hordeum vulgare	low-temperature responsive
DlMYB69	LTR	CCGAAA	29	6	-	Hordeum vulgare	low-temperature responsive
DlMYB75	LTR	CCGAAA	1988	6	-	Hordeum vulgare	low-temperature responsive
DlMYB77	LTR	CCGAAA	637	6	-	Hordeum vulgare	low-temperature responsive
DlMYB83	LTR	CCGAAA	391	6	-	Hordeum vulgare	low-temperature responsive
DlMYB88	LTR	CCGAAA	1781	6	+	Hordeum vulgare	low-temperature responsive
DlMYB91	LTR	CCGAAA	926	6	-	Hordeum vulgare	low-temperature responsive
DlMYB107	LTR	CCGAAA	609	6	-	Hordeum vulgare	low-temperature responsive
DlMYB110	LTR	CCGAAA	13	6	-	Hordeum vulgare	low-temperature responsive
DlMYB110	LTR	CCGAAA	56	6	+	Hordeum vulgare	low-temperature responsive
DlMYB110	LTR	CCGAAA	220	6	+	Hordeum vulgare	low-temperature responsive
DlMYB113	LTR	CCGAAA	857	6	-	Hordeum vulgare	low-temperature responsive
DlMYB115	LTR	CCGAAA	719	6	-	Hordeum vulgare	low-temperature responsive
DlMYB116	LTR	CCGAAA	188	6	+	Hordeum vulgare	low-temperature responsive
DlMYB117	LTR	CCGAAA	557	6	+	Hordeum vulgare	low-temperature responsive
DlMYB97	LTR	CCGAAA	1878	6	+	Hordeum vulgare	low-temperature responsive
DlMYB100	ARE	AAACCA	342	6	-	Zea mays	anaerobic induction
DlMYB100	ARE	AAACCA	373	6	+	Zea mays	anaerobic induction
DlMYB100	ARE	AAACCA	1336	6	-	Zea mays	anaerobic induction
DlMYB101	ARE	AAACCA	29	6	+	Zea mays	anaerobic induction
DlMYB101	ARE	AAACCA	473	6	+	Zea mays	anaerobic induction
DlMYB101	ARE	AAACCA	794	6	-	Zea mays	anaerobic induction
DlMYB102	ARE	AAACCA	247	6	+	Zea mays	anaerobic induction
DlMYB102	ARE	AAACCA	362	6	-	Zea mays	anaerobic induction
DlMYB102	ARE	AAACCA	1312	6	+	Zea mays	anaerobic induction
DlMYB103	ARE	AAACCA	494	6	-	Zea mays	anaerobic induction
DlMYB103	ARE	AAACCA	528	6	+	Zea mays	anaerobic induction
DlMYB103	ARE	AAACCA	566	6	+	Zea mays	anaerobic induction
DlMYB103	ARE	AAACCA	662	6	-	Zea mays	anaerobic induction
DlMYB103	ARE	AAACCA	822	6	-	Zea mays	anaerobic induction
DlMYB104	ARE	AAACCA	67	6	+	Zea mays	anaerobic induction
DlMYB104	ARE	AAACCA	411	6	+	Zea mays	anaerobic induction
DlMYB104	ARE	AAACCA	657	6	+	Zea mays	anaerobic induction
DlMYB104	ARE	AAACCA	1430	6	+	Zea mays	anaerobic induction
DlMYB104	ARE	AAACCA	1687	6	-	Zea mays	anaerobic induction
DlMYB105	ARE	AAACCA	335	6	-	Zea mays	anaerobic induction
DlMYB105	ARE	AAACCA	1156	6	+	Zea mays	anaerobic induction
DlMYB105	ARE	AAACCA	1264	6	-	Zea mays	anaerobic induction
DlMYB106	ARE	AAACCA	16	6	+	Zea mays	anaerobic induction
DlMYB106	ARE	AAACCA	388	6	+	Zea mays	anaerobic induction
DlMYB106	ARE	AAACCA	790	6	-	Zea mays	anaerobic induction
DlMYB106	ARE	AAACCA	1279	6	-	Zea mays	anaerobic induction
DlMYB108	ARE	AAACCA	1527	6	-	Zea mays	anaerobic induction
DlMYB108	ARE	AAACCA	1634	6	+	Zea mays	anaerobic induction
DlMYB109	ARE	AAACCA	898	6	-	Zea mays	anaerobic induction
DlMYB109	ARE	AAACCA	1035	6	-	Zea mays	anaerobic induction
DlMYB109	ARE	AAACCA	1208	6	+	Zea mays	anaerobic induction
DlMYB11	ARE	AAACCA	1937	6	+	Zea mays	anaerobic induction
DlMYB110	ARE	AAACCA	970	6	+	Zea mays	anaerobic induction
DlMYB110	ARE	AAACCA	1336	6	+	Zea mays	anaerobic induction
DlMYB110	ARE	AAACCA	1844	6	+	Zea mays	anaerobic induction
DlMYB111	ARE	AAACCA	442	6	+	Zea mays	anaerobic induction
DlMYB112	ARE	AAACCA	1642	6	+	Zea mays	anaerobic induction
DlMYB113	ARE	AAACCA	502	6	+	Zea mays	anaerobic induction
DlMYB113	ARE	AAACCA	1252	6	+	Zea mays	anaerobic induction
DlMYB113	ARE	AAACCA	1317	6	+	Zea mays	anaerobic induction
DlMYB114	ARE	AAACCA	128	6	-	Zea mays	anaerobic induction
DlMYB114	ARE	AAACCA	567	6	-	Zea mays	anaerobic induction
DlMYB114	ARE	AAACCA	699	6	-	Zea mays	anaerobic induction
DlMYB114	ARE	AAACCA	1299	6	+	Zea mays	anaerobic induction
DlMYB114	ARE	AAACCA	1378	6	-	Zea mays	anaerobic induction
DlMYB114	ARE	AAACCA	1773	6	+	Zea mays	anaerobic induction
DlMYB115	ARE	AAACCA	732	6	-	Zea mays	anaerobic induction
DlMYB115	ARE	AAACCA	1163	6	+	Zea mays	anaerobic induction
DlMYB116	ARE	AAACCA	1392	6	-	Zea mays	anaerobic induction
DlMYB118	ARE	AAACCA	28	6	+	Zea mays	anaerobic induction
DlMYB119	ARE	AAACCA	216	6	-	Zea mays	anaerobic induction
DlMYB119	ARE	AAACCA	1439	6	-	Zea mays	anaerobic induction
DlMYB119	ARE	AAACCA	1958	6	+	Zea mays	anaerobic induction
DlMYB12	ARE	AAACCA	1263	6	-	Zea mays	anaerobic induction
DlMYB12	ARE	AAACCA	1562	6	+	Zea mays	anaerobic induction
DlMYB13	ARE	AAACCA	726	6	+	Zea mays	anaerobic induction
DlMYB13	ARE	AAACCA	1943	6	-	Zea mays	anaerobic induction
DlMYB14	ARE	AAACCA	1154	6	+	Zea mays	anaerobic induction
DlMYB15	ARE	AAACCA	1154	6	+	Zea mays	anaerobic induction
DlMYB16	ARE	AAACCA	313	6	+	Zea mays	anaerobic induction
DlMYB16	ARE	AAACCA	1426	6	+	Zea mays	anaerobic induction
DlMYB16	ARE	AAACCA	1484	6	-	Zea mays	anaerobic induction
DlMYB16	ARE	AAACCA	1906	6	+	Zea mays	anaerobic induction
DlMYB16	ARE	AAACCA	1993	6	+	Zea mays	anaerobic induction
DlMYB17	ARE	AAACCA	1146	6	+	Zea mays	anaerobic induction
DlMYB18	ARE	AAACCA	228	6	-	Zea mays	anaerobic induction
DlMYB18	ARE	AAACCA	849	6	-	Zea mays	anaerobic induction
DlMYB18	ARE	AAACCA	1100	6	-	Zea mays	anaerobic induction
DlMYB19	ARE	AAACCA	1047	6	+	Zea mays	anaerobic induction
DlMYB20	ARE	AAACCA	25	6	+	Zea mays	anaerobic induction
DlMYB20	ARE	AAACCA	1075	6	+	Zea mays	anaerobic induction
DlMYB21	ARE	AAACCA	1630	6	-	Zea mays	anaerobic induction
DlMYB22	ARE	AAACCA	920	6	+	Zea mays	anaerobic induction
DlMYB22	ARE	AAACCA	1169	6	+	Zea mays	anaerobic induction
DlMYB22	ARE	AAACCA	1353	6	+	Zea mays	anaerobic induction
DlMYB22	ARE	AAACCA	1511	6	-	Zea mays	anaerobic induction
DlMYB22	ARE	AAACCA	1608	6	-	Zea mays	anaerobic induction
DlMYB23	ARE	AAACCA	533	6	-	Zea mays	anaerobic induction
DlMYB23	ARE	AAACCA	559	6	-	Zea mays	anaerobic induction
DlMYB23	ARE	AAACCA	1041	6	+	Zea mays	anaerobic induction
DlMYB26	ARE	AAACCA	45	6	+	Zea mays	anaerobic induction
DlMYB26	ARE	AAACCA	168	6	-	Zea mays	anaerobic induction
DlMYB26	ARE	AAACCA	517	6	+	Zea mays	anaerobic induction
DlMYB26	ARE	AAACCA	1870	6	-	Zea mays	anaerobic induction
DlMYB27	ARE	AAACCA	628	6	-	Zea mays	anaerobic induction
DlMYB27	ARE	AAACCA	1782	6	-	Zea mays	anaerobic induction
DlMYB28	ARE	AAACCA	266	6	-	Zea mays	anaerobic induction
DlMYB28	ARE	AAACCA	1995	6	+	Zea mays	anaerobic induction
DlMYB29	ARE	AAACCA	436	6	-	Zea mays	anaerobic induction
DlMYB29	ARE	AAACCA	1995	6	+	Zea mays	anaerobic induction
DlMYB3	ARE	AAACCA	84	6	-	Zea mays	anaerobic induction
DlMYB3	ARE	AAACCA	1122	6	-	Zea mays	anaerobic induction
DlMYB3	ARE	AAACCA	1448	6	+	Zea mays	anaerobic induction
DlMYB30	ARE	AAACCA	1220	6	-	Zea mays	anaerobic induction
DlMYB30	ARE	AAACCA	1254	6	-	Zea mays	anaerobic induction
DlMYB32	ARE	AAACCA	510	6	+	Zea mays	anaerobic induction
DlMYB32	ARE	AAACCA	632	6	+	Zea mays	anaerobic induction
DlMYB32	ARE	AAACCA	682	6	-	Zea mays	anaerobic induction
DlMYB32	ARE	AAACCA	704	6	-	Zea mays	anaerobic induction
DlMYB32	ARE	AAACCA	767	6	-	Zea mays	anaerobic induction
DlMYB32	ARE	AAACCA	839	6	-	Zea mays	anaerobic induction
DlMYB33	ARE	AAACCA	874	6	-	Zea mays	anaerobic induction
DlMYB33	ARE	AAACCA	1391	6	+	Zea mays	anaerobic induction
DlMYB33	ARE	AAACCA	1903	6	+	Zea mays	anaerobic induction
DlMYB34	ARE	AAACCA	79	6	+	Zea mays	anaerobic induction
DlMYB34	ARE	AAACCA	603	6	+	Zea mays	anaerobic induction
DlMYB35	ARE	AAACCA	1509	6	-	Zea mays	anaerobic induction
DlMYB35	ARE	AAACCA	1719	6	+	Zea mays	anaerobic induction
DlMYB36	ARE	AAACCA	1310	6	+	Zea mays	anaerobic induction
DlMYB36	ARE	AAACCA	1635	6	+	Zea mays	anaerobic induction
DlMYB36	ARE	AAACCA	1787	6	+	Zea mays	anaerobic induction
DlMYB37	ARE	AAACCA	1091	6	+	Zea mays	anaerobic induction
DlMYB38	ARE	AAACCA	577	6	-	Zea mays	anaerobic induction
DlMYB38	ARE	AAACCA	905	6	-	Zea mays	anaerobic induction
DlMYB39	ARE	AAACCA	586	6	-	Zea mays	anaerobic induction
DlMYB39	ARE	AAACCA	1738	6	-	Zea mays	anaerobic induction
DlMYB4	ARE	AAACCA	587	6	+	Zea mays	anaerobic induction
DlMYB4	ARE	AAACCA	818	6	+	Zea mays	anaerobic induction
DlMYB4	ARE	AAACCA	902	6	-	Zea mays	anaerobic induction
DlMYB4	ARE	AAACCA	1016	6	+	Zea mays	anaerobic induction
DlMYB4	ARE	AAACCA	1257	6	-	Zea mays	anaerobic induction
DlMYB40	ARE	AAACCA	1001	6	-	Zea mays	anaerobic induction
DlMYB40	ARE	AAACCA	1816	6	+	Zea mays	anaerobic induction
DlMYB40	ARE	AAACCA	1951	6	-	Zea mays	anaerobic induction
DlMYB41	ARE	AAACCA	420	6	-	Zea mays	anaerobic induction
DlMYB42	ARE	AAACCA	915	6	+	Zea mays	anaerobic induction
DlMYB42	ARE	AAACCA	1852	6	-	Zea mays	anaerobic induction
DlMYB43	ARE	AAACCA	503	6	-	Zea mays	anaerobic induction
DlMYB43	ARE	AAACCA	1014	6	-	Zea mays	anaerobic induction
DlMYB44	ARE	AAACCA	309	6	+	Zea mays	anaerobic induction
DlMYB44	ARE	AAACCA	1416	6	-	Zea mays	anaerobic induction
DlMYB44	ARE	AAACCA	1958	6	+	Zea mays	anaerobic induction
DlMYB45	ARE	AAACCA	1029	6	-	Zea mays	anaerobic induction
DlMYB45	ARE	AAACCA	1834	6	+	Zea mays	anaerobic induction
DlMYB46	ARE	AAACCA	1033	6	-	Zea mays	anaerobic induction
DlMYB47	ARE	AAACCA	1560	6	+	Zea mays	anaerobic induction
DlMYB47	ARE	AAACCA	1724	6	+	Zea mays	anaerobic induction
DlMYB48	ARE	AAACCA	484	6	+	Zea mays	anaerobic induction
DlMYB50	ARE	AAACCA	496	6	-	Zea mays	anaerobic induction
DlMYB50	ARE	AAACCA	577	6	-	Zea mays	anaerobic induction
DlMYB50	ARE	AAACCA	784	6	-	Zea mays	anaerobic induction
DlMYB51	ARE	AAACCA	941	6	-	Zea mays	anaerobic induction
DlMYB51	ARE	AAACCA	1368	6	+	Zea mays	anaerobic induction
DlMYB55	ARE	AAACCA	452	6	+	Zea mays	anaerobic induction
DlMYB55	ARE	AAACCA	828	6	+	Zea mays	anaerobic induction
DlMYB55	ARE	AAACCA	1562	6	+	Zea mays	anaerobic induction
DlMYB56	ARE	AAACCA	925	6	-	Zea mays	anaerobic induction
DlMYB56	ARE	AAACCA	1777	6	-	Zea mays	anaerobic induction
DlMYB57	ARE	AAACCA	296	6	+	Zea mays	anaerobic induction
DlMYB57	ARE	AAACCA	403	6	+	Zea mays	anaerobic induction
DlMYB57	ARE	AAACCA	1488	6	+	Zea mays	anaerobic induction
DlMYB57	ARE	AAACCA	1895	6	-	Zea mays	anaerobic induction
DlMYB57	ARE	AAACCA	1902	6	+	Zea mays	anaerobic induction
DlMYB58	ARE	AAACCA	1661	6	-	Zea mays	anaerobic induction
DlMYB58	ARE	AAACCA	1697	6	+	Zea mays	anaerobic induction
DlMYB58	ARE	AAACCA	1908	6	+	Zea mays	anaerobic induction
DlMYB59	ARE	AAACCA	65	6	+	Zea mays	anaerobic induction
DlMYB59	ARE	AAACCA	1450	6	-	Zea mays	anaerobic induction
DlMYB6	ARE	AAACCA	815	6	-	Zea mays	anaerobic induction
DlMYB6	ARE	AAACCA	1326	6	+	Zea mays	anaerobic induction
DlMYB6	ARE	AAACCA	1366	6	-	Zea mays	anaerobic induction
DlMYB61	ARE	AAACCA	399	6	-	Zea mays	anaerobic induction
DlMYB61	ARE	AAACCA	437	6	-	Zea mays	anaerobic induction
DlMYB61	ARE	AAACCA	855	6	-	Zea mays	anaerobic induction
DlMYB62	ARE	AAACCA	487	6	-	Zea mays	anaerobic induction
DlMYB62	ARE	AAACCA	568	6	+	Zea mays	anaerobic induction
DlMYB62	ARE	AAACCA	1302	6	-	Zea mays	anaerobic induction
DlMYB62	ARE	AAACCA	1724	6	+	Zea mays	anaerobic induction
DlMYB63	ARE	AAACCA	915	6	+	Zea mays	anaerobic induction
DlMYB63	ARE	AAACCA	926	6	+	Zea mays	anaerobic induction
DlMYB63	ARE	AAACCA	1743	6	+	Zea mays	anaerobic induction
DlMYB64	ARE	AAACCA	243	6	+	Zea mays	anaerobic induction
DlMYB64	ARE	AAACCA	432	6	-	Zea mays	anaerobic induction
DlMYB64	ARE	AAACCA	1304	6	-	Zea mays	anaerobic induction
DlMYB64	ARE	AAACCA	1724	6	+	Zea mays	anaerobic induction
DlMYB65	ARE	AAACCA	915	6	+	Zea mays	anaerobic induction
DlMYB65	ARE	AAACCA	926	6	+	Zea mays	anaerobic induction
DlMYB65	ARE	AAACCA	1743	6	+	Zea mays	anaerobic induction
DlMYB66	ARE	AAACCA	192	6	-	Zea mays	anaerobic induction
DlMYB66	ARE	AAACCA	1124	6	-	Zea mays	anaerobic induction
DlMYB66	ARE	AAACCA	1510	6	-	Zea mays	anaerobic induction
DlMYB67	ARE	AAACCA	531	6	-	Zea mays	anaerobic induction
DlMYB67	ARE	AAACCA	1960	6	-	Zea mays	anaerobic induction
DlMYB68	ARE	AAACCA	1926	6	-	Zea mays	anaerobic induction
DlMYB69	ARE	AAACCA	292	6	+	Zea mays	anaerobic induction
DlMYB69	ARE	AAACCA	1839	6	+	Zea mays	anaerobic induction
DlMYB69	ARE	AAACCA	1873	6	+	Zea mays	anaerobic induction
DlMYB7	ARE	AAACCA	1641	6	+	Zea mays	anaerobic induction
DlMYB70	ARE	AAACCA	1060	6	+	Zea mays	anaerobic induction
DlMYB70	ARE	AAACCA	1617	6	+	Zea mays	anaerobic induction
DlMYB70	ARE	AAACCA	1953	6	-	Zea mays	anaerobic induction
DlMYB71	ARE	AAACCA	1140	6	+	Zea mays	anaerobic induction
DlMYB72	ARE	AAACCA	84	6	-	Zea mays	anaerobic induction
DlMYB72	ARE	AAACCA	1143	6	-	Zea mays	anaerobic induction
DlMYB72	ARE	AAACCA	1875	6	-	Zea mays	anaerobic induction
DlMYB73	ARE	AAACCA	1122	6	+	Zea mays	anaerobic induction
DlMYB73	ARE	AAACCA	1635	6	-	Zea mays	anaerobic induction
DlMYB75	ARE	AAACCA	1322	6	-	Zea mays	anaerobic induction
DlMYB75	ARE	AAACCA	1460	6	+	Zea mays	anaerobic induction
DlMYB75	ARE	AAACCA	1672	6	+	Zea mays	anaerobic induction
DlMYB76	ARE	AAACCA	195	6	+	Zea mays	anaerobic induction
DlMYB77	ARE	AAACCA	431	6	+	Zea mays	anaerobic induction
DlMYB77	ARE	AAACCA	768	6	-	Zea mays	anaerobic induction
DlMYB77	ARE	AAACCA	1270	6	-	Zea mays	anaerobic induction
DlMYB77	ARE	AAACCA	1549	6	-	Zea mays	anaerobic induction
DlMYB77	ARE	AAACCA	1934	6	+	Zea mays	anaerobic induction
DlMYB78	ARE	AAACCA	104	6	-	Zea mays	anaerobic induction
DlMYB78	ARE	AAACCA	427	6	-	Zea mays	anaerobic induction
DlMYB78	ARE	AAACCA	1960	6	-	Zea mays	anaerobic induction
DlMYB79	ARE	AAACCA	1373	6	+	Zea mays	anaerobic induction
DlMYB79	ARE	AAACCA	1988	6	-	Zea mays	anaerobic induction
DlMYB8	ARE	AAACCA	1078	6	+	Zea mays	anaerobic induction
DlMYB8	ARE	AAACCA	1100	6	+	Zea mays	anaerobic induction
DlMYB8	ARE	AAACCA	1437	6	+	Zea mays	anaerobic induction
DlMYB80	ARE	AAACCA	15	6	-	Zea mays	anaerobic induction
DlMYB80	ARE	AAACCA	1878	6	+	Zea mays	anaerobic induction
DlMYB80	ARE	AAACCA	1958	6	+	Zea mays	anaerobic induction
DlMYB83	ARE	AAACCA	597	6	+	Zea mays	anaerobic induction
DlMYB84	ARE	AAACCA	685	6	-	Zea mays	anaerobic induction
DlMYB84	ARE	AAACCA	808	6	+	Zea mays	anaerobic induction
DlMYB84	ARE	AAACCA	1276	6	+	Zea mays	anaerobic induction
DlMYB85	ARE	AAACCA	340	6	+	Zea mays	anaerobic induction
DlMYB86	ARE	AAACCA	188	6	-	Zea mays	anaerobic induction
DlMYB86	ARE	AAACCA	1802	6	+	Zea mays	anaerobic induction
DlMYB86	ARE	AAACCA	1831	6	+	Zea mays	anaerobic induction
DlMYB87	ARE	AAACCA	891	6	+	Zea mays	anaerobic induction
DlMYB87	ARE	AAACCA	1688	6	-	Zea mays	anaerobic induction
DlMYB88	ARE	AAACCA	515	6	-	Zea mays	anaerobic induction
DlMYB88	ARE	AAACCA	1575	6	+	Zea mays	anaerobic induction
DlMYB89	ARE	AAACCA	806	6	+	Zea mays	anaerobic induction
DlMYB9	ARE	AAACCA	225	6	-	Zea mays	anaerobic induction
DlMYB9	ARE	AAACCA	513	6	-	Zea mays	anaerobic induction
DlMYB9	ARE	AAACCA	890	6	+	Zea mays	anaerobic induction
DlMYB9	ARE	AAACCA	965	6	-	Zea mays	anaerobic induction
DlMYB90	ARE	AAACCA	421	6	-	Zea mays	anaerobic induction
DlMYB91	ARE	AAACCA	192	6	+	Zea mays	anaerobic induction
DlMYB91	ARE	AAACCA	399	6	+	Zea mays	anaerobic induction
DlMYB91	ARE	AAACCA	567	6	+	Zea mays	anaerobic induction
DlMYB91	ARE	AAACCA	973	6	-	Zea mays	anaerobic induction
DlMYB92	ARE	AAACCA	394	6	-	Zea mays	anaerobic induction
DlMYB92	ARE	AAACCA	1548	6	-	Zea mays	anaerobic induction
DlMYB93	ARE	AAACCA	74	6	+	Zea mays	anaerobic induction
DlMYB93	ARE	AAACCA	98	6	+	Zea mays	anaerobic induction
DlMYB93	ARE	AAACCA	397	6	+	Zea mays	anaerobic induction
DlMYB94	ARE	AAACCA	332	6	+	Zea mays	anaerobic induction
DlMYB94	ARE	AAACCA	612	6	-	Zea mays	anaerobic induction
DlMYB94	ARE	AAACCA	868	6	+	Zea mays	anaerobic induction
DlMYB95	ARE	AAACCA	24	6	+	Zea mays	anaerobic induction
DlMYB95	ARE	AAACCA	290	6	-	Zea mays	anaerobic induction
DlMYB95	ARE	AAACCA	477	6	+	Zea mays	anaerobic induction
DlMYB95	ARE	AAACCA	923	6	-	Zea mays	anaerobic induction
DlMYB95	ARE	AAACCA	1522	6	+	Zea mays	anaerobic induction
DlMYB96	ARE	AAACCA	414	6	-	Zea mays	anaerobic induction
DlMYB96	ARE	AAACCA	1261	6	+	Zea mays	anaerobic induction
DlMYB97	ARE	AAACCA	1740	6	+	Zea mays	anaerobic induction
DlMYB98	ARE	AAACCA	18	6	-	Zea mays	anaerobic induction
DlMYB98	ARE	AAACCA	133	6	+	Zea mays	anaerobic induction
DlMYB98	ARE	AAACCA	220	6	-	Zea mays	anaerobic induction
DlMYB98	ARE	AAACCA	393	6	-	Zea mays	anaerobic induction
DlMYB98	ARE	AAACCA	486	6	-	Zea mays	anaerobic induction
DlMYB99	ARE	AAACCA	1945	6	+	Zea mays	anaerobic induction
DlMYB10	TGACG-motif	TGACG	945	5	+	Hordeum vulgare	MeJA-responsive
DlMYB10	TGACG-motif	TGACG	1768	5	-	Hordeum vulgare	MeJA-responsive
DlMYB10	CGTCA-motif	CGTCA	945	5	-	Hordeum vulgare	MeJA-responsive
DlMYB10	CGTCA-motif	CGTCA	1768	5	+	Hordeum vulgare	MeJA-responsive
DlMYB101	TGACG-motif	TGACG	214	5	+	Hordeum vulgare	MeJA-responsive
DlMYB101	TGACG-motif	TGACG	526	5	-	Hordeum vulgare	MeJA-responsive
DlMYB101	TGACG-motif	TGACG	858	5	+	Hordeum vulgare	MeJA-responsive
DlMYB101	TGACG-motif	TGACG	1679	5	-	Hordeum vulgare	MeJA-responsive
DlMYB101	TGACG-motif	TGACG	1844	5	-	Hordeum vulgare	MeJA-responsive
DlMYB101	CGTCA-motif	CGTCA	214	5	-	Hordeum vulgare	MeJA-responsive
DlMYB101	CGTCA-motif	CGTCA	526	5	+	Hordeum vulgare	MeJA-responsive
DlMYB101	CGTCA-motif	CGTCA	858	5	-	Hordeum vulgare	MeJA-responsive
DlMYB101	CGTCA-motif	CGTCA	1679	5	+	Hordeum vulgare	MeJA-responsive
DlMYB101	CGTCA-motif	CGTCA	1844	5	+	Hordeum vulgare	MeJA-responsive
DlMYB102	TGACG-motif	TGACG	1032	5	-	Hordeum vulgare	MeJA-responsive
DlMYB102	CGTCA-motif	CGTCA	1032	5	+	Hordeum vulgare	MeJA-responsive
DlMYB103	TGACG-motif	TGACG	965	5	-	Hordeum vulgare	MeJA-responsive
DlMYB103	CGTCA-motif	CGTCA	965	5	+	Hordeum vulgare	MeJA-responsive
DlMYB104	CGTCA-motif	CGTCA	438	5	-	Hordeum vulgare	MeJA-responsive
DlMYB104	CGTCA-motif	CGTCA	441	5	+	Hordeum vulgare	MeJA-responsive
DlMYB104	TGACG-motif	TGACG	438	5	+	Hordeum vulgare	MeJA-responsive
DlMYB104	TGACG-motif	TGACG	441	5	-	Hordeum vulgare	MeJA-responsive
DlMYB106	CGTCA-motif	CGTCA	263	5	+	Hordeum vulgare	MeJA-responsive
DlMYB106	CGTCA-motif	CGTCA	370	5	+	Hordeum vulgare	MeJA-responsive
DlMYB106	TGACG-motif	TGACG	263	5	-	Hordeum vulgare	MeJA-responsive
DlMYB106	TGACG-motif	TGACG	370	5	-	Hordeum vulgare	MeJA-responsive
DlMYB108	TGACG-motif	TGACG	540	5	-	Hordeum vulgare	MeJA-responsive
DlMYB108	TGACG-motif	TGACG	1565	5	+	Hordeum vulgare	MeJA-responsive
DlMYB108	TGACG-motif	TGACG	1572	5	+	Hordeum vulgare	MeJA-responsive
DlMYB108	CGTCA-motif	CGTCA	540	5	+	Hordeum vulgare	MeJA-responsive
DlMYB108	CGTCA-motif	CGTCA	1565	5	-	Hordeum vulgare	MeJA-responsive
DlMYB108	CGTCA-motif	CGTCA	1572	5	-	Hordeum vulgare	MeJA-responsive
DlMYB109	CGTCA-motif	CGTCA	132	5	-	Hordeum vulgare	MeJA-responsive
DlMYB109	CGTCA-motif	CGTCA	721	5	+	Hordeum vulgare	MeJA-responsive
DlMYB109	CGTCA-motif	CGTCA	867	5	+	Hordeum vulgare	MeJA-responsive
DlMYB109	TGACG-motif	TGACG	132	5	+	Hordeum vulgare	MeJA-responsive
DlMYB109	TGACG-motif	TGACG	721	5	-	Hordeum vulgare	MeJA-responsive
DlMYB109	TGACG-motif	TGACG	867	5	-	Hordeum vulgare	MeJA-responsive
DlMYB11	CGTCA-motif	CGTCA	1782	5	+	Hordeum vulgare	MeJA-responsive
DlMYB11	TGACG-motif	TGACG	1782	5	-	Hordeum vulgare	MeJA-responsive
DlMYB113	TGACG-motif	TGACG	455	5	-	Hordeum vulgare	MeJA-responsive
DlMYB113	TGACG-motif	TGACG	566	5	-	Hordeum vulgare	MeJA-responsive
DlMYB113	TGACG-motif	TGACG	1139	5	+	Hordeum vulgare	MeJA-responsive
DlMYB113	TGACG-motif	TGACG	1293	5	+	Hordeum vulgare	MeJA-responsive
DlMYB113	CGTCA-motif	CGTCA	455	5	+	Hordeum vulgare	MeJA-responsive
DlMYB113	CGTCA-motif	CGTCA	566	5	+	Hordeum vulgare	MeJA-responsive
DlMYB113	CGTCA-motif	CGTCA	1139	5	-	Hordeum vulgare	MeJA-responsive
DlMYB113	CGTCA-motif	CGTCA	1293	5	-	Hordeum vulgare	MeJA-responsive
DlMYB114	CGTCA-motif	CGTCA	146	5	-	Hordeum vulgare	MeJA-responsive
DlMYB114	CGTCA-motif	CGTCA	1104	5	+	Hordeum vulgare	MeJA-responsive
DlMYB114	CGTCA-motif	CGTCA	1581	5	-	Hordeum vulgare	MeJA-responsive
DlMYB114	TGACG-motif	TGACG	146	5	+	Hordeum vulgare	MeJA-responsive
DlMYB114	TGACG-motif	TGACG	1104	5	-	Hordeum vulgare	MeJA-responsive
DlMYB114	TGACG-motif	TGACG	1581	5	+	Hordeum vulgare	MeJA-responsive
DlMYB115	CGTCA-motif	CGTCA	945	5	-	Hordeum vulgare	MeJA-responsive
DlMYB115	CGTCA-motif	CGTCA	1171	5	-	Hordeum vulgare	MeJA-responsive
DlMYB115	CGTCA-motif	CGTCA	1736	5	+	Hordeum vulgare	MeJA-responsive
DlMYB115	TGACG-motif	TGACG	945	5	+	Hordeum vulgare	MeJA-responsive
DlMYB115	TGACG-motif	TGACG	1171	5	+	Hordeum vulgare	MeJA-responsive
DlMYB115	TGACG-motif	TGACG	1736	5	-	Hordeum vulgare	MeJA-responsive
DlMYB116	CGTCA-motif	CGTCA	1174	5	-	Hordeum vulgare	MeJA-responsive
DlMYB116	CGTCA-motif	CGTCA	1649	5	+	Hordeum vulgare	MeJA-responsive
DlMYB116	TGACG-motif	TGACG	1174	5	+	Hordeum vulgare	MeJA-responsive
DlMYB116	TGACG-motif	TGACG	1649	5	-	Hordeum vulgare	MeJA-responsive
DlMYB12	TGACG-motif	TGACG	1407	5	-	Hordeum vulgare	MeJA-responsive
DlMYB12	CGTCA-motif	CGTCA	1407	5	+	Hordeum vulgare	MeJA-responsive
DlMYB13	TGACG-motif	TGACG	1564	5	-	Hordeum vulgare	MeJA-responsive
DlMYB13	CGTCA-motif	CGTCA	1564	5	+	Hordeum vulgare	MeJA-responsive
DlMYB14	TGACG-motif	TGACG	1228	5	+	Hordeum vulgare	MeJA-responsive
DlMYB14	TGACG-motif	TGACG	1848	5	+	Hordeum vulgare	MeJA-responsive
DlMYB14	CGTCA-motif	CGTCA	1228	5	-	Hordeum vulgare	MeJA-responsive
DlMYB14	CGTCA-motif	CGTCA	1848	5	-	Hordeum vulgare	MeJA-responsive
DlMYB15	TGACG-motif	TGACG	1228	5	+	Hordeum vulgare	MeJA-responsive
DlMYB15	TGACG-motif	TGACG	1848	5	+	Hordeum vulgare	MeJA-responsive
DlMYB15	CGTCA-motif	CGTCA	1228	5	-	Hordeum vulgare	MeJA-responsive
DlMYB15	CGTCA-motif	CGTCA	1848	5	-	Hordeum vulgare	MeJA-responsive
DlMYB16	TGACG-motif	TGACG	133	5	+	Hordeum vulgare	MeJA-responsive
DlMYB16	CGTCA-motif	CGTCA	133	5	-	Hordeum vulgare	MeJA-responsive
DlMYB17	TGACG-motif	TGACG	7	5	-	Hordeum vulgare	MeJA-responsive
DlMYB17	TGACG-motif	TGACG	404	5	-	Hordeum vulgare	MeJA-responsive
DlMYB17	TGACG-motif	TGACG	1300	5	+	Hordeum vulgare	MeJA-responsive
DlMYB17	TGACG-motif	TGACG	1529	5	-	Hordeum vulgare	MeJA-responsive
DlMYB17	CGTCA-motif	CGTCA	7	5	+	Hordeum vulgare	MeJA-responsive
DlMYB17	CGTCA-motif	CGTCA	404	5	+	Hordeum vulgare	MeJA-responsive
DlMYB17	CGTCA-motif	CGTCA	1300	5	-	Hordeum vulgare	MeJA-responsive
DlMYB17	CGTCA-motif	CGTCA	1529	5	+	Hordeum vulgare	MeJA-responsive
DlMYB19	CGTCA-motif	CGTCA	1282	5	+	Hordeum vulgare	MeJA-responsive
DlMYB19	TGACG-motif	TGACG	1282	5	-	Hordeum vulgare	MeJA-responsive
DlMYB21	CGTCA-motif	CGTCA	228	5	+	Hordeum vulgare	MeJA-responsive
DlMYB21	CGTCA-motif	CGTCA	829	5	+	Hordeum vulgare	MeJA-responsive
DlMYB21	TGACG-motif	TGACG	228	5	-	Hordeum vulgare	MeJA-responsive
DlMYB21	TGACG-motif	TGACG	829	5	-	Hordeum vulgare	MeJA-responsive
DlMYB24	TGACG-motif	TGACG	1266	5	-	Hordeum vulgare	MeJA-responsive
DlMYB24	CGTCA-motif	CGTCA	1266	5	+	Hordeum vulgare	MeJA-responsive
DlMYB25	TGACG-motif	TGACG	1274	5	-	Hordeum vulgare	MeJA-responsive
DlMYB25	CGTCA-motif	CGTCA	1274	5	+	Hordeum vulgare	MeJA-responsive
DlMYB26	TGACG-motif	TGACG	893	5	-	Hordeum vulgare	MeJA-responsive
DlMYB26	CGTCA-motif	CGTCA	893	5	+	Hordeum vulgare	MeJA-responsive
DlMYB27	TGACG-motif	TGACG	1134	5	+	Hordeum vulgare	MeJA-responsive
DlMYB27	CGTCA-motif	CGTCA	1134	5	-	Hordeum vulgare	MeJA-responsive
DlMYB3	TGACG-motif	TGACG	69	5	+	Hordeum vulgare	MeJA-responsive
DlMYB3	TGACG-motif	TGACG	130	5	+	Hordeum vulgare	MeJA-responsive
DlMYB3	CGTCA-motif	CGTCA	69	5	-	Hordeum vulgare	MeJA-responsive
DlMYB3	CGTCA-motif	CGTCA	130	5	-	Hordeum vulgare	MeJA-responsive
DlMYB30	CGTCA-motif	CGTCA	645	5	-	Hordeum vulgare	MeJA-responsive
DlMYB30	CGTCA-motif	CGTCA	791	5	+	Hordeum vulgare	MeJA-responsive
DlMYB30	CGTCA-motif	CGTCA	1430	5	+	Hordeum vulgare	MeJA-responsive
DlMYB30	CGTCA-motif	CGTCA	1807	5	+	Hordeum vulgare	MeJA-responsive
DlMYB30	TGACG-motif	TGACG	645	5	+	Hordeum vulgare	MeJA-responsive
DlMYB30	TGACG-motif	TGACG	791	5	-	Hordeum vulgare	MeJA-responsive
DlMYB30	TGACG-motif	TGACG	1430	5	-	Hordeum vulgare	MeJA-responsive
DlMYB30	TGACG-motif	TGACG	1807	5	-	Hordeum vulgare	MeJA-responsive
DlMYB31	TGACG-motif	TGACG	1242	5	-	Hordeum vulgare	MeJA-responsive
DlMYB31	TGACG-motif	TGACG	1681	5	-	Hordeum vulgare	MeJA-responsive
DlMYB31	CGTCA-motif	CGTCA	1242	5	+	Hordeum vulgare	MeJA-responsive
DlMYB31	CGTCA-motif	CGTCA	1681	5	+	Hordeum vulgare	MeJA-responsive
DlMYB32	CGTCA-motif	CGTCA	560	5	+	Hordeum vulgare	MeJA-responsive
DlMYB32	TGACG-motif	TGACG	560	5	-	Hordeum vulgare	MeJA-responsive
DlMYB33	CGTCA-motif	CGTCA	363	5	-	Hordeum vulgare	MeJA-responsive
DlMYB33	TGACG-motif	TGACG	363	5	+	Hordeum vulgare	MeJA-responsive
DlMYB34	CGTCA-motif	CGTCA	1749	5	-	Hordeum vulgare	MeJA-responsive
DlMYB34	TGACG-motif	TGACG	1749	5	+	Hordeum vulgare	MeJA-responsive
DlMYB36	CGTCA-motif	CGTCA	485	5	+	Hordeum vulgare	MeJA-responsive
DlMYB36	CGTCA-motif	CGTCA	931	5	-	Hordeum vulgare	MeJA-responsive
DlMYB36	CGTCA-motif	CGTCA	1018	5	+	Hordeum vulgare	MeJA-responsive
DlMYB36	CGTCA-motif	CGTCA	1061	5	-	Hordeum vulgare	MeJA-responsive
DlMYB36	CGTCA-motif	CGTCA	1159	5	+	Hordeum vulgare	MeJA-responsive
DlMYB36	TGACG-motif	TGACG	485	5	-	Hordeum vulgare	MeJA-responsive
DlMYB36	TGACG-motif	TGACG	931	5	+	Hordeum vulgare	MeJA-responsive
DlMYB36	TGACG-motif	TGACG	1018	5	-	Hordeum vulgare	MeJA-responsive
DlMYB36	TGACG-motif	TGACG	1061	5	+	Hordeum vulgare	MeJA-responsive
DlMYB36	TGACG-motif	TGACG	1159	5	-	Hordeum vulgare	MeJA-responsive
DlMYB38	CGTCA-motif	CGTCA	1717	5	+	Hordeum vulgare	MeJA-responsive
DlMYB38	TGACG-motif	TGACG	1717	5	-	Hordeum vulgare	MeJA-responsive
DlMYB39	TGACG-motif	TGACG	1876	5	-	Hordeum vulgare	MeJA-responsive
DlMYB39	CGTCA-motif	CGTCA	1876	5	+	Hordeum vulgare	MeJA-responsive
DlMYB4	CGTCA-motif	CGTCA	575	5	-	Hordeum vulgare	MeJA-responsive
DlMYB4	CGTCA-motif	CGTCA	908	5	+	Hordeum vulgare	MeJA-responsive
DlMYB4	CGTCA-motif	CGTCA	1315	5	-	Hordeum vulgare	MeJA-responsive
DlMYB4	CGTCA-motif	CGTCA	1361	5	+	Hordeum vulgare	MeJA-responsive
DlMYB4	TGACG-motif	TGACG	575	5	+	Hordeum vulgare	MeJA-responsive
DlMYB4	TGACG-motif	TGACG	908	5	-	Hordeum vulgare	MeJA-responsive
DlMYB4	TGACG-motif	TGACG	1315	5	+	Hordeum vulgare	MeJA-responsive
DlMYB4	TGACG-motif	TGACG	1361	5	-	Hordeum vulgare	MeJA-responsive
DlMYB40	CGTCA-motif	CGTCA	1772	5	+	Hordeum vulgare	MeJA-responsive
DlMYB40	TGACG-motif	TGACG	1772	5	-	Hordeum vulgare	MeJA-responsive
DlMYB41	CGTCA-motif	CGTCA	74	5	-	Hordeum vulgare	MeJA-responsive
DlMYB41	CGTCA-motif	CGTCA	1820	5	+	Hordeum vulgare	MeJA-responsive
DlMYB41	TGACG-motif	TGACG	74	5	+	Hordeum vulgare	MeJA-responsive
DlMYB41	TGACG-motif	TGACG	1820	5	-	Hordeum vulgare	MeJA-responsive
DlMYB43	TGACG-motif	TGACG	217	5	-	Hordeum vulgare	MeJA-responsive
DlMYB43	CGTCA-motif	CGTCA	217	5	+	Hordeum vulgare	MeJA-responsive
DlMYB44	CGTCA-motif	CGTCA	1210	5	-	Hordeum vulgare	MeJA-responsive
DlMYB44	TGACG-motif	TGACG	1210	5	+	Hordeum vulgare	MeJA-responsive
DlMYB47	TGACG-motif	TGACG	427	5	+	Hordeum vulgare	MeJA-responsive
DlMYB47	CGTCA-motif	CGTCA	427	5	-	Hordeum vulgare	MeJA-responsive
DlMYB48	CGTCA-motif	CGTCA	910	5	+	Hordeum vulgare	MeJA-responsive
DlMYB48	TGACG-motif	TGACG	910	5	-	Hordeum vulgare	MeJA-responsive
DlMYB50	CGTCA-motif	CGTCA	297	5	-	Hordeum vulgare	MeJA-responsive
DlMYB50	CGTCA-motif	CGTCA	769	5	-	Hordeum vulgare	MeJA-responsive
DlMYB50	CGTCA-motif	CGTCA	869	5	+	Hordeum vulgare	MeJA-responsive
DlMYB50	CGTCA-motif	CGTCA	1549	5	-	Hordeum vulgare	MeJA-responsive
DlMYB50	TGACG-motif	TGACG	297	5	+	Hordeum vulgare	MeJA-responsive
DlMYB50	TGACG-motif	TGACG	769	5	+	Hordeum vulgare	MeJA-responsive
DlMYB50	TGACG-motif	TGACG	869	5	-	Hordeum vulgare	MeJA-responsive
DlMYB50	TGACG-motif	TGACG	1549	5	+	Hordeum vulgare	MeJA-responsive
DlMYB51	CGTCA-motif	CGTCA	1902	5	+	Hordeum vulgare	MeJA-responsive
DlMYB51	TGACG-motif	TGACG	1902	5	-	Hordeum vulgare	MeJA-responsive
DlMYB52	TGACG-motif	TGACG	1907	5	+	Hordeum vulgare	MeJA-responsive
DlMYB52	CGTCA-motif	CGTCA	1907	5	-	Hordeum vulgare	MeJA-responsive
DlMYB54	TGACG-motif	TGACG	258	5	-	Hordeum vulgare	MeJA-responsive
DlMYB54	CGTCA-motif	CGTCA	258	5	+	Hordeum vulgare	MeJA-responsive
DlMYB55	CGTCA-motif	CGTCA	1897	5	+	Hordeum vulgare	MeJA-responsive
DlMYB55	TGACG-motif	TGACG	1897	5	-	Hordeum vulgare	MeJA-responsive
DlMYB56	CGTCA-motif	CGTCA	367	5	+	Hordeum vulgare	MeJA-responsive
DlMYB56	CGTCA-motif	CGTCA	1792	5	-	Hordeum vulgare	MeJA-responsive
DlMYB56	TGACG-motif	TGACG	367	5	-	Hordeum vulgare	MeJA-responsive
DlMYB56	TGACG-motif	TGACG	1792	5	+	Hordeum vulgare	MeJA-responsive
DlMYB57	CGTCA-motif	CGTCA	344	5	-	Hordeum vulgare	MeJA-responsive
DlMYB57	CGTCA-motif	CGTCA	797	5	+	Hordeum vulgare	MeJA-responsive
DlMYB57	TGACG-motif	TGACG	344	5	+	Hordeum vulgare	MeJA-responsive
DlMYB57	TGACG-motif	TGACG	797	5	-	Hordeum vulgare	MeJA-responsive
DlMYB58	CGTCA-motif	CGTCA	273	5	+	Hordeum vulgare	MeJA-responsive
DlMYB58	CGTCA-motif	CGTCA	1102	5	+	Hordeum vulgare	MeJA-responsive
DlMYB58	TGACG-motif	TGACG	273	5	-	Hordeum vulgare	MeJA-responsive
DlMYB58	TGACG-motif	TGACG	1102	5	-	Hordeum vulgare	MeJA-responsive
DlMYB59	CGTCA-motif	CGTCA	226	5	+	Hordeum vulgare	MeJA-responsive
DlMYB59	CGTCA-motif	CGTCA	640	5	+	Hordeum vulgare	MeJA-responsive
DlMYB59	TGACG-motif	TGACG	226	5	-	Hordeum vulgare	MeJA-responsive
DlMYB59	TGACG-motif	TGACG	640	5	-	Hordeum vulgare	MeJA-responsive
DlMYB6	CGTCA-motif	CGTCA	1751	5	-	Hordeum vulgare	MeJA-responsive
DlMYB6	TGACG-motif	TGACG	1751	5	+	Hordeum vulgare	MeJA-responsive
DlMYB62	TGACG-motif	TGACG	378	5	+	Hordeum vulgare	MeJA-responsive
DlMYB62	TGACG-motif	TGACG	1045	5	+	Hordeum vulgare	MeJA-responsive
DlMYB62	CGTCA-motif	CGTCA	378	5	-	Hordeum vulgare	MeJA-responsive
DlMYB62	CGTCA-motif	CGTCA	1045	5	-	Hordeum vulgare	MeJA-responsive
DlMYB64	CGTCA-motif	CGTCA	1047	5	-	Hordeum vulgare	MeJA-responsive
DlMYB64	TGACG-motif	TGACG	1047	5	+	Hordeum vulgare	MeJA-responsive
DlMYB67	CGTCA-motif	CGTCA	292	5	-	Hordeum vulgare	MeJA-responsive
DlMYB67	CGTCA-motif	CGTCA	1623	5	-	Hordeum vulgare	MeJA-responsive
DlMYB67	CGTCA-motif	CGTCA	1709	5	-	Hordeum vulgare	MeJA-responsive
DlMYB67	TGACG-motif	TGACG	292	5	+	Hordeum vulgare	MeJA-responsive
DlMYB67	TGACG-motif	TGACG	1623	5	+	Hordeum vulgare	MeJA-responsive
DlMYB67	TGACG-motif	TGACG	1709	5	+	Hordeum vulgare	MeJA-responsive
DlMYB68	TGACG-motif	TGACG	1255	5	+	Hordeum vulgare	MeJA-responsive
DlMYB68	TGACG-motif	TGACG	1949	5	-	Hordeum vulgare	MeJA-responsive
DlMYB68	CGTCA-motif	CGTCA	1255	5	-	Hordeum vulgare	MeJA-responsive
DlMYB68	CGTCA-motif	CGTCA	1949	5	+	Hordeum vulgare	MeJA-responsive
DlMYB7	CGTCA-motif	CGTCA	1290	5	+	Hordeum vulgare	MeJA-responsive
DlMYB7	CGTCA-motif	CGTCA	1844	5	-	Hordeum vulgare	MeJA-responsive
DlMYB7	TGACG-motif	TGACG	1290	5	-	Hordeum vulgare	MeJA-responsive
DlMYB7	TGACG-motif	TGACG	1844	5	+	Hordeum vulgare	MeJA-responsive
DlMYB70	TGACG-motif	TGACG	101	5	+	Hordeum vulgare	MeJA-responsive
DlMYB70	TGACG-motif	TGACG	1236	5	-	Hordeum vulgare	MeJA-responsive
DlMYB70	TGACG-motif	TGACG	1573	5	+	Hordeum vulgare	MeJA-responsive
DlMYB70	CGTCA-motif	CGTCA	101	5	-	Hordeum vulgare	MeJA-responsive
DlMYB70	CGTCA-motif	CGTCA	1236	5	+	Hordeum vulgare	MeJA-responsive
DlMYB70	CGTCA-motif	CGTCA	1573	5	-	Hordeum vulgare	MeJA-responsive
DlMYB71	TGACG-motif	TGACG	259	5	+	Hordeum vulgare	MeJA-responsive
DlMYB71	CGTCA-motif	CGTCA	259	5	-	Hordeum vulgare	MeJA-responsive
DlMYB72	CGTCA-motif	CGTCA	149	5	-	Hordeum vulgare	MeJA-responsive
DlMYB72	TGACG-motif	TGACG	149	5	+	Hordeum vulgare	MeJA-responsive
DlMYB73	CGTCA-motif	CGTCA	1066	5	-	Hordeum vulgare	MeJA-responsive
DlMYB73	TGACG-motif	TGACG	1066	5	+	Hordeum vulgare	MeJA-responsive
DlMYB74	TGACG-motif	TGACG	353	5	+	Hordeum vulgare	MeJA-responsive
DlMYB74	TGACG-motif	TGACG	686	5	-	Hordeum vulgare	MeJA-responsive
DlMYB74	TGACG-motif	TGACG	761	5	-	Hordeum vulgare	MeJA-responsive
DlMYB74	TGACG-motif	TGACG	1313	5	+	Hordeum vulgare	MeJA-responsive
DlMYB74	CGTCA-motif	CGTCA	353	5	-	Hordeum vulgare	MeJA-responsive
DlMYB74	CGTCA-motif	CGTCA	686	5	+	Hordeum vulgare	MeJA-responsive
DlMYB74	CGTCA-motif	CGTCA	761	5	+	Hordeum vulgare	MeJA-responsive
DlMYB74	CGTCA-motif	CGTCA	1313	5	-	Hordeum vulgare	MeJA-responsive
DlMYB75	CGTCA-motif	CGTCA	1937	5	+	Hordeum vulgare	MeJA-responsive
DlMYB75	TGACG-motif	TGACG	1937	5	-	Hordeum vulgare	MeJA-responsive
DlMYB76	CGTCA-motif	CGTCA	706	5	-	Hordeum vulgare	MeJA-responsive
DlMYB76	CGTCA-motif	CGTCA	753	5	+	Hordeum vulgare	MeJA-responsive
DlMYB76	TGACG-motif	TGACG	706	5	+	Hordeum vulgare	MeJA-responsive
DlMYB76	TGACG-motif	TGACG	753	5	-	Hordeum vulgare	MeJA-responsive
DlMYB79	CGTCA-motif	CGTCA	1958	5	+	Hordeum vulgare	MeJA-responsive
DlMYB79	TGACG-motif	TGACG	1958	5	-	Hordeum vulgare	MeJA-responsive
DlMYB81	CGTCA-motif	CGTCA	1621	5	-	Hordeum vulgare	MeJA-responsive
DlMYB81	TGACG-motif	TGACG	1621	5	+	Hordeum vulgare	MeJA-responsive
DlMYB82	CGTCA-motif	CGTCA	1848	5	+	Hordeum vulgare	MeJA-responsive
DlMYB82	TGACG-motif	TGACG	1848	5	-	Hordeum vulgare	MeJA-responsive
DlMYB83	TGACG-motif	TGACG	1488	5	+	Hordeum vulgare	MeJA-responsive
DlMYB83	CGTCA-motif	CGTCA	1488	5	-	Hordeum vulgare	MeJA-responsive
DlMYB84	TGACG-motif	TGACG	315	5	+	Hordeum vulgare	MeJA-responsive
DlMYB84	TGACG-motif	TGACG	1334	5	-	Hordeum vulgare	MeJA-responsive
DlMYB84	CGTCA-motif	CGTCA	315	5	-	Hordeum vulgare	MeJA-responsive
DlMYB84	CGTCA-motif	CGTCA	1334	5	+	Hordeum vulgare	MeJA-responsive
DlMYB86	TGACG-motif	TGACG	920	5	+	Hordeum vulgare	MeJA-responsive
DlMYB86	TGACG-motif	TGACG	964	5	+	Hordeum vulgare	MeJA-responsive
DlMYB86	TGACG-motif	TGACG	1561	5	-	Hordeum vulgare	MeJA-responsive
DlMYB86	CGTCA-motif	CGTCA	920	5	-	Hordeum vulgare	MeJA-responsive
DlMYB86	CGTCA-motif	CGTCA	964	5	-	Hordeum vulgare	MeJA-responsive
DlMYB86	CGTCA-motif	CGTCA	1561	5	+	Hordeum vulgare	MeJA-responsive
DlMYB87	TGACG-motif	TGACG	241	5	+	Hordeum vulgare	MeJA-responsive
DlMYB87	CGTCA-motif	CGTCA	241	5	-	Hordeum vulgare	MeJA-responsive
DlMYB88	CGTCA-motif	CGTCA	1723	5	-	Hordeum vulgare	MeJA-responsive
DlMYB88	TGACG-motif	TGACG	1723	5	+	Hordeum vulgare	MeJA-responsive
DlMYB9	CGTCA-motif	CGTCA	443	5	+	Hordeum vulgare	MeJA-responsive
DlMYB9	CGTCA-motif	CGTCA	940	5	-	Hordeum vulgare	MeJA-responsive
DlMYB9	TGACG-motif	TGACG	443	5	-	Hordeum vulgare	MeJA-responsive
DlMYB9	TGACG-motif	TGACG	940	5	+	Hordeum vulgare	MeJA-responsive
DlMYB90	TGACG-motif	TGACG	206	5	-	Hordeum vulgare	MeJA-responsive
DlMYB90	TGACG-motif	TGACG	1425	5	+	Hordeum vulgare	MeJA-responsive
DlMYB90	CGTCA-motif	CGTCA	206	5	+	Hordeum vulgare	MeJA-responsive
DlMYB90	CGTCA-motif	CGTCA	1425	5	-	Hordeum vulgare	MeJA-responsive
DlMYB91	CGTCA-motif	CGTCA	648	5	-	Hordeum vulgare	MeJA-responsive
DlMYB91	CGTCA-motif	CGTCA	841	5	-	Hordeum vulgare	MeJA-responsive
DlMYB91	TGACG-motif	TGACG	648	5	+	Hordeum vulgare	MeJA-responsive
DlMYB91	TGACG-motif	TGACG	841	5	+	Hordeum vulgare	MeJA-responsive
DlMYB92	TGACG-motif	TGACG	173	5	-	Hordeum vulgare	MeJA-responsive
DlMYB92	CGTCA-motif	CGTCA	173	5	+	Hordeum vulgare	MeJA-responsive
DlMYB93	CGTCA-motif	CGTCA	1595	5	+	Hordeum vulgare	MeJA-responsive
DlMYB93	TGACG-motif	TGACG	1595	5	-	Hordeum vulgare	MeJA-responsive
DlMYB94	TGACG-motif	TGACG	525	5	+	Hordeum vulgare	MeJA-responsive
DlMYB94	TGACG-motif	TGACG	899	5	-	Hordeum vulgare	MeJA-responsive
DlMYB94	CGTCA-motif	CGTCA	525	5	-	Hordeum vulgare	MeJA-responsive
DlMYB94	CGTCA-motif	CGTCA	899	5	+	Hordeum vulgare	MeJA-responsive
DlMYB96	TGACG-motif	TGACG	619	5	+	Hordeum vulgare	MeJA-responsive
DlMYB96	TGACG-motif	TGACG	688	5	-	Hordeum vulgare	MeJA-responsive
DlMYB96	CGTCA-motif	CGTCA	619	5	-	Hordeum vulgare	MeJA-responsive
DlMYB96	CGTCA-motif	CGTCA	688	5	+	Hordeum vulgare	MeJA-responsive
DlMYB98	CGTCA-motif	CGTCA	1520	5	-	Hordeum vulgare	MeJA-responsive
DlMYB98	TGACG-motif	TGACG	1520	5	+	Hordeum vulgare	MeJA-responsive
DlMYB1	CAT-box	GCCACT	1416	6	+	Arabidopsis thaliana	meristem expression
DlMYB102	CAT-box	GCCACT	477	6	+	Arabidopsis thaliana	meristem expression
DlMYB104	CAT-box	GCCACT	1197	6	-	Arabidopsis thaliana	meristem expression
DlMYB109	CAT-box	GCCACT	393	6	+	Arabidopsis thaliana	meristem expression
DlMYB12	CAT-box	GCCACT	756	6	-	Arabidopsis thaliana	meristem expression
DlMYB13	CAT-box	GCCACT	489	6	-	Arabidopsis thaliana	meristem expression
DlMYB14	CAT-box	GCCACT	1667	6	+	Arabidopsis thaliana	meristem expression
DlMYB15	CAT-box	GCCACT	1667	6	+	Arabidopsis thaliana	meristem expression
DlMYB21	CAT-box	GCCACT	1788	6	+	Arabidopsis thaliana	meristem expression
DlMYB22	CAT-box	GCCACT	32	6	+	Arabidopsis thaliana	meristem expression
DlMYB24	CAT-box	GCCACT	1177	6	+	Arabidopsis thaliana	meristem expression
DlMYB25	CAT-box	GCCACT	1185	6	+	Arabidopsis thaliana	meristem expression
DlMYB27	CAT-box	GCCACT	521	6	+	Arabidopsis thaliana	meristem expression
DlMYB3	CAT-box	GCCACT	226	6	-	Arabidopsis thaliana	meristem expression
DlMYB32	CAT-box	GCCACT	1813	6	+	Arabidopsis thaliana	meristem expression
DlMYB33	CAT-box	GCCACT	1768	6	+	Arabidopsis thaliana	meristem expression
DlMYB36	CAT-box	GCCACT	764	6	+	Arabidopsis thaliana	meristem expression
DlMYB44	CAT-box	GCCACT	196	6	-	Arabidopsis thaliana	meristem expression
DlMYB44	CAT-box	GCCACT	533	6	+	Arabidopsis thaliana	meristem expression
DlMYB48	CAT-box	GCCACT	1676	6	+	Arabidopsis thaliana	meristem expression
DlMYB57	CAT-box	GCCACT	1804	6	+	Arabidopsis thaliana	meristem expression
DlMYB58	CAT-box	GCCACT	316	6	-	Arabidopsis thaliana	meristem expression
DlMYB59	CAT-box	GCCACT	1471	6	+	Arabidopsis thaliana	meristem expression
DlMYB62	CAT-box	GCCACT	520	6	+	Arabidopsis thaliana	meristem expression
DlMYB64	CAT-box	GCCACT	275	6	-	Arabidopsis thaliana	meristem expression
DlMYB7	CAT-box	GCCACT	1861	6	-	Arabidopsis thaliana	meristem expression
DlMYB70	CAT-box	GCCACT	639	6	-	Arabidopsis thaliana	meristem expression
DlMYB70	CAT-box	GCCACT	1651	6	+	Arabidopsis thaliana	meristem expression
DlMYB76	CAT-box	GCCACT	932	6	+	Arabidopsis thaliana	meristem expression
DlMYB76	CAT-box	GCCACT	1390	6	-	Arabidopsis thaliana	meristem expression
DlMYB77	CAT-box	GCCACT	251	6	+	Arabidopsis thaliana	meristem expression
DlMYB79	CAT-box	GCCACT	94	6	-	Arabidopsis thaliana	meristem expression
DlMYB79	CAT-box	GCCACT	360	6	+	Arabidopsis thaliana	meristem expression
DlMYB79	CAT-box	GCCACT	1632	6	+	Arabidopsis thaliana	meristem expression
DlMYB83	CAT-box	GCCACT	1767	6	+	Arabidopsis thaliana	meristem expression
DlMYB83	CAT-box	GCCACT	1951	6	+	Arabidopsis thaliana	meristem expression
DlMYB9	CAT-box	GCCACT	760	6	-	Arabidopsis thaliana	meristem expression
DlMYB9	CAT-box	GCCACT	821	6	+	Arabidopsis thaliana	meristem expression
DlMYB91	CAT-box	GCCACT	643	6	+	Arabidopsis thaliana	meristem expression
DlMYB92	CAT-box	GCCACT	446	6	+	Arabidopsis thaliana	meristem expression
DlMYB92	CAT-box	GCCACT	1055	6	+	Arabidopsis thaliana	meristem expression
DlMYB97	CAT-box	GCCACT	1365	6	+	Arabidopsis thaliana	meristem expression
DlMYB1	MBS	CAACTG	1319	6	-	Arabidopsis thaliana	MYB binding site involved in drought-inducibility
DlMYB100	MBS	CAACTG	792	6	-	Arabidopsis thaliana	MYB binding site involved in drought-inducibility
DlMYB101	MBS	CAACTG	157	6	+	Arabidopsis thaliana	MYB binding site involved in drought-inducibility
DlMYB101	MBS	CAACTG	1467	6	+	Arabidopsis thaliana	MYB binding site involved in drought-inducibility
DlMYB102	MBS	CAACTG	1795	6	+	Arabidopsis thaliana	MYB binding site involved in drought-inducibility
DlMYB105	MBS	CAACTG	970	6	+	Arabidopsis thaliana	MYB binding site involved in drought-inducibility
DlMYB105	MBS	CAACTG	1924	6	-	Arabidopsis thaliana	MYB binding site involved in drought-inducibility
DlMYB106	MBS	CAACTG	1692	6	-	Arabidopsis thaliana	MYB binding site involved in drought-inducibility
DlMYB11	MBS	CAACTG	1041	6	+	Arabidopsis thaliana	MYB binding site involved in drought-inducibility
DlMYB111	MBS	CAACTG	185	6	-	Arabidopsis thaliana	MYB binding site involved in drought-inducibility
DlMYB111	MBS	CAACTG	1098	6	+	Arabidopsis thaliana	MYB binding site involved in drought-inducibility
DlMYB111	MBS	CAACTG	1878	6	+	Arabidopsis thaliana	MYB binding site involved in drought-inducibility
DlMYB112	MBS	CAACTG	1954	6	-	Arabidopsis thaliana	MYB binding site involved in drought-inducibility
DlMYB113	MBS	CAACTG	1803	6	-	Arabidopsis thaliana	MYB binding site involved in drought-inducibility
DlMYB115	MBS	CAACTG	941	6	+	Arabidopsis thaliana	MYB binding site involved in drought-inducibility
DlMYB115	MBS	CAACTG	1820	6	+	Arabidopsis thaliana	MYB binding site involved in drought-inducibility
DlMYB117	MBS	CAACTG	588	6	+	Arabidopsis thaliana	MYB binding site involved in drought-inducibility
DlMYB118	MBS	CAACTG	1818	6	-	Arabidopsis thaliana	MYB binding site involved in drought-inducibility
DlMYB119	MBS	CAACTG	1524	6	-	Arabidopsis thaliana	MYB binding site involved in drought-inducibility
DlMYB12	MBS	CAACTG	725	6	-	Arabidopsis thaliana	MYB binding site involved in drought-inducibility
DlMYB14	MBS	CAACTG	1363	6	+	Arabidopsis thaliana	MYB binding site involved in drought-inducibility
DlMYB15	MBS	CAACTG	1363	6	+	Arabidopsis thaliana	MYB binding site involved in drought-inducibility
DlMYB17	MBS	CAACTG	198	6	-	Arabidopsis thaliana	MYB binding site involved in drought-inducibility
DlMYB17	MBS	CAACTG	1315	6	-	Arabidopsis thaliana	MYB binding site involved in drought-inducibility
DlMYB18	MBS	CAACTG	548	6	+	Arabidopsis thaliana	MYB binding site involved in drought-inducibility
DlMYB19	MBS	CAACTG	199	6	-	Arabidopsis thaliana	MYB binding site involved in drought-inducibility
DlMYB19	MBS	CAACTG	1051	6	-	Arabidopsis thaliana	MYB binding site involved in drought-inducibility
DlMYB20	MBS	CAACTG	227	6	-	Arabidopsis thaliana	MYB binding site involved in drought-inducibility
DlMYB20	MBS	CAACTG	1079	6	-	Arabidopsis thaliana	MYB binding site involved in drought-inducibility
DlMYB21	MBS	CAACTG	821	6	+	Arabidopsis thaliana	MYB binding site involved in drought-inducibility
DlMYB21	MBS	CAACTG	1229	6	-	Arabidopsis thaliana	MYB binding site involved in drought-inducibility
DlMYB21	MBS	CAACTG	1783	6	-	Arabidopsis thaliana	MYB binding site involved in drought-inducibility
DlMYB22	MBS	CAACTG	357	6	+	Arabidopsis thaliana	MYB binding site involved in drought-inducibility
DlMYB22	MBS	CAACTG	952	6	-	Arabidopsis thaliana	MYB binding site involved in drought-inducibility
DlMYB23	MBS	CAACTG	1054	6	-	Arabidopsis thaliana	MYB binding site involved in drought-inducibility
DlMYB23	MBS	CAACTG	1778	6	+	Arabidopsis thaliana	MYB binding site involved in drought-inducibility
DlMYB3	MBS	CAACTG	42	6	-	Arabidopsis thaliana	MYB binding site involved in drought-inducibility
DlMYB3	MBS	CAACTG	688	6	+	Arabidopsis thaliana	MYB binding site involved in drought-inducibility
DlMYB3	MBS	CAACTG	1330	6	+	Arabidopsis thaliana	MYB binding site involved in drought-inducibility
DlMYB30	MBS	CAACTG	1067	6	+	Arabidopsis thaliana	MYB binding site involved in drought-inducibility
DlMYB32	MBS	CAACTG	206	6	+	Arabidopsis thaliana	MYB binding site involved in drought-inducibility
DlMYB33	MBS	CAACTG	1648	6	+	Arabidopsis thaliana	MYB binding site involved in drought-inducibility
DlMYB36	MBS	CAACTG	177	6	+	Arabidopsis thaliana	MYB binding site involved in drought-inducibility
DlMYB36	MBS	CAACTG	1053	6	-	Arabidopsis thaliana	MYB binding site involved in drought-inducibility
DlMYB42	MBS	CAACTG	1697	6	+	Arabidopsis thaliana	MYB binding site involved in drought-inducibility
DlMYB43	MBS	CAACTG	1568	6	+	Arabidopsis thaliana	MYB binding site involved in drought-inducibility
DlMYB44	MBS	CAACTG	1523	6	-	Arabidopsis thaliana	MYB binding site involved in drought-inducibility
DlMYB47	MBS	CAACTG	566	6	+	Arabidopsis thaliana	MYB binding site involved in drought-inducibility
DlMYB48	MBS	CAACTG	732	6	-	Arabidopsis thaliana	MYB binding site involved in drought-inducibility
DlMYB5	MBS	CAACTG	1865	6	+	Arabidopsis thaliana	MYB binding site involved in drought-inducibility
DlMYB5	MBS	CAACTG	1889	6	+	Arabidopsis thaliana	MYB binding site involved in drought-inducibility
DlMYB50	MBS	CAACTG	477	6	+	Arabidopsis thaliana	MYB binding site involved in drought-inducibility
DlMYB52	MBS	CAACTG	560	6	-	Arabidopsis thaliana	MYB binding site involved in drought-inducibility
DlMYB53	MBS	CAACTG	129	6	+	Arabidopsis thaliana	MYB binding site involved in drought-inducibility
DlMYB54	MBS	CAACTG	997	6	-	Arabidopsis thaliana	MYB binding site involved in drought-inducibility
DlMYB55	MBS	CAACTG	224	6	+	Arabidopsis thaliana	MYB binding site involved in drought-inducibility
DlMYB59	MBS	CAACTG	1329	6	-	Arabidopsis thaliana	MYB binding site involved in drought-inducibility
DlMYB62	MBS	CAACTG	480	6	+	Arabidopsis thaliana	MYB binding site involved in drought-inducibility
DlMYB63	MBS	CAACTG	114	6	+	Arabidopsis thaliana	MYB binding site involved in drought-inducibility
DlMYB65	MBS	CAACTG	114	6	+	Arabidopsis thaliana	MYB binding site involved in drought-inducibility
DlMYB66	MBS	CAACTG	60	6	+	Arabidopsis thaliana	MYB binding site involved in drought-inducibility
DlMYB67	MBS	CAACTG	1645	6	+	Arabidopsis thaliana	MYB binding site involved in drought-inducibility
DlMYB69	MBS	CAACTG	280	6	-	Arabidopsis thaliana	MYB binding site involved in drought-inducibility
DlMYB7	MBS	CAACTG	241	6	+	Arabidopsis thaliana	MYB binding site involved in drought-inducibility
DlMYB72	MBS	CAACTG	1634	6	+	Arabidopsis thaliana	MYB binding site involved in drought-inducibility
DlMYB74	MBS	CAACTG	1137	6	+	Arabidopsis thaliana	MYB binding site involved in drought-inducibility
DlMYB77	MBS	CAACTG	531	6	+	Arabidopsis thaliana	MYB binding site involved in drought-inducibility
DlMYB78	MBS	CAACTG	620	6	+	Arabidopsis thaliana	MYB binding site involved in drought-inducibility
DlMYB78	MBS	CAACTG	1633	6	+	Arabidopsis thaliana	MYB binding site involved in drought-inducibility
DlMYB78	MBS	CAACTG	1788	6	+	Arabidopsis thaliana	MYB binding site involved in drought-inducibility
DlMYB78	MBS	CAACTG	1854	6	+	Arabidopsis thaliana	MYB binding site involved in drought-inducibility
DlMYB83	MBS	CAACTG	1347	6	+	Arabidopsis thaliana	MYB binding site involved in drought-inducibility
DlMYB83	MBS	CAACTG	1481	6	+	Arabidopsis thaliana	MYB binding site involved in drought-inducibility
DlMYB85	MBS	CAACTG	1369	6	-	Arabidopsis thaliana	MYB binding site involved in drought-inducibility
DlMYB85	MBS	CAACTG	1654	6	-	Arabidopsis thaliana	MYB binding site involved in drought-inducibility
DlMYB85	MBS	CAACTG	1994	6	+	Arabidopsis thaliana	MYB binding site involved in drought-inducibility
DlMYB86	MBS	CAACTG	841	6	+	Arabidopsis thaliana	MYB binding site involved in drought-inducibility
DlMYB88	MBS	CAACTG	1715	6	-	Arabidopsis thaliana	MYB binding site involved in drought-inducibility
DlMYB89	MBS	CAACTG	265	6	-	Arabidopsis thaliana	MYB binding site involved in drought-inducibility
DlMYB89	MBS	CAACTG	1537	6	+	Arabidopsis thaliana	MYB binding site involved in drought-inducibility
DlMYB9	MBS	CAACTG	936	6	-	Arabidopsis thaliana	MYB binding site involved in drought-inducibility
DlMYB91	MBS	CAACTG	1351	6	+	Arabidopsis thaliana	MYB binding site involved in drought-inducibility
DlMYB95	MBS	CAACTG	1749	6	-	Arabidopsis thaliana	MYB binding site involved in drought-inducibility
DlMYB98	MBS	CAACTG	969	6	-	Arabidopsis thaliana	MYB binding site involved in drought-inducibility
DlMYB98	MBS	CAACTG	1476	6	-	Arabidopsis thaliana	MYB binding site involved in drought-inducibility
DlMYB101	MBSI	aaaAaaC(G/C)GTTA	119	11	+	Petunia hybrida	flavonoid biosynthetic
DlMYB119	MBSI	aaaAaaC(G/C)GTTA	751	10.5	+	Petunia hybrida	flavonoid biosynthetic
DlMYB19	MBSI	TTTTTACGGTTA	691	11	+	Petunia hybrida	flavonoid biosynthetic
DlMYB20	MBSI	TTTTTACGGTTA	715	11	+	Petunia hybrida	flavonoid biosynthetic
DlMYB35	MBSI	aaaAaaC(G/C)GTTA	1122	11	-	Petunia hybrida	flavonoid biosynthetic
DlMYB36	MBSI	aaaAaaC(G/C)GTTA	1176	10.5	+	Petunia hybrida	flavonoid biosynthetic
DlMYB36	MBSI	aaaAaaC(G/C)GTTA	1697	10.5	+	Petunia hybrida	flavonoid biosynthetic
DlMYB36	MBSI	aaaAaaC(G/C)GTTA	1900	10.5	+	Petunia hybrida	flavonoid biosynthetic
DlMYB44	MBSI	aaaAaaC(G/C)GTTA	728	10.5	+	Petunia hybrida	flavonoid biosynthetic
DlMYB59	MBSI	aaaAaaC(G/C)GTTA	1877	10.5	+	Petunia hybrida	flavonoid biosynthetic
DlMYB66	MBSI	aaaAaaC(G/C)GTTA	366	10.5	-	Petunia hybrida	flavonoid biosynthetic
DlMYB67	MBSI	aaaAaaC(G/C)GTTA	99	10.5	+	Petunia hybrida	flavonoid biosynthetic
DlMYB76	MBSI	aaaAaaC(G/C)GTTA	1757	10.5	+	Petunia hybrida	flavonoid biosynthetic
DlMYB86	MBSI	aaaAaaC(G/C)GTTA	1118	10.5	+	Petunia hybrida	flavonoid biosynthetic
DlMYB91	MBSI	aaaAaaC(G/C)GTTA	1258	10.5	-	Petunia hybrida	flavonoid biosynthetic
DlMYB119	WUN-motif	AAATTTCCT	575	9	+	Brassica oleracea	wound-responsive
DlMYB37	WUN-motif	AAATTTCCT	1200	9	+	Brassica oleracea	wound-responsive
DlMYB55	WUN-motif	AAATTTCCT	1260	9	-	Brassica oleracea	wound-responsive
DlMYB80	WUN-motif	AAATTTCCT	1026	9	-	Brassica oleracea	wound-responsive
DlMYB1	ABRE	CACGTG	498	6	+	Arabidopsis thaliana	ABA responsiveness
DlMYB1	ABRE	ACGTG	499	5	+	Arabidopsis thaliana	ABA responsiveness
DlMYB1	ABRE	ACGTG	1395	5	+	Arabidopsis thaliana	ABA responsiveness
DlMYB1	ABRE	CACGTG	1599	6	-	Arabidopsis thaliana	ABA responsiveness
DlMYB1	ABRE	ACGTG	1600	5	+	Arabidopsis thaliana	ABA responsiveness
DlMYB10	ABRE	ACGTG	19	5	-	Arabidopsis thaliana	ABA responsiveness
DlMYB10	ABRE	ACGTG	1539	5	+	Arabidopsis thaliana	ABA responsiveness
DlMYB10	ABRE	ACGTG	1766	5	-	Arabidopsis thaliana	ABA responsiveness
DlMYB100	ABRE	ACGTG	1174	5	-	Arabidopsis thaliana	ABA responsiveness
DlMYB101	ABRE	ACGTG	68	5	-	Arabidopsis thaliana	ABA responsiveness
DlMYB101	ABRE	CGCACGTGTC	1362	9	-	Hordeum vulgare	ABA responsiveness
DlMYB101	ABRE	CACGTG	1364	6	-	Arabidopsis thaliana	ABA responsiveness
DlMYB101	ABRE	ACGTG	1365	5	+	Arabidopsis thaliana	ABA responsiveness
DlMYB101	ABRE	ACGTG	1819	5	+	Arabidopsis thaliana	ABA responsiveness
DlMYB101	ABRE	ACGTG	1859	5	-	Arabidopsis thaliana	ABA responsiveness
DlMYB102	ABRE	CACGTG	1141	6	-	Arabidopsis thaliana	ABA responsiveness
DlMYB102	ABRE	ACGTG	1142	5	+	Arabidopsis thaliana	ABA responsiveness
DlMYB103	ABRE	AACCCGG	167	7	-	Arabidopsis thaliana	ABA responsiveness
DlMYB103	ABRE	ACGTG	1538	5	+	Arabidopsis thaliana	ABA responsiveness
DlMYB104	ABRE	CACGTG	998	6	+	Arabidopsis thaliana	ABA responsiveness
DlMYB104	ABRE	ACGTG	999	5	+	Arabidopsis thaliana	ABA responsiveness
DlMYB104	ABRE	ACGTG	1346	5	-	Arabidopsis thaliana	ABA responsiveness
DlMYB105	ABRE	GCCGCGTGGC	1637	9	-	Oryza sativa	ABA responsiveness
DlMYB106	ABRE	ACGTG	517	5	-	Arabidopsis thaliana	ABA responsiveness
DlMYB106	ABRE	ACGTG	549	5	-	Arabidopsis thaliana	ABA responsiveness
DlMYB106	ABRE	ACGTG	933	5	+	Arabidopsis thaliana	ABA responsiveness
DlMYB107	ABRE	ACGTG	57	5	-	Arabidopsis thaliana	ABA responsiveness
DlMYB107	ABRE	GCAACGTGTC	64	9	-	Hordeum vulgare	ABA responsiveness
DlMYB107	ABRE	CACGTG	66	6	+	Arabidopsis thaliana	ABA responsiveness
DlMYB107	ABRE	ACGTG	67	5	+	Arabidopsis thaliana	ABA responsiveness
DlMYB107	ABRE	GACACGTGGC	105	9	+	Triticum aestivum	ABA responsiveness
DlMYB107	ABRE	CACGTG	107	6	+	Arabidopsis thaliana	ABA responsiveness
DlMYB107	ABRE	ACGTG	108	5	+	Arabidopsis thaliana	ABA responsiveness
DlMYB107	ABRE	CGCACGTGTC	149	9	+	Hordeum vulgare	ABA responsiveness
DlMYB107	ABRE	CACGTG	151	6	+	Arabidopsis thaliana	ABA responsiveness
DlMYB107	ABRE	ACGTG	152	5	+	Arabidopsis thaliana	ABA responsiveness
DlMYB108	ABRE	ACGTG	528	5	+	Arabidopsis thaliana	ABA responsiveness
DlMYB108	ABRE	ACGTG	908	5	+	Arabidopsis thaliana	ABA responsiveness
DlMYB108	ABRE	ACGTG	1567	5	+	Arabidopsis thaliana	ABA responsiveness
DlMYB108	ABRE	ACGTG	1659	5	+	Arabidopsis thaliana	ABA responsiveness
DlMYB110	ABRE	CACGTG	296	6	+	Arabidopsis thaliana	ABA responsiveness
DlMYB110	ABRE	ACGTG	297	5	+	Arabidopsis thaliana	ABA responsiveness
DlMYB110	ABRE	GACACGTACGT	474	10	+	Oryza sativa	ABA responsiveness
DlMYB110	ABRE	CGCACGTGTC	478	9	+	Hordeum vulgare	ABA responsiveness
DlMYB110	ABRE	CACGTG	480	6	+	Arabidopsis thaliana	ABA responsiveness
DlMYB110	ABRE	ACGTG	481	5	+	Arabidopsis thaliana	ABA responsiveness
DlMYB112	ABRE	CGCACGTGTC	1146	9	+	Hordeum vulgare	ABA responsiveness
DlMYB112	ABRE	CACGTG	1148	6	-	Arabidopsis thaliana	ABA responsiveness
DlMYB112	ABRE	ACGTG	1149	5	+	Arabidopsis thaliana	ABA responsiveness
DlMYB112	ABRE	ACGTG	1559	5	-	Arabidopsis thaliana	ABA responsiveness
DlMYB113	ABRE	CACGTG	1512	6	-	Arabidopsis thaliana	ABA responsiveness
DlMYB113	ABRE	ACGTG	1513	5	+	Arabidopsis thaliana	ABA responsiveness
DlMYB114	ABRE	ACGTG	171	5	-	Arabidopsis thaliana	ABA responsiveness
DlMYB114	ABRE	ACGTG	379	5	+	Arabidopsis thaliana	ABA responsiveness
DlMYB114	ABRE	TACGTGTC	1563	8	-	Oryza sativa	ABA responsiveness
DlMYB114	ABRE	ACGTG	1565	5	-	Arabidopsis thaliana	ABA responsiveness
DlMYB114	ABRE	ACGTG	1572	5	+	Arabidopsis thaliana	ABA responsiveness
DlMYB115	ABRE	ACGTG	603	5	+	Arabidopsis thaliana	ABA responsiveness
DlMYB115	ABRE	GCAACGTGTC	709	9	+	Hordeum vulgare	ABA responsiveness
DlMYB115	ABRE	ACGTG	794	5	-	Arabidopsis thaliana	ABA responsiveness
DlMYB116	ABRE	GACACGTGGC	612	9	-	Triticum aestivum	ABA responsiveness
DlMYB116	ABRE	CACGTG	614	6	+	Arabidopsis thaliana	ABA responsiveness
DlMYB116	ABRE	ACGTG	615	5	+	Arabidopsis thaliana	ABA responsiveness
DlMYB116	ABRE	ACGTG	953	5	-	Arabidopsis thaliana	ABA responsiveness
DlMYB118	ABRE	ACGTG	219	5	+	Arabidopsis thaliana	ABA responsiveness
DlMYB118	ABRE	CACGTG	476	6	+	Arabidopsis thaliana	ABA responsiveness
DlMYB118	ABRE	ACGTG	477	5	+	Arabidopsis thaliana	ABA responsiveness
DlMYB119	ABRE	ACGTG	552	5	-	Arabidopsis thaliana	ABA responsiveness
DlMYB12	ABRE	ACGTG	879	5	+	Arabidopsis thaliana	ABA responsiveness
DlMYB13	ABRE	CACGTG	1188	6	-	Arabidopsis thaliana	ABA responsiveness
DlMYB13	ABRE	ACGTG	1189	5	+	Arabidopsis thaliana	ABA responsiveness
DlMYB14	ABRE	ACGTG	369	5	-	Arabidopsis thaliana	ABA responsiveness
DlMYB14	ABRE	CACGTG	439	6	+	Arabidopsis thaliana	ABA responsiveness
DlMYB14	ABRE	ACGTG	440	5	+	Arabidopsis thaliana	ABA responsiveness
DlMYB14	ABRE	ACGTG	1498	5	+	Arabidopsis thaliana	ABA responsiveness
DlMYB15	ABRE	ACGTG	369	5	-	Arabidopsis thaliana	ABA responsiveness
DlMYB15	ABRE	CACGTG	439	6	+	Arabidopsis thaliana	ABA responsiveness
DlMYB15	ABRE	ACGTG	440	5	+	Arabidopsis thaliana	ABA responsiveness
DlMYB15	ABRE	ACGTG	1498	5	+	Arabidopsis thaliana	ABA responsiveness
DlMYB16	ABRE	ACGTG	800	5	-	Arabidopsis thaliana	ABA responsiveness
DlMYB16	ABRE	TACGGTC	1306	7	-	Arabidopsis thaliana	ABA responsiveness
DlMYB17	ABRE	ACGTG	1302	5	+	Arabidopsis thaliana	ABA responsiveness
DlMYB17	ABRE	CGCACGTGTC	1716	9	-	Hordeum vulgare	ABA responsiveness
DlMYB17	ABRE	ACGTG	1718	5	-	Arabidopsis thaliana	ABA responsiveness
DlMYB18	ABRE	ACGTG	75	5	-	Arabidopsis thaliana	ABA responsiveness
DlMYB18	ABRE	ACGTG	593	5	-	Arabidopsis thaliana	ABA responsiveness
DlMYB19	ABRE	ACGTG	329	5	-	Arabidopsis thaliana	ABA responsiveness
DlMYB19	ABRE	ACGTG	736	5	-	Arabidopsis thaliana	ABA responsiveness
DlMYB19	ABRE	CACGTG	874	6	+	Arabidopsis thaliana	ABA responsiveness
DlMYB19	ABRE	ACGTG	875	5	+	Arabidopsis thaliana	ABA responsiveness
DlMYB19	ABRE	CACGTG	937	6	+	Arabidopsis thaliana	ABA responsiveness
DlMYB19	ABRE	ACGTG	938	5	+	Arabidopsis thaliana	ABA responsiveness
DlMYB19	ABRE	ACGTG	1022	5	-	Arabidopsis thaliana	ABA responsiveness
DlMYB19	ABRE	ACGTG	1035	5	-	Arabidopsis thaliana	ABA responsiveness
DlMYB19	ABRE	ACGTG	1069	5	+	Arabidopsis thaliana	ABA responsiveness
DlMYB20	ABRE	ACGTG	760	5	-	Arabidopsis thaliana	ABA responsiveness
DlMYB20	ABRE	CACGTG	781	6	+	Arabidopsis thaliana	ABA responsiveness
DlMYB20	ABRE	ACGTG	782	5	+	Arabidopsis thaliana	ABA responsiveness
DlMYB20	ABRE	CACGTG	896	6	+	Arabidopsis thaliana	ABA responsiveness
DlMYB20	ABRE	ACGTG	897	5	+	Arabidopsis thaliana	ABA responsiveness
DlMYB20	ABRE	CACGTG	965	6	+	Arabidopsis thaliana	ABA responsiveness
DlMYB20	ABRE	ACGTG	966	5	+	Arabidopsis thaliana	ABA responsiveness
DlMYB20	ABRE	ACGTG	1050	5	-	Arabidopsis thaliana	ABA responsiveness
DlMYB20	ABRE	ACGTG	1063	5	-	Arabidopsis thaliana	ABA responsiveness
DlMYB20	ABRE	ACGTG	1097	5	+	Arabidopsis thaliana	ABA responsiveness
DlMYB20	ABRE	ACGTG	1579	5	-	Arabidopsis thaliana	ABA responsiveness
DlMYB22	ABRE	TACGGTC	1746	7	+	Arabidopsis thaliana	ABA responsiveness
DlMYB22	ABRE	GACACGTGGC	1834	9	-	Triticum aestivum	ABA responsiveness
DlMYB22	ABRE	CACGTG	1836	6	-	Arabidopsis thaliana	ABA responsiveness
DlMYB22	ABRE	ACGTG	1837	5	+	Arabidopsis thaliana	ABA responsiveness
DlMYB23	ABRE	ACGTG	96	5	-	Arabidopsis thaliana	ABA responsiveness
DlMYB23	ABRE	CACGTG	1297	6	-	Arabidopsis thaliana	ABA responsiveness
DlMYB23	ABRE	ACGTG	1298	5	+	Arabidopsis thaliana	ABA responsiveness
DlMYB23	ABRE	ACGTG	1741	5	-	Arabidopsis thaliana	ABA responsiveness
DlMYB24	ABRE	ACGTG	1625	5	+	Arabidopsis thaliana	ABA responsiveness
DlMYB25	ABRE	ACGTG	1633	5	+	Arabidopsis thaliana	ABA responsiveness
DlMYB27	ABRE	ACGTG	84	5	+	Arabidopsis thaliana	ABA responsiveness
DlMYB27	ABRE	ACGTG	1395	5	+	Arabidopsis thaliana	ABA responsiveness
DlMYB28	ABRE	ACGTG	450	5	+	Arabidopsis thaliana	ABA responsiveness
DlMYB28	ABRE	CACGTG	1779	6	-	Arabidopsis thaliana	ABA responsiveness
DlMYB28	ABRE	ACGTG	1780	5	+	Arabidopsis thaliana	ABA responsiveness
DlMYB29	ABRE	ACGTG	620	5	+	Arabidopsis thaliana	ABA responsiveness
DlMYB29	ABRE	CACGTG	1779	6	-	Arabidopsis thaliana	ABA responsiveness
DlMYB29	ABRE	ACGTG	1780	5	+	Arabidopsis thaliana	ABA responsiveness
DlMYB3	ABRE	ACGTG	412	5	-	Arabidopsis thaliana	ABA responsiveness
DlMYB30	ABRE	CGCACGTGTC	994	9	-	Hordeum vulgare	ABA responsiveness
DlMYB30	ABRE	CACGTG	996	6	+	Arabidopsis thaliana	ABA responsiveness
DlMYB30	ABRE	ACGTG	997	5	+	Arabidopsis thaliana	ABA responsiveness
DlMYB30	ABRE	ACGTG	1748	5	-	Arabidopsis thaliana	ABA responsiveness
DlMYB30	ABRE	ACGTG	1805	5	-	Arabidopsis thaliana	ABA responsiveness
DlMYB31	ABRE	ACGTG	1395	5	+	Arabidopsis thaliana	ABA responsiveness
DlMYB31	ABRE	ACGTG	1553	5	-	Arabidopsis thaliana	ABA responsiveness
DlMYB31	ABRE	CACGTG	1665	6	-	Arabidopsis thaliana	ABA responsiveness
DlMYB31	ABRE	ACGTG	1666	5	+	Arabidopsis thaliana	ABA responsiveness
DlMYB32	ABRE	ACGTG	1249	5	-	Arabidopsis thaliana	ABA responsiveness
DlMYB32	ABRE	ACGTG	1644	5	+	Arabidopsis thaliana	ABA responsiveness
DlMYB33	ABRE	ACGTG	578	5	-	Arabidopsis thaliana	ABA responsiveness
DlMYB33	ABRE	ACGTG	825	5	+	Arabidopsis thaliana	ABA responsiveness
DlMYB33	ABRE	ACGTG	1551	5	-	Arabidopsis thaliana	ABA responsiveness
DlMYB34	ABRE	ACGTG	268	5	+	Arabidopsis thaliana	ABA responsiveness
DlMYB34	ABRE	ACGTG	1150	5	-	Arabidopsis thaliana	ABA responsiveness
DlMYB35	ABRE	ACGTG	503	5	-	Arabidopsis thaliana	ABA responsiveness
DlMYB35	ABRE	ACGTG	983	5	+	Arabidopsis thaliana	ABA responsiveness
DlMYB35	ABRE	ACGTG	1408	5	-	Arabidopsis thaliana	ABA responsiveness
DlMYB35	ABRE	ACGTG	1587	5	+	Arabidopsis thaliana	ABA responsiveness
DlMYB36	ABRE	ACGTG	108	5	+	Arabidopsis thaliana	ABA responsiveness
DlMYB36	ABRE	CACGTG	221	6	+	Arabidopsis thaliana	ABA responsiveness
DlMYB36	ABRE	ACGTG	222	5	+	Arabidopsis thaliana	ABA responsiveness
DlMYB36	ABRE	ACGTG	544	5	-	Arabidopsis thaliana	ABA responsiveness
DlMYB36	ABRE	ACGTG	1877	5	-	Arabidopsis thaliana	ABA responsiveness
DlMYB38	ABRE	CACGTG	80	6	+	Arabidopsis thaliana	ABA responsiveness
DlMYB38	ABRE	ACGTG	81	5	+	Arabidopsis thaliana	ABA responsiveness
DlMYB38	ABRE	CACGTG	573	6	+	Arabidopsis thaliana	ABA responsiveness
DlMYB38	ABRE	ACGTG	574	5	+	Arabidopsis thaliana	ABA responsiveness
DlMYB38	ABRE	ACGTG	1715	5	-	Arabidopsis thaliana	ABA responsiveness
DlMYB39	ABRE	CACGTG	490	6	+	Arabidopsis thaliana	ABA responsiveness
DlMYB39	ABRE	ACGTG	491	5	+	Arabidopsis thaliana	ABA responsiveness
DlMYB4	ABRE	TACGGTC	85	7	+	Arabidopsis thaliana	ABA responsiveness
DlMYB4	ABRE	CACGTG	425	6	+	Arabidopsis thaliana	ABA responsiveness
DlMYB4	ABRE	ACGTG	426	5	+	Arabidopsis thaliana	ABA responsiveness
DlMYB40	ABRE	ACGTG	1104	5	+	Arabidopsis thaliana	ABA responsiveness
DlMYB40	ABRE	ACGTG	1133	5	-	Arabidopsis thaliana	ABA responsiveness
DlMYB40	ABRE	ACGTG	1299	5	-	Arabidopsis thaliana	ABA responsiveness
DlMYB41	ABRE	ACGTG	830	5	+	Arabidopsis thaliana	ABA responsiveness
DlMYB42	ABRE	GACACGTGGC	1638	9	+	Triticum aestivum	ABA responsiveness
DlMYB43	ABRE	CGCACGTGTC	138	9	+	Hordeum vulgare	ABA responsiveness
DlMYB43	ABRE	ACGTG	140	5	-	Arabidopsis thaliana	ABA responsiveness
DlMYB43	ABRE	GACACGTGGC	567	9	+	Triticum aestivum	ABA responsiveness
DlMYB43	ABRE	CACGTG	569	6	+	Arabidopsis thaliana	ABA responsiveness
DlMYB43	ABRE	ACGTG	570	5	+	Arabidopsis thaliana	ABA responsiveness
DlMYB44	ABRE	ACGTG	539	5	+	Arabidopsis thaliana	ABA responsiveness
DlMYB45	ABRE	ACGTG	48	5	+	Arabidopsis thaliana	ABA responsiveness
DlMYB45	ABRE	ACGTG	247	5	-	Arabidopsis thaliana	ABA responsiveness
DlMYB45	ABRE	ACGTG	275	5	+	Arabidopsis thaliana	ABA responsiveness
DlMYB45	ABRE	CGTACGTGCA	1914	9	+	Hordeum vulgare	ABA responsiveness
DlMYB46	ABRE	ACGTG	52	5	+	Arabidopsis thaliana	ABA responsiveness
DlMYB46	ABRE	ACGTG	251	5	-	Arabidopsis thaliana	ABA responsiveness
DlMYB46	ABRE	ACGTG	279	5	+	Arabidopsis thaliana	ABA responsiveness
DlMYB47	ABRE	ACGTG	392	5	+	Arabidopsis thaliana	ABA responsiveness
DlMYB48	ABRE	ACGTG	453	5	+	Arabidopsis thaliana	ABA responsiveness
DlMYB49	ABRE	ACGTG	516	5	+	Arabidopsis thaliana	ABA responsiveness
DlMYB49	ABRE	ACGTG	595	5	+	Arabidopsis thaliana	ABA responsiveness
DlMYB49	ABRE	ACGTG	1378	5	-	Arabidopsis thaliana	ABA responsiveness
DlMYB49	ABRE	CACGTG	1437	6	-	Arabidopsis thaliana	ABA responsiveness
DlMYB49	ABRE	ACGTG	1438	5	+	Arabidopsis thaliana	ABA responsiveness
DlMYB49	ABRE	ACGTG	1771	5	-	Arabidopsis thaliana	ABA responsiveness
DlMYB5	ABRE	ACGTG	1214	5	+	Arabidopsis thaliana	ABA responsiveness
DlMYB5	ABRE	ACGTG	1446	5	+	Arabidopsis thaliana	ABA responsiveness
DlMYB50	ABRE	ACGTG	1858	5	-	Arabidopsis thaliana	ABA responsiveness
DlMYB51	ABRE	CACGTG	1056	6	-	Arabidopsis thaliana	ABA responsiveness
DlMYB51	ABRE	ACGTG	1057	5	+	Arabidopsis thaliana	ABA responsiveness
DlMYB51	ABRE	ACGTG	1542	5	-	Arabidopsis thaliana	ABA responsiveness
DlMYB52	ABRE	ACGTG	520	5	-	Arabidopsis thaliana	ABA responsiveness
DlMYB52	ABRE	ACGTG	1884	5	-	Arabidopsis thaliana	ABA responsiveness
DlMYB54	ABRE	ACGTG	877	5	+	Arabidopsis thaliana	ABA responsiveness
DlMYB54	ABRE	ACGTG	1907	5	-	Arabidopsis thaliana	ABA responsiveness
DlMYB55	ABRE	ACGTG	935	5	+	Arabidopsis thaliana	ABA responsiveness
DlMYB55	ABRE	ACGTG	957	5	+	Arabidopsis thaliana	ABA responsiveness
DlMYB55	ABRE	ACGTG	972	5	-	Arabidopsis thaliana	ABA responsiveness
DlMYB55	ABRE	ACGTG	1006	5	+	Arabidopsis thaliana	ABA responsiveness
DlMYB55	ABRE	ACGTG	1154	5	-	Arabidopsis thaliana	ABA responsiveness
DlMYB58	ABRE	ACGTG	276	5	-	Arabidopsis thaliana	ABA responsiveness
DlMYB59	ABRE	ACGTG	1271	5	-	Arabidopsis thaliana	ABA responsiveness
DlMYB59	ABRE	ACGTG	1560	5	-	Arabidopsis thaliana	ABA responsiveness
DlMYB6	ABRE	ACGTG	72	5	+	Arabidopsis thaliana	ABA responsiveness
DlMYB6	ABRE	ACGTG	172	5	-	Arabidopsis thaliana	ABA responsiveness
DlMYB6	ABRE	CACGTG	227	6	+	Arabidopsis thaliana	ABA responsiveness
DlMYB6	ABRE	ACGTG	228	5	+	Arabidopsis thaliana	ABA responsiveness
DlMYB6	ABRE	ACGTG	562	5	-	Arabidopsis thaliana	ABA responsiveness
DlMYB6	ABRE	ACGTG	624	5	-	Arabidopsis thaliana	ABA responsiveness
DlMYB6	ABRE	ACGTG	1330	5	-	Arabidopsis thaliana	ABA responsiveness
DlMYB60	ABRE	ACGTG	764	5	-	Arabidopsis thaliana	ABA responsiveness
DlMYB62	ABRE	ACGTG	1016	5	+	Arabidopsis thaliana	ABA responsiveness
DlMYB62	ABRE	GACACGTGGC	1103	9	-	Triticum aestivum	ABA responsiveness
DlMYB62	ABRE	CACGTG	1105	6	-	Arabidopsis thaliana	ABA responsiveness
DlMYB62	ABRE	ACGTG	1106	5	+	Arabidopsis thaliana	ABA responsiveness
DlMYB63	ABRE	ACGTG	436	5	-	Arabidopsis thaliana	ABA responsiveness
DlMYB63	ABRE	GCAACGTGTC	1124	9	+	Hordeum vulgare	ABA responsiveness
DlMYB63	ABRE	CACGTG	1126	6	-	Arabidopsis thaliana	ABA responsiveness
DlMYB63	ABRE	ACGTG	1127	5	+	Arabidopsis thaliana	ABA responsiveness
DlMYB64	ABRE	ACGTG	77	5	-	Arabidopsis thaliana	ABA responsiveness
DlMYB64	ABRE	ACGTG	1018	5	+	Arabidopsis thaliana	ABA responsiveness
DlMYB64	ABRE	GACACGTGGC	1105	9	-	Triticum aestivum	ABA responsiveness
DlMYB64	ABRE	CACGTG	1107	6	-	Arabidopsis thaliana	ABA responsiveness
DlMYB64	ABRE	ACGTG	1108	5	+	Arabidopsis thaliana	ABA responsiveness
DlMYB65	ABRE	ACGTG	436	5	-	Arabidopsis thaliana	ABA responsiveness
DlMYB65	ABRE	GCAACGTGTC	1124	9	+	Hordeum vulgare	ABA responsiveness
DlMYB65	ABRE	CACGTG	1126	6	-	Arabidopsis thaliana	ABA responsiveness
DlMYB65	ABRE	ACGTG	1127	5	+	Arabidopsis thaliana	ABA responsiveness
DlMYB66	ABRE	ACGTG	1420	5	-	Arabidopsis thaliana	ABA responsiveness
DlMYB67	ABRE	CACGTG	288	6	+	Arabidopsis thaliana	ABA responsiveness
DlMYB67	ABRE	ACGTG	289	5	+	Arabidopsis thaliana	ABA responsiveness
DlMYB67	ABRE	ACGTG	347	5	+	Arabidopsis thaliana	ABA responsiveness
DlMYB67	ABRE	CACGTG	374	6	+	Arabidopsis thaliana	ABA responsiveness
DlMYB67	ABRE	ACGTG	375	5	+	Arabidopsis thaliana	ABA responsiveness
DlMYB67	ABRE	ACGTG	447	5	-	Arabidopsis thaliana	ABA responsiveness
DlMYB67	ABRE	GACACGTGGC	1114	9	+	Triticum aestivum	ABA responsiveness
DlMYB67	ABRE	CACGTG	1116	6	-	Arabidopsis thaliana	ABA responsiveness
DlMYB67	ABRE	ACGTG	1117	5	+	Arabidopsis thaliana	ABA responsiveness
DlMYB67	ABRE	ACGTG	1439	5	-	Arabidopsis thaliana	ABA responsiveness
DlMYB67	ABRE	CGTACGTGCA	1649	9	-	Hordeum vulgare	ABA responsiveness
DlMYB67	ABRE	ACGTG	1651	5	-	Arabidopsis thaliana	ABA responsiveness
DlMYB67	ABRE	ACGTG	1683	5	+	Arabidopsis thaliana	ABA responsiveness
DlMYB67	ABRE	GCCGCGTGGC	1710	9	+	Oryza sativa	ABA responsiveness
DlMYB68	ABRE	CACGTG	705	6	+	Arabidopsis thaliana	ABA responsiveness
DlMYB68	ABRE	ACGTG	706	5	+	Arabidopsis thaliana	ABA responsiveness
DlMYB68	ABRE	ACGTG	743	5	+	Arabidopsis thaliana	ABA responsiveness
DlMYB68	ABRE	ACGTG	1257	5	+	Arabidopsis thaliana	ABA responsiveness
DlMYB68	ABRE	ACGTG	1406	5	-	Arabidopsis thaliana	ABA responsiveness
DlMYB68	ABRE	CGTACGTGCA	1414	9	+	Hordeum vulgare	ABA responsiveness
DlMYB68	ABRE	ACGTG	1474	5	+	Arabidopsis thaliana	ABA responsiveness
DlMYB69	ABRE	AACCCGG	979	7	+	Arabidopsis thaliana	ABA responsiveness
DlMYB7	ABRE	TACGGTC	134	7	+	Arabidopsis thaliana	ABA responsiveness
DlMYB7	ABRE	ACGTG	162	5	-	Arabidopsis thaliana	ABA responsiveness
DlMYB70	ABRE	ACGTG	172	5	-	Arabidopsis thaliana	ABA responsiveness
DlMYB71	ABRE	ACGTG	406	5	+	Arabidopsis thaliana	ABA responsiveness
DlMYB72	ABRE	ACGTG	45	5	-	Arabidopsis thaliana	ABA responsiveness
DlMYB72	ABRE	ACGTG	151	5	+	Arabidopsis thaliana	ABA responsiveness
DlMYB72	ABRE	ACGTG	763	5	+	Arabidopsis thaliana	ABA responsiveness
DlMYB73	ABRE	ACGTG	322	5	+	Arabidopsis thaliana	ABA responsiveness
DlMYB73	ABRE	ACGTG	1498	5	-	Arabidopsis thaliana	ABA responsiveness
DlMYB73	ABRE	ACGTG	1682	5	-	Arabidopsis thaliana	ABA responsiveness
DlMYB74	ABRE	CGCACGTGTC	1797	9	-	Hordeum vulgare	ABA responsiveness
DlMYB74	ABRE	CACGTG	1799	6	-	Arabidopsis thaliana	ABA responsiveness
DlMYB74	ABRE	ACGTG	1800	5	+	Arabidopsis thaliana	ABA responsiveness
DlMYB75	ABRE	ACGTG	403	5	-	Arabidopsis thaliana	ABA responsiveness
DlMYB75	ABRE	GCAACGTGTC	932	9	+	Hordeum vulgare	ABA responsiveness
DlMYB75	ABRE	ACGTG	935	5	+	Arabidopsis thaliana	ABA responsiveness
DlMYB76	ABRE	CACGTG	1790	6	-	Arabidopsis thaliana	ABA responsiveness
DlMYB76	ABRE	ACGTG	1791	5	+	Arabidopsis thaliana	ABA responsiveness
DlMYB77	ABRE	CACGTG	1543	6	-	Arabidopsis thaliana	ABA responsiveness
DlMYB77	ABRE	ACGTG	1544	5	+	Arabidopsis thaliana	ABA responsiveness
DlMYB78	ABRE	CACGTG	562	6	+	Arabidopsis thaliana	ABA responsiveness
DlMYB78	ABRE	ACGTG	563	5	+	Arabidopsis thaliana	ABA responsiveness
DlMYB78	ABRE	CACGTG	655	6	+	Arabidopsis thaliana	ABA responsiveness
DlMYB78	ABRE	ACGTG	656	5	+	Arabidopsis thaliana	ABA responsiveness
DlMYB79	ABRE	ACGTG	1222	5	-	Arabidopsis thaliana	ABA responsiveness
DlMYB79	ABRE	ACGTG	1601	5	+	Arabidopsis thaliana	ABA responsiveness
DlMYB8	ABRE	CACGTG	970	6	+	Arabidopsis thaliana	ABA responsiveness
DlMYB8	ABRE	ACGTG	971	5	+	Arabidopsis thaliana	ABA responsiveness
DlMYB80	ABRE	ACGTG	1894	5	+	Arabidopsis thaliana	ABA responsiveness
DlMYB81	ABRE	ACGTG	71	5	+	Arabidopsis thaliana	ABA responsiveness
DlMYB81	ABRE	ACGTG	176	5	+	Arabidopsis thaliana	ABA responsiveness
DlMYB81	ABRE	ACGTG	1476	5	-	Arabidopsis thaliana	ABA responsiveness
DlMYB81	ABRE	ACGTG	1532	5	+	Arabidopsis thaliana	ABA responsiveness
DlMYB81	ABRE	ACGTG	1835	5	-	Arabidopsis thaliana	ABA responsiveness
DlMYB81	ABRE	TACGGTC	1920	7	-	Arabidopsis thaliana	ABA responsiveness
DlMYB82	ABRE	CGCACGTGTC	327	9	+	Hordeum vulgare	ABA responsiveness
DlMYB82	ABRE	CACGTG	329	6	+	Arabidopsis thaliana	ABA responsiveness
DlMYB82	ABRE	ACGTG	330	5	+	Arabidopsis thaliana	ABA responsiveness
DlMYB82	ABRE	ACGTG	342	5	+	Arabidopsis thaliana	ABA responsiveness
DlMYB82	ABRE	CACGTG	606	6	+	Arabidopsis thaliana	ABA responsiveness
DlMYB82	ABRE	ACGTG	607	5	+	Arabidopsis thaliana	ABA responsiveness
DlMYB82	ABRE	ACGTG	1863	5	-	Arabidopsis thaliana	ABA responsiveness
DlMYB83	ABRE	ACGTG	1695	5	-	Arabidopsis thaliana	ABA responsiveness
DlMYB83	ABRE	ACGTG	1710	5	-	Arabidopsis thaliana	ABA responsiveness
DlMYB84	ABRE	ACGTG	1050	5	+	Arabidopsis thaliana	ABA responsiveness
DlMYB84	ABRE	ACGTG	1631	5	-	Arabidopsis thaliana	ABA responsiveness
DlMYB85	ABRE	ACGTG	1109	5	-	Arabidopsis thaliana	ABA responsiveness
DlMYB85	ABRE	GCAACGTGTC	1706	9	+	Hordeum vulgare	ABA responsiveness
DlMYB85	ABRE	CACGTG	1708	6	-	Arabidopsis thaliana	ABA responsiveness
DlMYB85	ABRE	ACGTG	1709	5	+	Arabidopsis thaliana	ABA responsiveness
DlMYB85	ABRE	ACGTG	1853	5	-	Arabidopsis thaliana	ABA responsiveness
DlMYB86	ABRE	TACGTGTC	897	8	+	Oryza sativa	ABA responsiveness
DlMYB86	ABRE	ACGTG	898	5	+	Arabidopsis thaliana	ABA responsiveness
DlMYB86	ABRE	ACGTG	966	5	+	Arabidopsis thaliana	ABA responsiveness
DlMYB86	ABRE	ACGTG	1219	5	+	Arabidopsis thaliana	ABA responsiveness
DlMYB86	ABRE	ACGTG	1598	5	-	Arabidopsis thaliana	ABA responsiveness
DlMYB86	ABRE	ACGTG	1775	5	-	Arabidopsis thaliana	ABA responsiveness
DlMYB87	ABRE	TACGTGTC	1054	8	+	Oryza sativa	ABA responsiveness
DlMYB87	ABRE	ACGTG	1055	5	+	Arabidopsis thaliana	ABA responsiveness
DlMYB87	ABRE	ACGTG	1650	5	+	Arabidopsis thaliana	ABA responsiveness
DlMYB87	ABRE	ACGTG	1814	5	+	Arabidopsis thaliana	ABA responsiveness
DlMYB87	ABRE	ACGTG	1908	5	-	Arabidopsis thaliana	ABA responsiveness
DlMYB89	ABRE	ACGTG	1711	5	-	Arabidopsis thaliana	ABA responsiveness
DlMYB9	ABRE	ACGTG	303	5	-	Arabidopsis thaliana	ABA responsiveness
DlMYB9	ABRE	ACGTG	739	5	-	Arabidopsis thaliana	ABA responsiveness
DlMYB9	ABRE	ACGTG	942	5	+	Arabidopsis thaliana	ABA responsiveness
DlMYB9	ABRE	CACGTG	1314	6	-	Arabidopsis thaliana	ABA responsiveness
DlMYB9	ABRE	ACGTG	1315	5	+	Arabidopsis thaliana	ABA responsiveness
DlMYB91	ABRE	GACACGTGGC	1825	9	+	Triticum aestivum	ABA responsiveness
DlMYB91	ABRE	CACGTG	1827	6	-	Arabidopsis thaliana	ABA responsiveness
DlMYB91	ABRE	ACGTG	1828	5	+	Arabidopsis thaliana	ABA responsiveness
DlMYB91	ABRE	ACGTG	1834	5	-	Arabidopsis thaliana	ABA responsiveness
DlMYB93	ABRE	ACGTG	1167	5	-	Arabidopsis thaliana	ABA responsiveness
DlMYB94	ABRE	ACGTG	1125	5	+	Arabidopsis thaliana	ABA responsiveness
DlMYB94	ABRE	CACGTG	1249	6	-	Arabidopsis thaliana	ABA responsiveness
DlMYB94	ABRE	ACGTG	1250	5	+	Arabidopsis thaliana	ABA responsiveness
DlMYB94	ABRE	ACGTG	1282	5	+	Arabidopsis thaliana	ABA responsiveness
DlMYB96	ABRE	ACGTG	621	5	+	Arabidopsis thaliana	ABA responsiveness
DlMYB96	ABRE	ACGTG	1049	5	+	Arabidopsis thaliana	ABA responsiveness
DlMYB96	ABRE	CGTACGTGCA	1164	9	-	Hordeum vulgare	ABA responsiveness
DlMYB96	ABRE	ACGTG	1166	5	-	Arabidopsis thaliana	ABA responsiveness
DlMYB96	ABRE	ACGTG	1243	5	-	Arabidopsis thaliana	ABA responsiveness
DlMYB97	ABRE	CACGTG	95	6	+	Arabidopsis thaliana	ABA responsiveness
DlMYB97	ABRE	ACGTG	96	5	+	Arabidopsis thaliana	ABA responsiveness
DlMYB97	ABRE	TACGTGTC	118	8	+	Oryza sativa	ABA responsiveness
DlMYB97	ABRE	ACGTG	119	5	+	Arabidopsis thaliana	ABA responsiveness
DlMYB103	circadian	CAAAGATATC	1095	9	-	Lycopersicon esculentum	circadian control
DlMYB104	circadian	CAAAGATATC	189	9	+	Lycopersicon esculentum	circadian control
DlMYB104	circadian	CAAAGATATC	1051	9	+	Lycopersicon esculentum	circadian control
DlMYB107	circadian	CAAAGATATC	1404	9	+	Lycopersicon esculentum	circadian control
DlMYB11	circadian	CAAAGATATC	901	9	-	Lycopersicon esculentum	circadian control
DlMYB116	circadian	CAAAGATATC	1906	9	-	Lycopersicon esculentum	circadian control
DlMYB12	circadian	CAAAGATATC	1493	9	+	Lycopersicon esculentum	circadian control
DlMYB26	circadian	CAAAGATATC	53	9	+	Lycopersicon esculentum	circadian control
DlMYB32	circadian	CAAAGATATC	1320	9	-	Lycopersicon esculentum	circadian control
DlMYB33	circadian	CAAAGATATC	1221	9	+	Lycopersicon esculentum	circadian control
DlMYB42	circadian	CAAAGATATC	1570	9	-	Lycopersicon esculentum	circadian control
DlMYB51	circadian	CAAAGATATC	158	9	-	Lycopersicon esculentum	circadian control
DlMYB53	circadian	CAAAGATATC	708	9	+	Lycopersicon esculentum	circadian control
DlMYB53	circadian	CAAAGATATC	1769	9	+	Lycopersicon esculentum	circadian control
DlMYB58	circadian	CAAAGATATC	479	9	-	Lycopersicon esculentum	circadian control
DlMYB61	circadian	CAAAGATATC	265	9	+	Lycopersicon esculentum	circadian control
DlMYB61	circadian	CAAAGATATC	269	9	-	Lycopersicon esculentum	circadian control
DlMYB62	circadian	CAAAGATATC	305	9	+	Lycopersicon esculentum	circadian control
DlMYB72	circadian	CAAAGATATC	1080	9	-	Lycopersicon esculentum	circadian control
DlMYB76	circadian	CAAAGATATC	422	9	-	Lycopersicon esculentum	circadian control
DlMYB80	circadian	CAAAGATATC	268	9	-	Lycopersicon esculentum	circadian control
DlMYB82	circadian	CAAAGATATC	131	9	+	Lycopersicon esculentum	circadian control
DlMYB82	circadian	CAAAGATATC	135	9	-	Lycopersicon esculentum	circadian control
DlMYB84	circadian	CAAAGATATC	1673	9	+	Lycopersicon esculentum	circadian control
DlMYB87	circadian	CAAAGATATC	1484	9	+	Lycopersicon esculentum	circadian control
DlMYB90	circadian	CAAAGATATC	1296	9	+	Lycopersicon esculentum	circadian control
DlMYB95	circadian	CAAAGATATC	1302	9	+	Lycopersicon esculentum	circadian control
DlMYB10	ACE	CTAACGTATT	1002	9	-	Petroselinum crispum	light responsive
DlMYB17	ACE	CTAACGTATT	974	9	+	Petroselinum crispum	light responsive
DlMYB17	ACE	GACACGTATG	1382	9	-	Petroselinum crispum	light responsive
DlMYB17	ACE	GACACGTATG	1716	9	+	Petroselinum crispum	light responsive
DlMYB30	ACE	CTAACGTATT	349	9	+	Petroselinum crispum	light responsive
DlMYB35	ACE	GACACGTATG	501	9	+	Petroselinum crispum	light responsive
DlMYB38	ACE	CTAACGTATT	634	9	+	Petroselinum crispum	light responsive
DlMYB39	ACE	CTAACGTATT	74	9	+	Petroselinum crispum	light responsive
DlMYB45	ACE	CTAACGTATT	1759	9	+	Petroselinum crispum	light responsive
DlMYB46	ACE	CTAACGTATT	1759	9	+	Petroselinum crispum	light responsive
DlMYB47	ACE	CTAACGTATT	1634	9	-	Petroselinum crispum	light responsive
DlMYB49	ACE	GCGACGTACC	592	9	-	Petroselinum crispum	light responsive
DlMYB49	ACE	CTAACGTATT	1179	9	+	Petroselinum crispum	light responsive
DlMYB6	ACE	GACACGTATG	1814	9	+	Petroselinum crispum	light responsive
DlMYB101	ACE	CTAACGTATT	1296	9	+	Petroselinum crispum	light responsive
DlMYB104	ACE	CTAACGTATT	1344	9	+	Petroselinum crispum	light responsive
DlMYB63	ACE	GCGACGTACC	427	9	+	Petroselinum crispum	light responsive
DlMYB65	ACE	GCGACGTACC	427	9	+	Petroselinum crispum	light responsive
DlMYB72	ACE	CTAACGTATT	864	9	-	Petroselinum crispum	light responsive
DlMYB74	ACE	GACACGTATG	840	9	-	Petroselinum crispum	light responsive
DlMYB75	ACE	CTAACGTATT	616	9	-	Petroselinum crispum	light responsive
DlMYB78	ACE	CTAACGTATT	1569	10	-	Petroselinum crispum	light responsive
DlMYB83	ACE	GACACGTATG	534	9	+	Petroselinum crispum	light responsive
DlMYB83	ACE	CTAACGTATT	1582	9	-	Petroselinum crispum	light responsive
DlMYB87	ACE	GACACGTATG	1052	9	-	Petroselinum crispum	light responsive
DlMYB89	ACE	CTAACGTATT	1815	9	-	Petroselinum crispum	light responsive
DlMYB106	ACE	GACACGTATG	515	9	+	Petroselinum crispum	light responsive
DlMYB110	ACE	CTAACGTATT	487	9	+	Petroselinum crispum	light responsive
DlMYB113	ACE	CTAACGTATT	1216	9	-	Petroselinum crispum	light responsive
DlMYB115	ACE	CTAACGTATT	1348	9	-	Petroselinum crispum	light responsive
DlMYB117	ACE	CTAACGTATT	650	9	-	Petroselinum crispum	light responsive
DlMYB1	G-Box	CACGTG	498	6	+	Pisum sativum	light responsive
DlMYB1	G-Box	CACGTG	1599	6	-	Pisum sativum	light responsive
DlMYB1	G-box	CACGTG	498	6	+	Arabidopsis thaliana	light responsive
DlMYB1	G-box	TACGTG	1394	6	+	Arabidopsis thaliana	light responsive
DlMYB1	G-box	CACGTG	1599	6	-	Arabidopsis thaliana	light responsive
DlMYB10	G-box	TACGTG	19	6	-	Arabidopsis thaliana	light responsive
DlMYB10	G-box	CAGACGTGGCA	1536	10	+	Nicotiana plumbaginifolia	light responsive
DlMYB10	G-box	CACGTC	1766	6	+	Zea mays	light responsive
DlMYB10	G-Box	CACGTT	1538	6	-	Pisum sativum	light responsive
DlMYB11	G-box	CACGAC	1811	6	-	Zea mays	light responsive
DlMYB12	G-Box	CACGTT	878	6	-	Pisum sativum	light responsive
DlMYB13	G-box	CACGTG	1188	6	-	Arabidopsis thaliana	light responsive
DlMYB13	G-Box	CACGTG	1188	6	-	Pisum sativum	light responsive
DlMYB14	G-Box	CACGTG	439	6	+	Pisum sativum	light responsive
DlMYB14	G-box	CACGTC	369	6	+	Zea mays	light responsive
DlMYB14	G-box	CACGTG	439	6	+	Arabidopsis thaliana	light responsive
DlMYB14	G-box	TACGTG	1497	6	+	Arabidopsis thaliana	light responsive
DlMYB15	G-box	CACGTC	369	6	+	Zea mays	light responsive
DlMYB15	G-box	CACGTG	439	6	+	Arabidopsis thaliana	light responsive
DlMYB15	G-box	TACGTG	1497	6	+	Arabidopsis thaliana	light responsive
DlMYB15	G-Box	CACGTG	439	6	+	Pisum sativum	light responsive
DlMYB16	G-box	TAACACGTAG	797	9	+	Brassica oleracea	light responsive
DlMYB16	G-box	TACGTG	800	6	-	Arabidopsis thaliana	light responsive
DlMYB17	G-box	CACGTC	1301	6	-	Zea mays	light responsive
DlMYB17	G-box	TACGTG	1718	6	-	Arabidopsis thaliana	light responsive
DlMYB18	G-box	TACGTG	75	6	-	Arabidopsis thaliana	light responsive
DlMYB18	G-box	TACGTG	593	6	-	Arabidopsis thaliana	light responsive
DlMYB19	G-Box	CACGTT	736	6	+	Pisum sativum	light responsive
DlMYB19	G-Box	CACGTG	874	6	+	Pisum sativum	light responsive
DlMYB19	G-Box	CACGTG	937	6	+	Pisum sativum	light responsive
DlMYB19	G-box	CCACGTAA	328	8	+	Brassica napus	light responsive
DlMYB19	G-box	TACGTG	329	6	-	Arabidopsis thaliana	light responsive
DlMYB19	G-box	CACGTG	874	6	+	Arabidopsis thaliana	light responsive
DlMYB19	G-box	CACGTG	937	6	+	Arabidopsis thaliana	light responsive
DlMYB19	G-box	TACGTG	1022	6	-	Arabidopsis thaliana	light responsive
DlMYB19	G-box	CACGTC	1035	6	+	Zea mays	light responsive
DlMYB19	G-box	CCACGTAA	1067	8	-	Brassica napus	light responsive
DlMYB19	G-box	TACGTG	1068	6	+	Arabidopsis thaliana	light responsive
DlMYB20	G-Box	CACGTT	760	6	+	Pisum sativum	light responsive
DlMYB20	G-Box	CACGTG	781	6	+	Pisum sativum	light responsive
DlMYB20	G-Box	CACGTG	896	6	+	Pisum sativum	light responsive
DlMYB20	G-Box	CACGTG	965	6	+	Pisum sativum	light responsive
DlMYB20	G-Box	CACGTT	1579	6	+	Pisum sativum	light responsive
DlMYB20	G-box	CACGTG	781	6	+	Arabidopsis thaliana	light responsive
DlMYB20	G-box	CACGTG	896	6	+	Arabidopsis thaliana	light responsive
DlMYB20	G-box	CACGTG	965	6	+	Arabidopsis thaliana	light responsive
DlMYB20	G-box	TACGTG	1050	6	-	Arabidopsis thaliana	light responsive
DlMYB20	G-box	CACGTC	1063	6	+	Zea mays	light responsive
DlMYB20	G-box	CCACGTAA	1095	8	-	Brassica napus	light responsive
DlMYB20	G-box	TACGTG	1096	6	+	Arabidopsis thaliana	light responsive
DlMYB22	G-Box	CACGTG	1836	6	-	Pisum sativum	light responsive
DlMYB22	G-box	CACGTG	1836	6	-	Arabidopsis thaliana	light responsive
DlMYB23	G-Box	CACGTT	96	6	+	Pisum sativum	light responsive
DlMYB23	G-Box	CACGTG	1297	6	-	Pisum sativum	light responsive
DlMYB23	G-box	CACGAC	579	6	-	Zea mays	light responsive
DlMYB23	G-box	CACGTG	1297	6	-	Arabidopsis thaliana	light responsive
DlMYB23	G-box	TACGTG	1741	6	-	Arabidopsis thaliana	light responsive
DlMYB24	G-box	TACGTG	1624	6	+	Arabidopsis thaliana	light responsive
DlMYB25	G-box	TACGTG	1632	6	+	Arabidopsis thaliana	light responsive
DlMYB26	G-box	CACGAC	709	6	-	Zea mays	light responsive
DlMYB27	G-Box	CACGTT	1394	6	-	Pisum sativum	light responsive
DlMYB27	G-box	TACGTG	83	6	+	Arabidopsis thaliana	light responsive
DlMYB27	G-box	TAACACGTAG	665	9	-	Brassica oleracea	light responsive
DlMYB28	G-Box	CACGTG	1779	6	-	Pisum sativum	light responsive
DlMYB28	G-box	CACGTC	449	6	-	Zea mays	light responsive
DlMYB28	G-box	CACGTG	1779	6	-	Arabidopsis thaliana	light responsive
DlMYB29	G-Box	CACGTG	1779	6	-	Pisum sativum	light responsive
DlMYB29	G-box	CACGTC	619	6	-	Zea mays	light responsive
DlMYB29	G-box	CACGTG	1779	6	-	Arabidopsis thaliana	light responsive
DlMYB3	G-Box	CACGTT	412	6	+	Pisum sativum	light responsive
DlMYB30	G-Box	CACGTG	996	6	+	Pisum sativum	light responsive
DlMYB30	G-box	tgACACGTGGCA	993	11	+	Lycopersicon esculentum	light responsive
DlMYB30	G-box	ACACGTG(G/t)CACC	995	11	+	Lycopersicon esculentum	light responsive
DlMYB30	G-box	CACGTG	996	6	+	Arabidopsis thaliana	light responsive
DlMYB30	G-box	CACGAC	1715	6	+	Zea mays	light responsive
DlMYB30	G-box	CACGAC	1727	6	-	Zea mays	light responsive
DlMYB30	G-box	TACGTG	1748	6	-	Arabidopsis thaliana	light responsive
DlMYB30	G-box	CACGTC	1805	6	+	Zea mays	light responsive
DlMYB31	G-Box	CACGTT	1394	6	-	Pisum sativum	light responsive
DlMYB31	G-Box	CACGTG	1665	6	-	Pisum sativum	light responsive
DlMYB31	G-box	TACGTG	1553	6	-	Arabidopsis thaliana	light responsive
DlMYB31	G-box	TAACACGTAG	1664	9	-	Brassica oleracea	light responsive
DlMYB31	G-box	CACGTG	1665	6	-	Arabidopsis thaliana	light responsive
DlMYB32	G-Box	CACGTT	1249	6	+	Pisum sativum	light responsive
DlMYB32	G-Box	CACGTT	1643	6	-	Pisum sativum	light responsive
DlMYB32	G-box	CACGAC	1692	6	+	Zea mays	light responsive
DlMYB33	G-box	CACGAC	121	6	-	Zea mays	light responsive
DlMYB33	G-box	TAACACGTAG	823	9	-	Brassica oleracea	light responsive
DlMYB33	G-box	TACGTG	824	6	+	Arabidopsis thaliana	light responsive
DlMYB33	G-box	TACGTG	1551	6	-	Arabidopsis thaliana	light responsive
DlMYB33	G-Box	CACGTT	578	6	+	Pisum sativum	light responsive
DlMYB34	G-Box	CACGTT	267	6	-	Pisum sativum	light responsive
DlMYB34	G-box	CCACGTAA	1149	8	+	Brassica napus	light responsive
DlMYB34	G-box	TACGTG	1150	6	-	Arabidopsis thaliana	light responsive
DlMYB35	G-Box	CACGTT	1408	6	+	Pisum sativum	light responsive
DlMYB35	G-box	TAACACGTAG	500	9	+	Brassica oleracea	light responsive
DlMYB35	G-box	TACGTG	503	6	-	Arabidopsis thaliana	light responsive
DlMYB35	G-box	TACGTG	982	6	+	Arabidopsis thaliana	light responsive
DlMYB35	G-box	TACGTG	1586	6	+	Arabidopsis thaliana	light responsive
DlMYB36	G-Box	CACGTT	107	6	-	Pisum sativum	light responsive
DlMYB36	G-Box	CACGTG	221	6	+	Pisum sativum	light responsive
DlMYB36	G-box	CACGTG	221	6	+	Arabidopsis thaliana	light responsive
DlMYB36	G-box	CCACGTAA	543	8	+	Brassica napus	light responsive
DlMYB36	G-box	TACGTG	544	6	-	Arabidopsis thaliana	light responsive
DlMYB36	G-box	TACGTG	1877	6	-	Arabidopsis thaliana	light responsive
DlMYB38	G-box	CACGTG	80	6	+	Arabidopsis thaliana	light responsive
DlMYB38	G-box	GCCACGTGGA	571	9	+	Arabidopsis thaliana	light responsive
DlMYB38	G-box	CACGTG	573	6	+	Arabidopsis thaliana	light responsive
DlMYB38	G-box	CACGTC	1715	6	+	Zea mays	light responsive
DlMYB38	G-Box	CACGTG	80	6	+	Pisum sativum	light responsive
DlMYB38	G-Box	CACGTG	573	6	+	Pisum sativum	light responsive
DlMYB39	G-box	CACGTG	490	6	+	Arabidopsis thaliana	light responsive
DlMYB39	G-Box	CACGTG	490	6	+	Pisum sativum	light responsive
DlMYB4	G-Box	CACGTGAAA	422	9	-	Pisum sativum	light responsive
DlMYB4	G-Box	CACGTG	425	6	+	Pisum sativum	light responsive
DlMYB4	G-box	CACGTG	425	6	+	Arabidopsis thaliana	light responsive
DlMYB40	G-box	TACGTG	1103	6	+	Arabidopsis thaliana	light responsive
DlMYB40	G-box	TAAACGTG	1133	8	-	Brassica oleracea	light responsive
DlMYB40	G-Box	CACGTT	1133	6	+	Pisum sativum	light responsive
DlMYB40	G-Box	CACGTT	1299	6	+	Pisum sativum	light responsive
DlMYB41	G-box	CACGAC	1333	6	-	Zea mays	light responsive
DlMYB41	G-Box	CACGTT	829	6	-	Pisum sativum	light responsive
DlMYB43	G-box	TACGTG	140	6	-	Arabidopsis thaliana	light responsive
DlMYB43	G-box	GCCACGTGGA	153	9	-	Arabidopsis thaliana	light responsive
DlMYB43	G-box	ACACGTGT	568	8	+	Brassica napus	light responsive
DlMYB43	G-box	CACGTG	569	6	+	Arabidopsis thaliana	light responsive
DlMYB43	G-Box	CACGTG	569	6	+	Pisum sativum	light responsive
DlMYB44	G-box	TAACACGTAG	537	9	-	Brassica oleracea	light responsive
DlMYB44	G-box	TACGTG	538	6	+	Arabidopsis thaliana	light responsive
DlMYB45	G-box	TACGTG	47	6	+	Arabidopsis thaliana	light responsive
DlMYB45	G-box	TAACACGTAG	244	9	+	Brassica oleracea	light responsive
DlMYB45	G-box	TAAACGTG	272	8	+	Brassica oleracea	light responsive
DlMYB45	G-Box	CACGTT	247	6	+	Pisum sativum	light responsive
DlMYB45	G-Box	CACGTT	274	6	-	Pisum sativum	light responsive
DlMYB46	G-box	TACGTG	51	6	+	Arabidopsis thaliana	light responsive
DlMYB46	G-box	TAACACGTAG	248	9	+	Brassica oleracea	light responsive
DlMYB46	G-box	TAAACGTG	276	8	+	Brassica oleracea	light responsive
DlMYB46	G-Box	CACGTT	251	6	+	Pisum sativum	light responsive
DlMYB46	G-Box	CACGTT	278	6	-	Pisum sativum	light responsive
DlMYB47	G-box	TACGTG	391	6	+	Arabidopsis thaliana	light responsive
DlMYB48	G-box	CCACGTAA	451	8	-	Brassica napus	light responsive
DlMYB48	G-box	TACGTG	452	6	+	Arabidopsis thaliana	light responsive
DlMYB49	G-Box	CACGTT	515	6	-	Pisum sativum	light responsive
DlMYB49	G-Box	CACGTT	1378	6	+	Pisum sativum	light responsive
DlMYB49	G-Box	CACGTG	1437	6	-	Pisum sativum	light responsive
DlMYB49	G-box	TACGTG	594	6	+	Arabidopsis thaliana	light responsive
DlMYB49	G-box	CACGTG	1437	6	-	Arabidopsis thaliana	light responsive
DlMYB49	G-box	CACGAC	1649	6	-	Zea mays	light responsive
DlMYB49	G-box	CACGTC	1771	6	+	Zea mays	light responsive
DlMYB5	G-box	CACGTC	1213	6	-	Zea mays	light responsive
DlMYB5	G-Box	CACGTT	1445	6	-	Pisum sativum	light responsive
DlMYB50	G-Box	CACGTT	1858	6	+	Pisum sativum	light responsive
DlMYB6	G-Box	CACGTT	71	6	-	Pisum sativum	light responsive
DlMYB6	G-Box	CACGTT	172	6	+	Pisum sativum	light responsive
DlMYB6	G-Box	CACGTG	227	6	+	Pisum sativum	light responsive
DlMYB6	G-Box	CACGTT	562	6	+	Pisum sativum	light responsive
DlMYB6	G-box	ACACGTGT	226	8	+	Brassica napus	light responsive
DlMYB6	G-box	CACGTG	227	6	+	Arabidopsis thaliana	light responsive
DlMYB6	G-box	TACGTG	624	6	-	Arabidopsis thaliana	light responsive
DlMYB6	G-box	TACGTG	1330	6	-	Arabidopsis thaliana	light responsive
DlMYB7	G-Box	CACGTT	162	6	+	Pisum sativum	light responsive
DlMYB8	G-box	ACACGTGT	969	8	+	Brassica napus	light responsive
DlMYB8	G-box	CACGTG	970	6	+	Arabidopsis thaliana	light responsive
DlMYB8	G-Box	CACGTG	970	6	+	Pisum sativum	light responsive
DlMYB9	G-box	TACGTG	303	6	-	Arabidopsis thaliana	light responsive
DlMYB9	G-box	CACGTC	941	6	-	Zea mays	light responsive
DlMYB9	G-box	CACGTG	1314	6	-	Arabidopsis thaliana	light responsive
DlMYB9	G-box	CACGAC	1456	6	+	Zea mays	light responsive
DlMYB9	G-Box	CACGTT	739	6	+	Pisum sativum	light responsive
DlMYB9	G-Box	CACGTG	1314	6	-	Pisum sativum	light responsive
DlMYB100	G-Box	CACGTT	1174	6	+	Pisum sativum	light responsive
DlMYB101	G-box	CACGTG	1364	6	-	Arabidopsis thaliana	light responsive
DlMYB101	G-box	TACGTG	1859	6	-	Arabidopsis thaliana	light responsive
DlMYB101	G-Box	CACGTT	68	6	+	Pisum sativum	light responsive
DlMYB101	G-Box	CACGTG	1364	6	-	Pisum sativum	light responsive
DlMYB101	G-Box	CACGTT	1818	6	-	Pisum sativum	light responsive
DlMYB102	G-box	ACACGTGT	1140	8	-	Brassica napus	light responsive
DlMYB102	G-box	CACGTG	1141	6	-	Arabidopsis thaliana	light responsive
DlMYB102	G-Box	CACGTG	1141	6	-	Pisum sativum	light responsive
DlMYB103	G-Box	CACGTT	1537	6	-	Pisum sativum	light responsive
DlMYB104	G-Box	CACGTG	998	6	+	Pisum sativum	light responsive
DlMYB104	G-box	ACACGTGT	997	8	+	Brassica napus	light responsive
DlMYB104	G-box	CACGTG	998	6	+	Arabidopsis thaliana	light responsive
DlMYB104	G-box	TACGTG	1346	6	-	Arabidopsis thaliana	light responsive
DlMYB104	G-box	CACGAC	1835	6	-	Zea mays	light responsive
DlMYB51	G-Box	CACGTG	1056	6	-	Pisum sativum	light responsive
DlMYB51	G-Box	CACGTT	1542	6	+	Pisum sativum	light responsive
DlMYB51	G-box	ACACGTGT	1055	8	-	Brassica napus	light responsive
DlMYB51	G-box	CACGTG	1056	6	-	Arabidopsis thaliana	light responsive
DlMYB52	G-box	CACGTC	520	6	+	Zea mays	light responsive
DlMYB52	G-box	CACGTC	1884	6	+	Zea mays	light responsive
DlMYB54	G-box	CACGTC	876	6	-	Zea mays	light responsive
DlMYB54	G-box	TACGTG	1907	6	-	Arabidopsis thaliana	light responsive
DlMYB55	G-Box	CACGTT	1154	6	+	Pisum sativum	light responsive
DlMYB55	G-box	TACGTG	934	6	+	Arabidopsis thaliana	light responsive
DlMYB55	G-box	TACGTG	956	6	+	Arabidopsis thaliana	light responsive
DlMYB55	G-box	TACGTG	972	6	-	Arabidopsis thaliana	light responsive
DlMYB55	G-box	TACGTG	1005	6	+	Arabidopsis thaliana	light responsive
DlMYB57	G-box	ACACGTG(G/t)CACC	1878	10.5	+	Lycopersicon esculentum	light responsive
DlMYB58	G-Box	CACGTT	276	6	+	Pisum sativum	light responsive
DlMYB59	G-Box	CACGTT	1271	6	+	Pisum sativum	light responsive
DlMYB59	G-box	CACGAC	923	6	+	Zea mays	light responsive
DlMYB59	G-box	CACGTC	1560	6	+	Zea mays	light responsive
DlMYB60	G-Box	TCCACATGGCA	103	10	-	Triticum aestivum	light responsive
DlMYB60	G-Box	CACGTT	764	6	+	Pisum sativum	light responsive
DlMYB62	G-box	tgACACGTGGCA	1102	11	-	Lycopersicon esculentum	light responsive
DlMYB62	G-box	ACACGTGGC	1103	9	-	Brassica napus	light responsive
DlMYB62	G-box	TAACACGTAG	1104	9	-	Brassica oleracea	light responsive
DlMYB62	G-box	CACGTG	1105	6	-	Arabidopsis thaliana	light responsive
DlMYB62	G-Box	CACGTT	1015	6	-	Pisum sativum	light responsive
DlMYB62	G-Box	CACGTG	1105	6	-	Pisum sativum	light responsive
DlMYB63	G-box	TACGTG	436	6	-	Arabidopsis thaliana	light responsive
DlMYB63	G-box	ACACGTGGC	1124	9	-	Brassica napus	light responsive
DlMYB63	G-box	CACGTG	1126	6	-	Arabidopsis thaliana	light responsive
DlMYB63	G-Box	CACGTG	1126	6	-	Pisum sativum	light responsive
DlMYB64	G-Box	CACGTT	1017	6	-	Pisum sativum	light responsive
DlMYB64	G-Box	CACGTG	1107	6	-	Pisum sativum	light responsive
DlMYB64	G-box	TACGTG	77	6	-	Arabidopsis thaliana	light responsive
DlMYB64	G-box	tgACACGTGGCA	1104	11	-	Lycopersicon esculentum	light responsive
DlMYB64	G-box	ACACGTGGC	1105	9	-	Brassica napus	light responsive
DlMYB64	G-box	TAACACGTAG	1106	9	-	Brassica oleracea	light responsive
DlMYB64	G-box	CACGTG	1107	6	-	Arabidopsis thaliana	light responsive
DlMYB65	G-box	TACGTG	436	6	-	Arabidopsis thaliana	light responsive
DlMYB65	G-box	ACACGTGGC	1124	9	-	Brassica napus	light responsive
DlMYB65	G-box	CACGTG	1126	6	-	Arabidopsis thaliana	light responsive
DlMYB65	G-Box	CACGTG	1126	6	-	Pisum sativum	light responsive
DlMYB66	G-Box	CACGTT	1420	6	+	Pisum sativum	light responsive
DlMYB67	G-Box	CACGTG	288	6	+	Pisum sativum	light responsive
DlMYB67	G-Box	CACGTG	374	6	+	Pisum sativum	light responsive
DlMYB67	G-Box	CACGTT	447	6	+	Pisum sativum	light responsive
DlMYB67	G-Box	CACGTG	1116	6	-	Pisum sativum	light responsive
DlMYB67	G-Box	CACGTT	1439	6	+	Pisum sativum	light responsive
DlMYB67	G-box	CACGTG	288	6	+	Arabidopsis thaliana	light responsive
DlMYB67	G-box	TACGTG	346	6	+	Arabidopsis thaliana	light responsive
DlMYB67	G-box	CACGTG	374	6	+	Arabidopsis thaliana	light responsive
DlMYB67	G-box	tgACACGTGGCA	1113	11	+	Lycopersicon esculentum	light responsive
DlMYB67	G-box	CACGTG	1116	6	-	Arabidopsis thaliana	light responsive
DlMYB67	G-box	TACGTG	1651	6	-	Arabidopsis thaliana	light responsive
DlMYB67	G-box	TACGTG	1682	6	+	Arabidopsis thaliana	light responsive
DlMYB68	G-box	CACGTG	705	6	+	Arabidopsis thaliana	light responsive
DlMYB68	G-box	TACGTG	742	6	+	Arabidopsis thaliana	light responsive
DlMYB68	G-box	CACGTC	1256	6	-	Zea mays	light responsive
DlMYB68	G-box	TACGTG	1406	6	-	Arabidopsis thaliana	light responsive
DlMYB68	G-Box	CACGTG	705	6	+	Pisum sativum	light responsive
DlMYB68	G-Box	CACGTT	1473	6	-	Pisum sativum	light responsive
DlMYB69	G-box	CACGAC	1831	6	-	Zea mays	light responsive
DlMYB69	G-Box	TCCACATGGCA	1113	10	+	Triticum aestivum	light responsive
DlMYB70	G-Box	CACGTT	172	6	+	Pisum sativum	light responsive
DlMYB71	G-Box	CACGTT	405	6	-	Pisum sativum	light responsive
DlMYB72	G-Box	CACGTT	762	6	-	Pisum sativum	light responsive
DlMYB72	G-box	CACGTC	45	6	+	Zea mays	light responsive
DlMYB72	G-box	CACGTC	150	6	-	Zea mays	light responsive
DlMYB73	G-Box	CACGTT	1682	6	+	Pisum sativum	light responsive
DlMYB73	G-box	TACGTG	321	6	+	Arabidopsis thaliana	light responsive
DlMYB73	G-box	TACGTG	1498	6	-	Arabidopsis thaliana	light responsive
DlMYB74	G-box	CACGTG	1799	6	-	Arabidopsis thaliana	light responsive
DlMYB74	G-Box	CACGTG	1799	6	-	Pisum sativum	light responsive
DlMYB75	G-Box	CACGTT	934	6	-	Pisum sativum	light responsive
DlMYB75	G-box	TACGTG	403	6	-	Arabidopsis thaliana	light responsive
DlMYB76	G-Box	CACGTG	1790	6	-	Pisum sativum	light responsive
DlMYB76	G-box	CACGAC	1096	6	+	Zea mays	light responsive
DlMYB76	G-box	ACACGTGT	1789	8	-	Brassica napus	light responsive
DlMYB76	G-box	CACGTG	1790	6	-	Arabidopsis thaliana	light responsive
DlMYB77	G-box	ACACGTGT	1542	8	-	Brassica napus	light responsive
DlMYB77	G-box	CACGTG	1543	6	-	Arabidopsis thaliana	light responsive
DlMYB77	G-Box	CACGTG	1543	6	-	Pisum sativum	light responsive
DlMYB78	G-box	CACGTG	562	6	+	Arabidopsis thaliana	light responsive
DlMYB78	G-box	CACGTG	655	6	+	Arabidopsis thaliana	light responsive
DlMYB78	G-Box	CACGTG	562	6	+	Pisum sativum	light responsive
DlMYB78	G-Box	CACGTG	655	6	+	Pisum sativum	light responsive
DlMYB79	G-box	TACGTG	1222	6	-	Arabidopsis thaliana	light responsive
DlMYB79	G-box	TACGTG	1600	6	+	Arabidopsis thaliana	light responsive
DlMYB80	G-box	CCACGTAA	1892	8	-	Brassica napus	light responsive
DlMYB80	G-box	TACGTG	1893	6	+	Arabidopsis thaliana	light responsive
DlMYB81	G-Box	CACGTT	70	6	-	Pisum sativum	light responsive
DlMYB81	G-Box	CACGTT	1835	6	+	Pisum sativum	light responsive
DlMYB81	G-box	CACGTC	175	6	-	Zea mays	light responsive
DlMYB81	G-box	TACGTG	1476	6	-	Arabidopsis thaliana	light responsive
DlMYB81	G-box	TACGTG	1531	6	+	Arabidopsis thaliana	light responsive
DlMYB82	G-Box	CACGTG	329	6	+	Pisum sativum	light responsive
DlMYB82	G-Box	CACGTG	606	6	+	Pisum sativum	light responsive
DlMYB82	G-Box	CACGTT	1863	6	+	Pisum sativum	light responsive
DlMYB82	G-box	CACGTG	329	6	+	Arabidopsis thaliana	light responsive
DlMYB82	G-box	CACGTC	341	6	-	Zea mays	light responsive
DlMYB82	G-box	ACACGTGT	605	8	+	Brassica napus	light responsive
DlMYB82	G-box	CACGTG	606	6	+	Arabidopsis thaliana	light responsive
DlMYB83	G-box	TACGTG	1695	6	-	Arabidopsis thaliana	light responsive
DlMYB83	G-Box	CACGTT	1710	6	+	Pisum sativum	light responsive
DlMYB84	G-Box	CACGTT	1049	6	-	Pisum sativum	light responsive
DlMYB84	G-Box	CACGTT	1631	6	+	Pisum sativum	light responsive
DlMYB85	G-box	TACGTG	1109	6	-	Arabidopsis thaliana	light responsive
DlMYB85	G-box	tgACACGTGGCA	1705	11	-	Lycopersicon esculentum	light responsive
DlMYB85	G-box	ACACGTGGC	1706	9	-	Brassica napus	light responsive
DlMYB85	G-box	CACGTG	1708	6	-	Arabidopsis thaliana	light responsive
DlMYB85	G-box	TACGTG	1853	6	-	Arabidopsis thaliana	light responsive
DlMYB85	G-Box	CACGTG	1708	6	-	Pisum sativum	light responsive
DlMYB86	G-box	TACGTG	897	6	+	Arabidopsis thaliana	light responsive
DlMYB86	G-box	CACGTC	965	6	-	Zea mays	light responsive
DlMYB86	G-box	CACGTC	1218	6	-	Zea mays	light responsive
DlMYB86	G-box	TACGTG	1775	6	-	Arabidopsis thaliana	light responsive
DlMYB86	G-Box	CACGTT	1598	6	+	Pisum sativum	light responsive
DlMYB87	G-box	TACGTG	1054	6	+	Arabidopsis thaliana	light responsive
DlMYB87	G-box	TACGTG	1649	6	+	Arabidopsis thaliana	light responsive
DlMYB87	G-box	CACGTC	1908	6	+	Zea mays	light responsive
DlMYB87	G-Box	CACGTT	1813	6	-	Pisum sativum	light responsive
DlMYB89	G-box	TAACACGTAG	1420	9	+	Brassica oleracea	light responsive
DlMYB89	G-box	CAGACGTGGCA	1708	10	-	Nicotiana plumbaginifolia	light responsive
DlMYB89	G-box	CACGTC	1711	6	+	Zea mays	light responsive
DlMYB91	G-Box	CACGTG	1827	6	-	Pisum sativum	light responsive
DlMYB91	G-Box	CACGTT	1834	6	+	Pisum sativum	light responsive
DlMYB91	G-box	CACGTG	1827	6	-	Arabidopsis thaliana	light responsive
DlMYB93	G-Box	CACGTT	1167	6	+	Pisum sativum	light responsive
DlMYB94	G-box	TAAACGTG	1122	8	+	Brassica oleracea	light responsive
DlMYB94	G-box	ACACGTGT	1248	8	-	Brassica napus	light responsive
DlMYB94	G-box	CACGTG	1249	6	-	Arabidopsis thaliana	light responsive
DlMYB94	G-Box	CACGTT	1124	6	-	Pisum sativum	light responsive
DlMYB94	G-Box	CACGTG	1249	6	-	Pisum sativum	light responsive
DlMYB94	G-Box	CACGTT	1281	6	-	Pisum sativum	light responsive
DlMYB106	G-box	TACGTG	517	6	-	Arabidopsis thaliana	light responsive
DlMYB106	G-box	TACGTG	549	6	-	Arabidopsis thaliana	light responsive
DlMYB106	G-box	TACGTG	932	6	+	Arabidopsis thaliana	light responsive
DlMYB107	G-box	TACGTG	57	6	-	Arabidopsis thaliana	light responsive
DlMYB107	G-box	ACACGTGGC	65	9	+	Brassica napus	light responsive
DlMYB107	G-box	CACGTG	66	6	+	Arabidopsis thaliana	light responsive
DlMYB107	G-box	ACACGTGGC	106	9	+	Brassica napus	light responsive
DlMYB107	G-box	CACGTG	107	6	+	Arabidopsis thaliana	light responsive
DlMYB107	G-box	CACGTG	151	6	+	Arabidopsis thaliana	light responsive
DlMYB107	G-Box	CACGTG	66	6	+	Pisum sativum	light responsive
DlMYB107	G-Box	CACGTG	107	6	+	Pisum sativum	light responsive
DlMYB107	G-Box	CACGTG	151	6	+	Pisum sativum	light responsive
DlMYB108	G-box	TACGTG	527	6	+	Arabidopsis thaliana	light responsive
DlMYB108	G-box	TACGTG	907	6	+	Arabidopsis thaliana	light responsive
DlMYB108	G-box	CACGTC	1566	6	-	Zea mays	light responsive
DlMYB108	G-box	TACGTG	1658	6	+	Arabidopsis thaliana	light responsive
DlMYB110	G-box	ACACGTGT	295	8	+	Brassica napus	light responsive
DlMYB110	G-box	CACGTG	296	6	+	Arabidopsis thaliana	light responsive
DlMYB110	G-box	CACGTG	480	6	+	Arabidopsis thaliana	light responsive
DlMYB110	G-box	CACGAC	1395	6	-	Zea mays	light responsive
DlMYB110	G-Box	CACGTG	296	6	+	Pisum sativum	light responsive
DlMYB110	G-Box	CACGTG	480	6	+	Pisum sativum	light responsive
DlMYB112	G-Box	CACGTG	1148	6	-	Pisum sativum	light responsive
DlMYB112	G-Box	CACGTT	1559	6	+	Pisum sativum	light responsive
DlMYB112	G-box	CACGAC	173	6	-	Zea mays	light responsive
DlMYB112	G-box	CACGTG	1148	6	-	Arabidopsis thaliana	light responsive
DlMYB112	G-box	TAAACGTG	1559	8	-	Brassica oleracea	light responsive
DlMYB113	G-Box	CACGTG	1512	6	-	Pisum sativum	light responsive
DlMYB113	G-box	CACGTG	1512	6	-	Arabidopsis thaliana	light responsive
DlMYB114	G-Box	CACGTT	1571	6	-	Pisum sativum	light responsive
DlMYB114	G-box	TACGTG	171	6	-	Arabidopsis thaliana	light responsive
DlMYB114	G-box	CACGTC	378	6	-	Zea mays	light responsive
DlMYB114	G-box	TACGTG	1565	6	-	Arabidopsis thaliana	light responsive
DlMYB114	G-box	TAAACGTG	1569	8	+	Brassica oleracea	light responsive
DlMYB115	G-Box	CACGTT	602	6	-	Pisum sativum	light responsive
DlMYB115	G-box	TACGTG	794	6	-	Arabidopsis thaliana	light responsive
DlMYB116	G-box	CACGTG	614	6	+	Arabidopsis thaliana	light responsive
DlMYB116	G-box	TACGTG	953	6	-	Arabidopsis thaliana	light responsive
DlMYB116	G-Box	CACGTG	614	6	+	Pisum sativum	light responsive
DlMYB117	G-box	CACGAC	1685	6	+	Zea mays	light responsive
DlMYB118	G-box	CACGTG	476	6	+	Arabidopsis thaliana	light responsive
DlMYB118	G-Box	CACGTT	218	6	-	Pisum sativum	light responsive
DlMYB118	G-Box	CACGTG	476	6	+	Pisum sativum	light responsive
DlMYB119	G-box	TACGTG	552	6	-	Arabidopsis thaliana	light responsive
DlMYB96	G-Box	CACGTT	1048	6	-	Pisum sativum	light responsive
DlMYB96	G-Box	CACGTT	1243	6	+	Pisum sativum	light responsive
DlMYB96	G-box	CACGTC	620	6	-	Zea mays	light responsive
DlMYB96	G-box	TAAACGTG	1046	8	+	Brassica oleracea	light responsive
DlMYB96	G-box	TACGTG	1166	6	-	Arabidopsis thaliana	light responsive
DlMYB97	G-box	ACACGTGT	94	8	+	Brassica napus	light responsive
DlMYB97	G-box	CACGTG	95	6	+	Arabidopsis thaliana	light responsive
DlMYB97	G-box	TAACACGTAG	117	9	-	Brassica oleracea	light responsive
DlMYB97	G-box	TACGTG	118	6	+	Arabidopsis thaliana	light responsive
DlMYB97	G-Box	CACGTG	95	6	+	Pisum sativum	light responsive
DlMYB1	GT1-motif	GGTTAA	1231	6	-	Arabidopsis thaliana	light responsive
DlMYB1	Sp1	GGGCGG	668	6	+	Oryza sativa	light responsive
DlMYB10	GT1-motif	GGTTAA	1703	6	+	Arabidopsis thaliana	light responsive
DlMYB11	GT1-motif	GGTTAA	63	6	+	Arabidopsis thaliana	light responsive
DlMYB12	Sp1	GGGCGG	1488	6	-	Oryza sativa	light responsive
DlMYB13	GT1-motif	GGTTAA	1267	6	-	Arabidopsis thaliana	light responsive
DlMYB13	GT1-motif	GGTTAAT	1274	7	-	Avena sativa	light responsive
DlMYB13	GT1-motif	GGTTAA	1275	6	-	Arabidopsis thaliana	light responsive
DlMYB14	GT1-motif	GGTTAA	1105	6	+	Arabidopsis thaliana	light responsive
DlMYB15	GT1-motif	GGTTAA	1105	6	+	Arabidopsis thaliana	light responsive
DlMYB16	GT1-motif	GGTTAA	1732	6	-	Arabidopsis thaliana	light responsive
DlMYB17	3-AF1 binding site	TAAGAGAGGAA	1829	10	-	Solanum tuberosum	light responsive
DlMYB17	GT1-motif	GGTTAAT	367	7	+	Avena sativa	light responsive
DlMYB18	GT1-motif	GGTTAA	566	6	+	Arabidopsis thaliana	light responsive
DlMYB18	GT1-motif	GGTTAA	1179	6	-	Arabidopsis thaliana	light responsive
DlMYB19	GT1-motif	GGTTAA	1493	6	-	Arabidopsis thaliana	light responsive
DlMYB2	GT1-motif	GGTTAA	216	6	-	Arabidopsis thaliana	light responsive
DlMYB20	GT1-motif	GGTTAA	947	6	-	Arabidopsis thaliana	light responsive
DlMYB20	GT1-motif	GGTTAA	1497	6	-	Arabidopsis thaliana	light responsive
DlMYB21	GT1-motif	GGTTAAT	889	7	-	Avena sativa	light responsive
DlMYB21	GT1-motif	GGTTAA	890	6	-	Arabidopsis thaliana	light responsive
DlMYB21	GT1-motif	GGTTAAT	1198	7	-	Avena sativa	light responsive
DlMYB21	GT1-motif	GGTTAA	1199	6	-	Arabidopsis thaliana	light responsive
DlMYB22	GT1-motif	GGTTAAT	962	7	+	Avena sativa	light responsive
DlMYB22	GT1-motif	GGTTAA	1453	6	+	Arabidopsis thaliana	light responsive
DlMYB22	GT1-motif	GGTTAA	1566	6	-	Arabidopsis thaliana	light responsive
DlMYB22	GT1-motif	GGTTAAT	1620	7	+	Avena sativa	light responsive
DlMYB23	GT1-motif	GGTTAA	751	6	-	Arabidopsis thaliana	light responsive
DlMYB23	GT1-motif	GGTTAA	902	6	-	Arabidopsis thaliana	light responsive
DlMYB23	GT1-motif	GGTTAAT	1906	7	-	Avena sativa	light responsive
DlMYB23	GT1-motif	GGTTAA	1907	6	-	Arabidopsis thaliana	light responsive
DlMYB26	GT1-motif	GGTTAAT	1036	7	+	Avena sativa	light responsive
DlMYB26	GT1-motif	GGTTAAT	1832	7	+	Avena sativa	light responsive
DlMYB27	GT1-motif	GGTTAA	1126	6	+	Arabidopsis thaliana	light responsive
DlMYB27	GT1-motif	GGTTAA	1336	6	-	Arabidopsis thaliana	light responsive
DlMYB27	Sp1	GGGCGG	423	6	-	Oryza sativa	light responsive
DlMYB28	GT1-motif	GGTTAAT	745	7	+	Avena sativa	light responsive
DlMYB28	GT1-motif	GGTTAAT	1327	7	+	Avena sativa	light responsive
DlMYB29	GT1-motif	GGTTAAT	915	7	+	Avena sativa	light responsive
DlMYB29	GT1-motif	GGTTAAT	1480	7	+	Avena sativa	light responsive
DlMYB3	GT1-motif	GGTTAA	345	6	-	Arabidopsis thaliana	light responsive
DlMYB3	GT1-motif	GGTTAA	878	6	-	Arabidopsis thaliana	light responsive
DlMYB3	GT1-motif	GGTTAA	1841	6	+	Arabidopsis thaliana	light responsive
DlMYB30	GT1-motif	GGTTAA	110	6	-	Arabidopsis thaliana	light responsive
DlMYB30	GT1-motif	GGTTAA	507	6	-	Arabidopsis thaliana	light responsive
DlMYB31	GT1-motif	GGTTAA	472	6	-	Arabidopsis thaliana	light responsive
DlMYB32	GT1-motif	GGTTAA	63	6	+	Arabidopsis thaliana	light responsive
DlMYB33	GT1-motif	GGTTAA	236	6	+	Arabidopsis thaliana	light responsive
DlMYB33	GT1-motif	GGTTAA	912	6	+	Arabidopsis thaliana	light responsive
DlMYB33	Sp1	GGGCGG	321	6	-	Oryza sativa	light responsive
DlMYB34	GT1-motif	GGTTAAT	370	7	+	Avena sativa	light responsive
DlMYB36	GT1-motif	GGTTAAT	1907	7	+	Avena sativa	light responsive
DlMYB38	GT1-motif	GGTTAA	216	6	+	Arabidopsis thaliana	light responsive
DlMYB4	GT1-motif	GGTTAA	732	6	-	Arabidopsis thaliana	light responsive
DlMYB40	Sp1	GGGCGG	1443	6	-	Oryza sativa	light responsive
DlMYB41	GT1-motif	GGTTAA	675	6	+	Arabidopsis thaliana	light responsive
DlMYB41	GT1-motif	GGTTAA	1377	6	-	Arabidopsis thaliana	light responsive
DlMYB42	GT1-motif	GGTTAA	534	6	+	Arabidopsis thaliana	light responsive
DlMYB42	GT1-motif	GGTTAAT	1325	7	-	Avena sativa	light responsive
DlMYB42	GT1-motif	GGTTAA	1326	6	-	Arabidopsis thaliana	light responsive
DlMYB43	GT1-motif	GGTTAA	1290	6	-	Arabidopsis thaliana	light responsive
DlMYB44	GT1-motif	GGTTAAT	1928	7	-	Avena sativa	light responsive
DlMYB44	GT1-motif	GGTTAA	1929	6	-	Arabidopsis thaliana	light responsive
DlMYB48	3-AF1 binding site	TAAGAGAGGAA	1896	10	+	Solanum tuberosum	light responsive
DlMYB48	GT1-motif	GGTTAAT	1091	7	-	Avena sativa	light responsive
DlMYB48	GT1-motif	GGTTAA	1092	6	-	Arabidopsis thaliana	light responsive
DlMYB48	GT1-motif	GGTTAA	1111	6	-	Arabidopsis thaliana	light responsive
DlMYB49	GT1-motif	GGTTAAT	73	7	+	Avena sativa	light responsive
DlMYB49	GT1-motif	GGTTAA	1954	6	-	Arabidopsis thaliana	light responsive
DlMYB50	GT1-motif	GGTTAA	1981	6	-	Arabidopsis thaliana	light responsive
DlMYB6	GT1-motif	GGTTAA	288	6	-	Arabidopsis thaliana	light responsive
DlMYB6	GT1-motif	GGTTAA	1426	6	+	Arabidopsis thaliana	light responsive
DlMYB6	GT1-motif	GGTTAA	1428	6	-	Arabidopsis thaliana	light responsive
DlMYB7	GT1-motif	GGTTAA	633	6	+	Arabidopsis thaliana	light responsive
DlMYB8	GT1-motif	GTGTGTGAA	275	9	-	Solanum tuberosum	light responsive
DlMYB8	GT1-motif	GGTTAA	698	6	+	Arabidopsis thaliana	light responsive
DlMYB100	GT1-motif	GGTTAA	432	6	-	Arabidopsis thaliana	light responsive
DlMYB100	3-AF1 binding site	TAAGAGAGGAA	1319	10	+	Solanum tuberosum	light responsive
DlMYB100	3-AF1 binding site	TAAGAGAGGAA	1753	10	+	Solanum tuberosum	light responsive
DlMYB101	GT1-motif	GGTTAA	1417	6	+	Arabidopsis thaliana	light responsive
DlMYB102	GT1-motif	GGTTAA	1083	6	-	Arabidopsis thaliana	light responsive
DlMYB103	GT1-motif	GGTTAA	242	6	-	Arabidopsis thaliana	light responsive
DlMYB103	Sp1	GGGCGG	148	6	+	Oryza sativa	light responsive
DlMYB104	GT1-motif	GGTTAA	232	6	-	Arabidopsis thaliana	light responsive
DlMYB104	GT1-motif	GGTTAA	639	6	+	Arabidopsis thaliana	light responsive
DlMYB104	GT1-motif	GGTTAA	673	6	+	Arabidopsis thaliana	light responsive
DlMYB104	GT1-motif	GGTTAA	1590	6	-	Arabidopsis thaliana	light responsive
DlMYB104	Sp1	GGGCGG	1261	6	-	Oryza sativa	light responsive
DlMYB53	GT1-motif	GGTTAA	47	6	+	Arabidopsis thaliana	light responsive
DlMYB54	GT1-motif	GGTTAAT	772	7	+	Avena sativa	light responsive
DlMYB56	GT1-motif	GGTTAA	362	6	-	Arabidopsis thaliana	light responsive
DlMYB56	GT1-motif	GGTTAA	1829	6	-	Arabidopsis thaliana	light responsive
DlMYB58	GT1-motif	GGTTAAT	53	7	-	Avena sativa	light responsive
DlMYB58	GT1-motif	GGTTAA	54	6	-	Arabidopsis thaliana	light responsive
DlMYB58	GT1-motif	GGTTAA	242	6	-	Arabidopsis thaliana	light responsive
DlMYB59	AAAC-motif	CAATCAAAACCT	1186	11	-	Spinacia oleracea	light responsive
DlMYB59	GT1-motif	GGTTAAT	726	7	+	Avena sativa	light responsive
DlMYB60	Sp1	GGGCGG	13	6	+	Oryza sativa	light responsive
DlMYB61	GT1-motif	GGTTAA	1725	6	-	Arabidopsis thaliana	light responsive
DlMYB62	GT1-motif	GGTTAAT	465	7	-	Avena sativa	light responsive
DlMYB62	GT1-motif	GGTTAA	466	6	-	Arabidopsis thaliana	light responsive
DlMYB62	GT1-motif	GGTTAA	1382	6	-	Arabidopsis thaliana	light responsive
DlMYB62	3-AF1 binding site	TAAGAGAGGAA	1819	10	+	Solanum tuberosum	light responsive
DlMYB63	GT1-motif	GGTTAA	1345	6	-	Arabidopsis thaliana	light responsive
DlMYB63	GT1-motif	GGTTAA	1466	6	-	Arabidopsis thaliana	light responsive
DlMYB63	3-AF1 binding site	TAAGAGAGGAA	1837	10	+	Solanum tuberosum	light responsive
DlMYB64	3-AF1 binding site	TAAGAGAGGAA	1819	10	+	Solanum tuberosum	light responsive
DlMYB64	GT1-motif	GGTTAA	1383	6	-	Arabidopsis thaliana	light responsive
DlMYB65	GT1-motif	GGTTAA	1345	6	-	Arabidopsis thaliana	light responsive
DlMYB65	GT1-motif	GGTTAA	1466	6	-	Arabidopsis thaliana	light responsive
DlMYB65	3-AF1 binding site	TAAGAGAGGAA	1837	10	+	Solanum tuberosum	light responsive
DlMYB66	GT1-motif	GGTTAAT	364	7	-	Avena sativa	light responsive
DlMYB66	GT1-motif	GGTTAA	365	6	-	Arabidopsis thaliana	light responsive
DlMYB67	GT1-motif	GGTTAA	1531	6	-	Arabidopsis thaliana	light responsive
DlMYB67	GT1-motif	GGTTAA	1787	6	-	Arabidopsis thaliana	light responsive
DlMYB69	GT1-motif	GGTTAAT	16	7	+	Avena sativa	light responsive
DlMYB69	GT1-motif	GGTTAAT	144	7	-	Avena sativa	light responsive
DlMYB69	GT1-motif	GGTTAA	145	6	-	Arabidopsis thaliana	light responsive
DlMYB69	GT1-motif	GCGGTAATT	993	9	+	Oryza sativa	light responsive
DlMYB71	GT1-motif	GGTTAAT	277	7	+	Avena sativa	light responsive
DlMYB73	GT1-motif	GGTTAA	1093	6	+	Arabidopsis thaliana	light responsive
DlMYB73	GT1-motif	GGTTAA	1686	6	-	Arabidopsis thaliana	light responsive
DlMYB73	GT1-motif	GGTTAA	1979	6	+	Arabidopsis thaliana	light responsive
DlMYB73	GT1-motif	GGTTAA	1981	6	-	Arabidopsis thaliana	light responsive
DlMYB74	GT1-motif	GGTTAA	1455	6	+	Arabidopsis thaliana	light responsive
DlMYB74	GT1-motif	GGTTAA	1471	6	+	Arabidopsis thaliana	light responsive
DlMYB74	GT1-motif	GGTTAA	1908	6	+	Arabidopsis thaliana	light responsive
DlMYB75	GT1-motif	GGTTAAT	980	7	+	Avena sativa	light responsive
DlMYB76	GT1-motif	GGTTAA	668	6	+	Arabidopsis thaliana	light responsive
DlMYB77	Sp1	GGGCGG	1389	6	-	Oryza sativa	light responsive
DlMYB79	3-AF1 binding site	TAAGAGAGGAA	1645	10	-	Solanum tuberosum	light responsive
DlMYB80	GT1-motif	GTGTGTGAA	1947	9	-	Solanum tuberosum	light responsive
DlMYB83	GT1-motif	GGTTAA	1202	6	+	Arabidopsis thaliana	light responsive
DlMYB83	GT1-motif	GGTTAAT	1448	7	+	Avena sativa	light responsive
DlMYB84	GT1-motif	GGTTAA	346	6	+	Arabidopsis thaliana	light responsive
DlMYB84	GT1-motif	GGTTAA	531	6	-	Arabidopsis thaliana	light responsive
DlMYB85	GT1-motif	GGTTAA	1794	6	+	Arabidopsis thaliana	light responsive
DlMYB85	GT1-motif	GGTTAAT	1808	7	-	Avena sativa	light responsive
DlMYB85	GT1-motif	GGTTAA	1809	6	-	Arabidopsis thaliana	light responsive
DlMYB86	GT1-motif	GGTTAA	1125	6	+	Arabidopsis thaliana	light responsive
DlMYB86	3-AF1 binding site	TAAGAGAGGAA	1963	10	-	Solanum tuberosum	light responsive
DlMYB87	GT1-motif	GGTTAA	507	6	+	Arabidopsis thaliana	light responsive
DlMYB87	GT1-motif	GGTTAA	1692	6	-	Arabidopsis thaliana	light responsive
DlMYB87	GT1-motif	GGTTAA	1794	6	+	Arabidopsis thaliana	light responsive
DlMYB87	GT1-motif	GGTTAAT	1827	7	+	Avena sativa	light responsive
DlMYB87	3-AF1 binding site	TAAGAGAGGAA	135	10	-	Solanum tuberosum	light responsive
DlMYB88	GT1-motif	GGTTAA	587	6	+	Arabidopsis thaliana	light responsive
DlMYB89	3-AF1 binding site	TAAGAGAGGAA	711	10	-	Solanum tuberosum	light responsive
DlMYB90	GT1-motif	GGTTAA	994	6	+	Arabidopsis thaliana	light responsive
DlMYB90	GT1-motif	GGTTAA	1970	6	+	Arabidopsis thaliana	light responsive
DlMYB93	GT1-motif	GGTTAA	1399	6	-	Arabidopsis thaliana	light responsive
DlMYB93	GT1-motif	GGTTAA	1579	6	+	Arabidopsis thaliana	light responsive
DlMYB94	GT1-motif	GGTTAA	1948	6	-	Arabidopsis thaliana	light responsive
DlMYB94	3-AF1 binding site	TAAGAGAGGAA	405	10	+	Solanum tuberosum	light responsive
DlMYB95	GT1-motif	GGTTAA	1811	6	-	Arabidopsis thaliana	light responsive
DlMYB95	3-AF1 binding site	TAAGAGAGGAA	822	10	-	Solanum tuberosum	light responsive
DlMYB105	GT1-motif	GGTTAA	1434	6	+	Arabidopsis thaliana	light responsive
DlMYB106	AAAC-motif	CAATCAAAACCT	727	11	-	Spinacia oleracea	light responsive
DlMYB108	Sp1	GGGCGG	1550	6	+	Oryza sativa	light responsive
DlMYB108	GT1-motif	GGTTAAT	1948	7	-	Avena sativa	light responsive
DlMYB108	GT1-motif	GGTTAA	1949	6	-	Arabidopsis thaliana	light responsive
DlMYB109	GT1-motif	GGTTAA	85	6	-	Arabidopsis thaliana	light responsive
DlMYB109	GT1-motif	GGTTAA	1642	6	-	Arabidopsis thaliana	light responsive
DlMYB111	GT1-motif	GGTTAA	1794	6	-	Arabidopsis thaliana	light responsive
DlMYB112	3-AF1 binding site	TAAGAGAGGAA	621	10	+	Solanum tuberosum	light responsive
DlMYB112	GT1-motif	GGTTAAT	939	7	+	Avena sativa	light responsive
DlMYB112	GT1-motif	GGTTAA	1465	6	+	Arabidopsis thaliana	light responsive
DlMYB114	GT1-motif	GGTTAA	443	6	+	Arabidopsis thaliana	light responsive
DlMYB115	GT1-motif	GTGTGTGAA	238	9	-	Solanum tuberosum	light responsive
DlMYB116	3-AF1 binding site	TAAGAGAGGAA	1136	10	-	Solanum tuberosum	light responsive
DlMYB116	GT1-motif	GGTTAA	245	6	-	Arabidopsis thaliana	light responsive
DlMYB116	GT1-motif	GGTTAA	1853	6	-	Arabidopsis thaliana	light responsive
DlMYB117	GT1-motif	GGTTAA	255	6	+	Arabidopsis thaliana	light responsive
DlMYB117	GT1-motif	GGTTAA	553	6	-	Arabidopsis thaliana	light responsive
DlMYB118	GT1-motif	GGTTAAT	168	7	-	Avena sativa	light responsive
DlMYB118	GT1-motif	GGTTAA	169	6	-	Arabidopsis thaliana	light responsive
DlMYB118	GT1-motif	GGTTAA	550	6	-	Arabidopsis thaliana	light responsive
DlMYB118	3-AF1 binding site	TAAGAGAGGAA	1202	10	+	Solanum tuberosum	light responsive
DlMYB119	GT1-motif	GGTTAAT	1925	7	-	Avena sativa	light responsive
DlMYB119	GT1-motif	GGTTAA	1926	6	-	Arabidopsis thaliana	light responsive
DlMYB96	GT1-motif	GGTTAAT	507	7	+	Avena sativa	light responsive
DlMYB98	3-AF1 binding site	TAAGAGAGGAA	320	10	+	Solanum tuberosum	light responsive
DlMYB98	GT1-motif	GGTTAA	670	6	+	Arabidopsis thaliana	light responsive
DlMYB98	4cl-CMA2b	TCTCACCAACCACA	297	13	-	Solanum tuberosum	light responsive
DlMYB99	GT1-motif	GGTTAA	246	6	-	Arabidopsis thaliana	light responsive
DlMYB1	MRE	AACCTAA	1627	7	+	Petroselinum crispum	light responsive
DlMYB14	MRE	AACCTAA	1021	7	+	Petroselinum crispum	light responsive
DlMYB14	MRE	AACCTAA	1058	7	+	Petroselinum crispum	light responsive
DlMYB14	MRE	AACCTAA	1102	7	-	Petroselinum crispum	light responsive
DlMYB15	MRE	AACCTAA	1021	7	+	Petroselinum crispum	light responsive
DlMYB15	MRE	AACCTAA	1058	7	+	Petroselinum crispum	light responsive
DlMYB15	MRE	AACCTAA	1102	7	-	Petroselinum crispum	light responsive
DlMYB17	MRE	AACCTAA	144	7	+	Petroselinum crispum	light responsive
DlMYB23	MRE	AACCTAA	971	7	-	Petroselinum crispum	light responsive
DlMYB26	MRE	AACCTAA	479	7	-	Petroselinum crispum	light responsive
DlMYB3	MRE	AACCTAA	347	7	+	Petroselinum crispum	light responsive
DlMYB3	MRE	AACCTAA	352	7	+	Petroselinum crispum	light responsive
DlMYB32	MRE	AACCTAA	26	7	-	Petroselinum crispum	light responsive
DlMYB32	MRE	AACCTAA	549	7	+	Petroselinum crispum	light responsive
DlMYB32	MRE	AACCTAA	807	7	-	Petroselinum crispum	light responsive
DlMYB36	MRE	AACCTAA	314	7	+	Petroselinum crispum	light responsive
DlMYB36	MRE	AACCTAA	636	7	+	Petroselinum crispum	light responsive
DlMYB38	MRE	AACCTAA	526	7	+	Petroselinum crispum	light responsive
DlMYB49	MRE	AACCTAA	70	7	-	Petroselinum crispum	light responsive
DlMYB8	MRE	AACCTAA	772	7	+	Petroselinum crispum	light responsive
DlMYB8	MRE	AACCTAA	1057	7	+	Petroselinum crispum	light responsive
DlMYB100	MRE	AACCTAA	434	7	+	Petroselinum crispum	light responsive
DlMYB101	MRE	AACCTAA	818	7	-	Petroselinum crispum	light responsive
DlMYB101	MRE	AACCTAA	929	7	-	Petroselinum crispum	light responsive
DlMYB101	MRE	AACCTAA	996	7	-	Petroselinum crispum	light responsive
DlMYB103	MRE	AACCTAA	606	7	-	Petroselinum crispum	light responsive
DlMYB103	MRE	AACCTAA	1126	7	+	Petroselinum crispum	light responsive
DlMYB104	MRE	AACCTAA	243	7	+	Petroselinum crispum	light responsive
DlMYB55	MRE	AACCTAA	1210	7	-	Petroselinum crispum	light responsive
DlMYB56	MRE	AACCTAA	776	7	+	Petroselinum crispum	light responsive
DlMYB56	MRE	AACCTAA	789	7	-	Petroselinum crispum	light responsive
DlMYB56	MRE	AACCTAA	851	7	-	Petroselinum crispum	light responsive
DlMYB56	MRE	AACCTAA	1004	7	+	Petroselinum crispum	light responsive
DlMYB56	MRE	AACCTAA	1587	7	-	Petroselinum crispum	light responsive
DlMYB59	MRE	AACCTAA	1048	7	+	Petroselinum crispum	light responsive
DlMYB66	MRE	AACCTAA	482	7	+	Petroselinum crispum	light responsive
DlMYB67	MRE	AACCTAA	749	7	+	Petroselinum crispum	light responsive
DlMYB68	MRE	AACCTAA	228	7	+	Petroselinum crispum	light responsive
DlMYB73	MRE	AACCTAA	1660	7	-	Petroselinum crispum	light responsive
DlMYB74	MRE	AACCTAA	1561	7	-	Petroselinum crispum	light responsive
DlMYB75	MRE	AACCTAA	433	7	-	Petroselinum crispum	light responsive
DlMYB75	MRE	AACCTAA	569	7	+	Petroselinum crispum	light responsive
DlMYB83	MRE	AACCTAA	832	7	-	Petroselinum crispum	light responsive
DlMYB83	MRE	AACCTAA	1043	7	+	Petroselinum crispum	light responsive
DlMYB87	MRE	AACCTAA	1791	7	-	Petroselinum crispum	light responsive
DlMYB89	MRE	AACCTAA	1021	7	+	Petroselinum crispum	light responsive
DlMYB90	MRE	AACCTAA	125	7	+	Petroselinum crispum	light responsive
DlMYB90	MRE	AACCTAA	720	7	+	Petroselinum crispum	light responsive
DlMYB90	MRE	AACCTAA	963	7	+	Petroselinum crispum	light responsive
DlMYB91	MRE	AACCTAA	686	7	+	Petroselinum crispum	light responsive
DlMYB93	MRE	AACCTAA	901	7	+	Petroselinum crispum	light responsive
DlMYB94	MRE	AACCTAA	394	7	+	Petroselinum crispum	light responsive
DlMYB95	MRE	AACCTAA	1014	7	-	Petroselinum crispum	light responsive
DlMYB95	MRE	AACCTAA	1392	7	+	Petroselinum crispum	light responsive
DlMYB107	MRE	AACCTAA	1104	7	+	Petroselinum crispum	light responsive
DlMYB112	MRE	AACCTAA	1293	7	+	Petroselinum crispum	light responsive
DlMYB115	MRE	AACCTAA	1991	7	-	Petroselinum crispum	light responsive
DlMYB117	MRE	AACCTAA	1597	7	+	Petroselinum crispum	light responsive
DlMYB37	Box 4	ATTAAT	582	6	+	Petroselinum crispum	light responsive
DlMYB37	Box 4	ATTAAT	646	6	+	Petroselinum crispum	light responsive
DlMYB37	Box 4	ATTAAT	1011	6	-	Petroselinum crispum	light responsive
DlMYB37	Box 4	ATTAAT	1048	6	-	Petroselinum crispum	light responsive
DlMYB92	Box 4	ATTAAT	922	6	+	Petroselinum crispum	light responsive
[truncated: 81 more rows]

## Sheet: Table S6
Table S6. Number of cis-regulatory elements in longan R2R3-MYB genes
Cis-regulatory elements	Number contained in DlMYB genes	Functional categories
ABA responsiveness	101	phytohormone-related
anaerobic induction	102	environmental stress-related
auxin-responsive	52	phytohormone-related
circadian control	23	environmental stress-related
defense and stress responsiveness	45	environmental stress-related
drought inducibility	61	environmental stress-related
flavonoid biosynthetic	13	cellular development or photoresponsive
gibberellin responsive	70	phytohormone-related
light responsiveness	119	environmental stress-related
low temperature responsiveness	44	environmental stress-related
MeJA responsiveness	79	phytohormone-related
meristem expression	34	cellular development or photoresponsive
salicylic acid responsiveness	56	phytohormone-related
wound-responsive	4	environmental stress-related

## Sheet: Table S7
Table S7. Numbers of genes from different origins in the Dimocarpus longan genome
	No. of genes	No. of genes from different origins (percentage %)
		Singletons	Dispersed	Proximal	Tandem	WGD/Segmental
The whole genome	37142	5,590 (15.05%)	17,013 (45.81%)	4,799 (12.92%)	4,252 (11.45%)	5,488 (14.78%)
R2R3-MYB family	119	0 (0.0%)	58 (48.74%)	9 (7.56%)	16 (13.45%)	36 (30.25%)

## Sheet: Table S8
Table S8. Ka/Ks values for segmentally and tandemly duplicated R2R3-MYB gene pairs in longan
Duplicated pairs	Ka	Ks	Ka/Ks	Purifying selection	Duplicate type	Chromosome location
DlMYB106-DlMYB107	0.412717	1.71819	0.240204	Yes	Tandem	Chr1-Chr1
DlMYB1-DlMYB2	0.406172	2.59472	0.156538	Yes	Tandem	Chr15-Chr15
DlMYB2-DlMYB3	0.152518	0.380179	0.401176	Yes	Tandem	Chr1-Chr1
DlMYB52-DlMYB53	0.0806132	0.141534	0.569568	Yes	Tandem	Chr1-Chr1
DlMYB53-DlMYB54	0.0611099	0.155664	0.392575	Yes	Tandem	Chr8-Chr8
DlMYB54-DlMYB55	0.0849182	0.250947	0.338391	Yes	Tandem	Chr8-Chr8
DlMYB5-DlMYB6	0.425415	2.05138	0.20738	Yes	Tandem	Chr8-Chr8
DlMYB6-DlMYB7	0.386253	2.9323	0.131724	Yes	Tandem	Chr1-Chr1
DlMYB81-DlMYB82	0.417277	3.13125	0.133262	Yes	Tandem	Chr12-Chr12
DlMYB85-DlMYB86	0.350133	0.415393	0.842896	Yes	Tandem	Chr12-Chr12
DlMYB114-DlMYB57	0.327183	2.16965	0.1508	Yes	Segmental	Chr1-Chr1
DlMYB13-DlMYB31	0.188564	2.33061	0.0809077	Yes	Segmental	Chr1-Chr3
DlMYB14-DlMYB15	NA	NA	NA	Yes	Segmental	Chr1-Chr1
DlMYB1-DlMYB22	0.455225	3.07127	0.14822	Yes	Segmental	Chr1-Chr1
DlMYB1-DlMYB5	0.393116	1.9642	0.200141	Yes	Segmental	Chr1-Chr1
DlMYB2-DlMYB3	0.152518	0.380179	0.401176	Yes	Segmental	Chr1-Chr4
DlMYB2-DlMYB6	0.510836	2.72232	0.187647	Yes	Segmental	Chr10-Chr14
DlMYB30-DlMYB59	0.437174	2.83105	0.154421	Yes	Segmental	Chr10-Chr12
DlMYB44-DlMYB66	0.368075	2.41622	0.152335	Yes	Segmental	Chr10-Chr15
DlMYB47-DlMYB62	0.310916	1.27237	0.24436	Yes	Segmental	Chr10-Chr15
DlMYB71-DlMYB56	0.273026	2.1077	0.129538	Yes	Segmental	Chr10-Chr8
DlMYB72-DlMYB116	0.456572	1.97432	0.231255	Yes	Segmental	Chr11-Chr6
DlMYB74-DlMYB104	0.515366	2.07027	0.248936	Yes	Segmental	Chr11-Chr6
DlMYB76-DlMYB110	0.381061	3.46039	0.110121	Yes	Segmental	Chr11-Chr9
DlMYB76-DlMYB88	0.404492	3.05694	0.132319	Yes	Segmental	Chr12-Chr15
DlMYB78-DlMYB43	0.220147	4.36481	0.0504368	Yes	Segmental	Chr12-Chr15
DlMYB78-DlMYB67	0.395574	2.61756	0.151123	Yes	Segmental	Chr12-Chr7
DlMYB79-DlMYB42	0.53158	2.77248	0.191734	Yes	Segmental	Chr12-Chr2
DlMYB80-DlMYB18	0.500218	2.32944	0.214737	Yes	Segmental	Chr12-Chr7
DlMYB81-DlMYB50	0.576044	2.38999	0.241024	Yes	Segmental	Chr13-Chr14
DlMYB83-DlMYB49	0.283219	2.47899	0.114248	Yes	Segmental	Chr15-Chr4
DlMYB85-DlMYB111	0.617986	2.71982	0.227215	Yes	Segmental	Chr15-Chr8
DlMYB88-DlMYB110	0.346227	3.66874	0.0943721	Yes	Segmental	Chr4-Chr8
DlMYB92-DlMYB99	0.360218	1.46457	0.245954	Yes	Segmental	Chr6-Chr9
DlMYB106-DlMYB35	0.412427	1.71239	0.240849	Yes	Segmental	Chr6-Chr9

## Sheet: Table S9
Table S9. Ka/Ks values for colinear gene pairs among longan (Dimocarpus longan), Arabidopsis (Arabidopsis thaliana), litchi (Litchi chinensis), yellowhorn (Xanthoceras sorbifolium), rice (Oryza sativa), and maize (Zea mays)
	Collinear gene pairs		Ka	Ks	Ka/Ks
Dimocarpus longan - Arabidopsis thaliana	DlMYB100	AT3G53200.1	0.368401	3.53927	0.10409
	DlMYB103	AT3G01140.1	0.268871	3.61665	0.0743425
	DlMYB103	AT5G15310.1	0.213045	4.21617	0.0505305
	DlMYB104	AT3G29020.2	0.421405	2.29975	0.183239
	DlMYB105	AT3G28910.1	0.283486	2.65056	0.106954
	DlMYB108	AT1G63910.1	0.05703	4.28371	0.0133132
	DlMYB110	AT3G27920.1	0.471326	2.88826	0.163187
	DlMYB110	AT5G40330.1	0.447841	2.81256	0.159229
	DlMYB111	AT3G27785.1	0.531962	2.78691	0.190879
	DlMYB111	AT5G40360.1	0.635684	2.71337	0.234279
	DlMYB114	AT4G12350.1	0.270161	4.14161	0.0652309
	DlMYB114	AT4G22680.1	0.298831	3.78769	0.0788953
	DlMYB116	AT1G68320.1	0.483	2.94791	0.163845
	DlMYB117	AT1G74650.1	0.281872	2.10496	0.133909
	DlMYB117	AT3G47600.1	0.322066	2.7162	0.118572
	DlMYB12	AT5G57620.1	0.356502	2.9727	0.119925
	DlMYB13	AT3G23250.1	0.353191	3.27657	0.107793
	DlMYB15	AT4G13480.1	0.297017	2.45207	0.121129
	DlMYB16	AT1G48000.1	0.345117	3.22591	0.106983
	DlMYB17	AT5G54230.1	0.426131	3.05444	0.139512
	DlMYB18	AT4G26930.1	0.450181	2.55335	0.17631
	DlMYB18	AT5G55020.1	0.453883	2.39344	0.189636
	DlMYB19	AT5G56110.1	0.240188	3.40256	0.0705902
	DlMYB26	AT3G13890.1	0.449862	3.00752	0.149579
	DlMYB30	AT3G61250.1	0.213231	1.98004	0.10769
	DlMYB31	AT2G31180.1	0.208639	3.18607	0.0654849
	DlMYB31	AT3G23250.1	0.238176	2.71549	0.0877104
	DlMYB32	AT2G47460.1	0.474105	3.47159	0.136567
	DlMYB32	AT3G62610.1	0.502715	2.80195	0.179416
	DlMYB32	AT5G49330.1	0.509617	3.02734	0.168338
	DlMYB33	AT2G47190.1	0.364782	3.43973	0.10605
	DlMYB34	AT4G01680.2	0.344674	3.24273	0.106291
	DlMYB36	AT3G55730.1	0.640782	2.26959	0.282334
	DlMYB37	AT5G26660.1	0.429522	3.06316	0.140222
	DlMYB38	AT3G02940.1	0.163471	3.65103	0.0447738
	DlMYB40	AT5G17800.1	0.574229	2.56138	0.224187
	DlMYB42	AT4G34990.1	0.556477	2.7252	0.204197
	DlMYB42	AT4G38620.1	0.580842	2.54361	0.228353
	DlMYB44	AT3G49690.1	0.416683	3.27915	0.127071
	DlMYB44	AT4G37780.1	0.460908	3.09927	0.148715
	DlMYB44	AT5G65790.1	0.432471	3.20945	0.13475
	DlMYB47	AT5G10280.1	0.38577	2.13745	0.180481
	DlMYB49	AT4G05100.1	0.230107	3.71668	0.0619118
	DlMYB49	AT4G21440.1	0.257549	3.79003	0.0679544
	DlMYB49	AT5G54230.1	0.398492	3.38104	0.117861
	DlMYB51	AT1G66230.1	0.147998	2.12243	0.0697304
	DlMYB51	AT5G16600.1	0.173368	1.47761	0.11733
	DlMYB52	AT1G66370.1	0.482134	3.25474	0.148133
	DlMYB57	AT4G12350.1	0.416661	3.60284	0.115648
	DlMYB57	AT4G22680.1	0.35132	3.66031	0.0959811
	DlMYB57	AT5G62320.1	0.400519	3.38793	0.118219
	DlMYB58	AT3G48920.1	0.429777	3.07735	0.139658
	DlMYB58	AT4G25560.1	0.616419	2.13351	0.288922
	DlMYB58	AT5G52260.1	0.608366	1.89818	0.320499
	DlMYB60	AT1G16490.1	0.533637	3.3223	0.160623
	DlMYB60	AT1G56160.1	0.553896	2.5499	0.217222
	DlMYB60	AT1G79180.1	0.498543	2.98041	0.167273
	DlMYB61	AT3G12720.1	0.352598	3.84566	0.0916874
	DlMYB62	AT1G34670.1	0.27878	2.70291	0.103141
	DlMYB62	AT5G65230.1	0.380307	3.16856	0.120025
	DlMYB66	AT3G49690.1	0.531758	2.87171	0.185171
	DlMYB66	AT4G37780.1	0.501362	3.02729	0.165614
	DlMYB67	AT3G50060.1	0.374692	3.1817	0.117765
	DlMYB67	AT5G67300.1	0.353695	3.25432	0.108685
	DlMYB70	AT1G22640.1	0.334223	3.58981	0.0931033
	DlMYB70	AT1G35515.1	0.27867	3.36087	0.0829161
	DlMYB70	AT4G09460.1	0.296689	3.78083	0.0784719
	DlMYB72	AT1G25340.1	0.371909	3.33167	0.111628
	DlMYB72	AT1G68320.1	0.422648	1.93153	0.218816
	DlMYB74	AT1G26780.2	0.558186	2.73378	0.204181
	DlMYB74	AT1G69560.1	0.478413	3.40765	0.140394
	DlMYB75	AT1G14350.1	0.2384	2.00781	0.118736
	DlMYB75	AT2G02820.2	0.253711	1.69508	0.149675
	DlMYB77	AT3G08500.1	0.3416	3.38127	0.101027
	DlMYB78	AT2G23290.1	0.471274	2.86426	0.164536
	DlMYB78	AT5G67300.1	0.434653	3.13868	0.138483
	DlMYB79	AT2G16720.1	0.300975	3.16738	0.0950232
	DlMYB79	AT4G34990.1	0.287692	3.25022	0.0885146
	DlMYB79	AT4G38620.1	0.271286	3.38463	0.0801522
	DlMYB80	AT2G32460.1	0.542373	2.4701	0.219575
	DlMYB80	AT5G55020.1	0.709856	2.04391	0.347303
	DlMYB83	AT5G54230.1	0.407605	2.76691	0.147314
	DlMYB84	AT5G14340.1	0.334348	3.56071	0.0938993
	DlMYB85	AT3G27785.1	0.65304	2.51509	0.259649
	DlMYB85	AT5G40360.1	0.711155	2.25931	0.314767
	DlMYB87	AT3G01530.1	0.269723	2.45964	0.10966
	DlMYB87	AT3G27810.1	0.224146	3.0309	0.0739536
	DlMYB87	AT5G40350.1	0.233433	1.63246	0.142995
	DlMYB88	AT3G27920.1	0.396405	1.60127	0.247557
	DlMYB88	AT5G14750.1	0.283903	3.49054	0.0813349
	DlMYB88	AT5G40330.1	0.380258	2.58352	0.147186
	DlMYB91	AT5G58850.1	0.559929	2.59682	0.215621
	DlMYB92	AT2G36890.1	0.44337	1.5532	0.285455
	DlMYB92	AT5G23000.1	0.646427	2.39667	0.269719
	DlMYB93	AT3G13540.1	0.312058	3.10258	0.10058
	DlMYB94	AT5G12870.1	0.368955	3.53891	0.104257
	DlMYB96	AT3G28470.1	0.386681	1.92449	0.200927
	DlMYB96	AT5G15310.1	0.64822	2.27179	0.285335
	DlMYB97	AT3G09230.1	0.35679	3.10218	0.115013
	DlMYB97	AT3G55730.1	0.483286	2.88432	0.167556
	DlMYB98	AT2G37630.1	0.131858	3.99215	0.0330295
	DlMYB99	AT2G36890.1	0.411816	2.00988	0.204896
Dimocarpus longan - Litchi chinensis	DlMYB100	LITCHI018670.m1	0.0985314	0.0554426	1.77718
	DlMYB101	LITCHI019273.m1	0.0129361	0.0695455	0.186009
	DlMYB102	LITCHI019331.m1	0.0382663	0.0698637	0.547727
	DlMYB103	LITCHI005214.m1	0.283047	3.5355	0.0800588
	DlMYB103	LITCHI019503.m1	0.0104383	0.0711719	0.146663
	DlMYB104	LITCHI005190.m1	0.521461	1.86612	0.279437
	DlMYB104	LITCHI019516.m1	0.0319588	0.0777891	0.410839
	DlMYB105	LITCHI019543.m1	0.0334304	0.0743559	0.4496
	DlMYB106	LITCHI021911.m1	0.0482212	0.120102	0.401503
	DlMYB106	LITCHI026844.m1	0.377589	1.91815	0.19685
	DlMYB107	LITCHI021912.m1	0.0852925	0.229884	0.371024
	DlMYB108	LITCHI022043.m1	0.00301657	0.0494217	0.0610372
	DlMYB109	LITCHI017937.m1	0.447148	2.12351	0.21057
	DlMYB109	LITCHI022244.m1	0.0335925	0.0790419	0.424996
	DlMYB10	LITCHI016588.m1	0.018822	0.07832	0.240322
	DlMYB110	LITCHI004944.m1	0.34456	3.58181	0.0961973
	DlMYB110	LITCHI020533.m1	0.3432	3.70144	0.0927208
	DlMYB110	LITCHI022379.m1	0.0577981	0.104921	0.550873
	DlMYB111	LITCHI020554.m1	0.567751	2.97565	0.190799
	DlMYB112	LITCHI022468.m1	0.0144099	0.0602643	0.239111
	DlMYB113	LITCHI022766.m1	0.0646618	0.106656	0.606264
	DlMYB114	LITCHI009134.m1	0.311565	1.96131	0.158856
	DlMYB114	LITCHI022841.m1	0.0186755	0.0798635	0.233843
	DlMYB115	LITCHI023106.m1	0.0238616	0.0768439	0.31052
	DlMYB116	LITCHI005562.m1	0.466201	1.83394	0.254207
	DlMYB116	LITCHI023176.m1	0.018951	0.0841886	0.225102
	DlMYB117	LITCHI019543.m1	0.299924	1.74132	0.172239
	DlMYB117	LITCHI023435.m1	0.0188352	0.0846398	0.222533
	DlMYB118	LITCHI023475.m1	0.0170088	0.0477013	0.356569
	DlMYB119	LITCHI023507.m1	0.0375242	0.0647468	0.579553
	DlMYB11	LITCHI016377.m1	0.0407493	0.063836	0.638343
	DlMYB12	LITCHI016344.m1	0.0251709	0.0719684	0.349749
	DlMYB13	LITCHI003584.m1	0.466012	2.94675	0.158144
	DlMYB13	LITCHI015318.m1	0.0142527	0.0702583	0.202862
	DlMYB14	LITCHI015187.m1	0.018001	0.128081	0.140544
	DlMYB15	LITCHI015187.m1	0.018001	0.128081	0.140544
	DlMYB16	LITCHI014298.m1	0.0219442	0.0797175	0.275274
	DlMYB17	LITCHI013257.m1	0.0413822	0.0764466	0.541322
	DlMYB18	LITCHI013946.m1	0.269058	0.544258	0.494357
	DlMYB18	LITCHI021301.m1	0.514987	2.35926	0.218284
	DlMYB19	LITCHI013621.m1	0.0104233	0.0839577	0.124149
	DlMYB1	LITCHI017385.m1	0.277411	2.75925	0.100539
	DlMYB1	LITCHI017552.m1	0.119369	0.328098	0.363822
	DlMYB1	LITCHI030248.m2	0.298377	3.56235	0.0837586
	DlMYB20	LITCHI013621.m1	0.0119697	0.0833487	0.14361
	DlMYB22	LITCHI017552.m1	0.573917	2.28229	0.251465
	DlMYB22	LITCHI030247.m1	0.18785	0.202889	0.925876
	DlMYB23	LITCHI030248.m2	0.260467	0.687177	0.379039
	DlMYB24	LITCHI017391.m1	0.222274	1.81413	0.122524
	DlMYB24	LITCHI030250.m1	0.0192507	0.0482229	0.399203
	DlMYB25	LITCHI017386.m1	0.429843	3.39862	0.126476
	DlMYB25	LITCHI030250.m1	0.0195891	0.0402457	0.486738
	DlMYB26	LITCHI030130.m1	0.0221231	0.136775	0.161748
	DlMYB28	LITCHI025391.m1	0.0138196	0.070794	0.195209
	DlMYB2	LITCHI017386.m1	0.625057	2.42459	0.257799
	DlMYB30	LITCHI009335.m1	0.461157	2.71479	0.169869
	DlMYB30	LITCHI025698.m3	0.004459	0.0722153	0.061746
	DlMYB31	LITCHI003584.m1	0.21387	1.45634	0.146855
	DlMYB31	LITCHI015318.m1	0.180392	1.98335	0.0909533
	DlMYB32	LITCHI014405.m1	0.55724	2.77205	0.201021
	DlMYB32	LITCHI026531.m1	0.0480442	0.0401274	1.19729
	DlMYB33	LITCHI026620.m1	0.00589502	0.0800846	0.07361
	DlMYB34	LITCHI026705.m1	0.0172429	0.0493009	0.349748
	DlMYB35	LITCHI026844.m1	0.0188371	0.0517491	0.364009
	DlMYB36	LITCHI027373.m1	0.0268667	0.187992	0.142914
	DlMYB37	LITCHI002253.m1	0.0198512	0.0614801	0.322888
	DlMYB39	LITCHI003293.m1	0.0131936	0.060311	0.218759
	DlMYB40	LITCHI003300.m1	0.0336315	0.0496712	0.677082
	DlMYB41	LITCHI003359.m1	0.0204462	0.0776599	0.263279
	DlMYB42	LITCHI002019.m1	0.547784	2.72689	0.200882
	DlMYB42	LITCHI006440.m1	0.0250065	0.0714616	0.34993
	DlMYB43	LITCHI001536.m1	0.220877	4.31417	0.0511981
	DlMYB44	LITCHI007121.m1	0.0387943	0.039987	0.970172
	DlMYB46	LITCHI007339.m1	0.034909	0.0483267	0.722354
	DlMYB47	LITCHI008001.m1	0.0189066	0.0845187	0.223697
	DlMYB48	LITCHI028489.m1	0.0274124	0.052113	0.526019
	DlMYB49	LITCHI021137.m1	0.328469	3.31288	0.0991492
	DlMYB49	LITCHI029324.m1	0.0248499	0.0311287	0.798294
	DlMYB50	LITCHI021143.m1	0.563227	2.20727	0.255169
	DlMYB50	LITCHI029337.m2	0.0341028	0.0471979	0.722548
	DlMYB52	LITCHI008189.m1	0.0368019	0.0597982	0.615435
	DlMYB55	LITCHI008193.m1	0.115117	0.271057	0.424695
	DlMYB56	LITCHI008251.m1	0.0304315	0.114163	0.266561
	DlMYB57	LITCHI009134.m1	0.033592	0.0578721	0.580452
	DlMYB57	LITCHI022841.m1	0.338317	2.24647	0.1506
	DlMYB58	LITCHI009335.m1	0.0332891	0.0841281	0.395695
	DlMYB59	LITCHI025698.m3	0.463577	2.73149	0.169716
	DlMYB5	LITCHI017385.m1	0.510606	2.7806	0.183632
	DlMYB5	LITCHI017552.m1	0.417127	3.06313	0.136177
	DlMYB60	LITCHI009699.m1	0.0458895	0.117915	0.389175
	DlMYB61	LITCHI009777.m1	0.00902494	0.0637731	0.141516
	DlMYB62	LITCHI010515.m1	0.0150127	0.0753604	0.199212
	DlMYB66	LITCHI007121.m1	0.354253	2.69164	0.131613
	DlMYB67	LITCHI001536.m1	0.390855	2.87128	0.136126
	DlMYB67	LITCHI006946.m1	0.281911	3.46044	0.0814667
	DlMYB67	LITCHI010915.m1	0.0214356	0.101205	0.211804
	DlMYB69	LITCHI011342.m1	0.0168055	0.0663053	0.253457
	DlMYB70	LITCHI011655.m1	0.0348044	0.0701377	0.49623
	DlMYB72	LITCHI005562.m1	0.0258545	0.0788893	0.327732
	DlMYB72	LITCHI023176.m1	0.457392	3.20063	0.142907
	DlMYB73	LITCHI005214.m1	0.0299002	0.0732828	0.408011
	DlMYB73	LITCHI019503.m1	0.313324	3.32656	0.0941886
	DlMYB74	LITCHI005190.m1	0.0296198	0.0538482	0.55006
	DlMYB74	LITCHI019516.m1	0.615657	2.12154	0.290194
	DlMYB75	LITCHI005142.m2	0.0165787	0.0640302	0.25892
	DlMYB76	LITCHI004944.m1	0.0189564	0.057091	0.332039
	DlMYB76	LITCHI020533.m1	0.402433	3.02745	0.132928
	DlMYB76	LITCHI022379.m1	0.352301	3.07227	0.114671
	DlMYB77	LITCHI004385.m1	0.0130166	0.0621129	0.209563
	DlMYB77	LITCHI023952.m1	0.414758	2.68495	0.154475
	DlMYB78	LITCHI001536.m1	0.0508085	0.0995066	0.510604
	DlMYB78	LITCHI006946.m1	0.45411	3.04374	0.149195
	DlMYB78	LITCHI010915.m1	0.410111	2.33793	0.175416
	DlMYB79	LITCHI002019.m1	0.00469969	0.100968	0.0465463
	DlMYB80	LITCHI013946.m1	0.71517	1.96187	0.364536
	DlMYB80	LITCHI021301.m1	0.017997	0.0706705	0.254661
	DlMYB81	LITCHI021142.m1	0.436139	3.11629	0.139954
	DlMYB81	LITCHI029337.m2	0.56059	2.50743	0.223572
	DlMYB83	LITCHI021137.m1	0.0161299	0.0729741	0.221036
	DlMYB83	LITCHI029324.m1	0.287819	2.59411	0.110951
	DlMYB84	LITCHI020672.m1	0.0188515	0.0539407	0.349486
	DlMYB85	LITCHI020553.m1	0.320044	0.541889	0.590607
	DlMYB85	LITCHI022403.m1	0.707251	2.19784	0.321793
	DlMYB87	LITCHI020546.m1	0.00444988	0.0985848	0.0451375
	DlMYB88	LITCHI004944.m1	0.449641	3.14225	0.143095
	DlMYB88	LITCHI020533.m1	0.0241742	0.0572504	0.422255
	DlMYB88	LITCHI022379.m1	0.325714	3.76212	0.0865772
	DlMYB89	LITCHI020471.m1	0.0285624	0.0382142	0.747429
	DlMYB8	LITCHI017241.m1	0.0458395	0.0756292	0.606109
	DlMYB8	LITCHI017696.m1	0.513341	2.63706	0.194664
	DlMYB90	LITCHI019748.m1	0.0499939	0.127359	0.392543
	DlMYB91	LITCHI025088.m1	0.0414381	0.0724786	0.571728
	DlMYB92	LITCHI018648.m1	0.329505	1.4556	0.226371
	DlMYB92	LITCHI024606.m1	0.0128786	0.0691762	0.186171
	DlMYB93	LITCHI024273.m1	0.0233532	0.0972855	0.240049
	DlMYB94	LITCHI023952.m1	0.0348965	0.0788826	0.442386
	DlMYB96	LITCHI017937.m1	0.0282372	0.0857101	0.32945
	DlMYB97	LITCHI018292.m1	0.0354268	0.0777162	0.455848
	DlMYB97	LITCHI027606.m1	0.351598	2.0272	0.17344
	DlMYB98	LITCHI018409.m1	0.0139095	0.0445176	0.312449
	DlMYB99	LITCHI018648.m1	0.0373136	0.0598494	0.623458
	DlMYB99	LITCHI024606.m1	0.354318	1.78636	0.198347
	DlMYB9	LITCHI016823.m1	0.10236	0.121561	0.842046
Dimocarpus longan - Xanthoceras sorbifolium	DlMYB100	EVM0020145.1	0.168702	0.181063	0.931733
	DlMYB101	EVM0000910.1	0.0762295	0.836337	0.0911468
	DlMYB102	EVM0022504.1	0.11458	0.342149	0.334882
	DlMYB103	EVM0000102.1	0.0467393	0.319565	0.146259
	DlMYB103	EVM0003200.1	0.25196	3.34736	0.0752711
	DlMYB104	EVM0015593.1	0.469351	2.05061	0.228884
	DlMYB104	EVM0022378.1	0.116926	0.300981	0.388483
	DlMYB105	EVM0011728.1	0.103498	0.400215	0.258605
	DlMYB105	EVM0016904.1	0.109284	0.435623	0.250869
	DlMYB106	EVM0001724.1	0.396673	2.20754	0.17969
	DlMYB106	EVM0019111.1	0.372537	2.14519	0.173661
	DlMYB108	EVM0013475.1	0.0169085	0.239357	0.0706412
	DlMYB109	EVM0007216.1	0.103965	0.388612	0.26753
	DlMYB10	EVM0015472.1	0.13447	0.34864	0.385698
	DlMYB110	EVM0008563.1	0.434074	2.36992	0.18316
	DlMYB110	EVM0013661.1	0.1218	0.512507	0.237655
	DlMYB110	EVM0021823.1	0.454982	2.5379	0.179275
	DlMYB111	EVM0005943.1	0.534496	2.73401	0.195499
	DlMYB112	EVM0001991.1	0.0414992	0.319158	0.130027
	DlMYB114	EVM0014621.1	0.320893	3.26233	0.0983629
	DlMYB114	EVM0020849.1	0.0420668	0.272483	0.154383
	DlMYB116	EVM0002409.1	0.0726128	0.287925	0.252194
	DlMYB117	EVM0000102.1	0.520383	2.76116	0.188465
	DlMYB117	EVM0011728.1	0.284427	1.75118	0.162421
	DlMYB117	EVM0013599.1	0.0625867	0.379642	0.164857
	DlMYB118	EVM0000217.1	0.0452721	0.270086	0.167621
	DlMYB12	EVM0023846.1	0.0735549	0.263988	0.27863
	DlMYB13	EVM0012697.1	0.0915601	0.296319	0.308992
	DlMYB13	EVM0017196.1	0.333887	2.10745	0.158432
	DlMYB14	EVM0001665.1	0.0493351	0.275554	0.17904
	DlMYB15	EVM0001665.1	0.0493351	0.275554	0.17904
	DlMYB16	EVM0019497.1	0.0885887	0.417571	0.212153
	DlMYB16	EVM0020172.1	0.356944	3.1273	0.114138
	DlMYB17	EVM0001812.1	0.100915	0.324899	0.310603
	DlMYB18	EVM0014122.1	0.497488	2.33794	0.212789
	DlMYB18	EVM0020792.1	0.268581	0.83483	0.321719
	DlMYB19	EVM0016592.1	0.0345591	0.295929	0.116781
	DlMYB1	EVM0003265.1	0.27737	1.99697	0.138895
	DlMYB1	EVM0015871.1	0.156078	0.552153	0.282672
	DlMYB20	EVM0016592.1	0.0361827	0.29188	0.123964
	DlMYB21	EVM0001915.1	0.310596	0.831053	0.373738
	DlMYB22	EVM0015871.1	0.510609	2.96718	0.172085
	DlMYB24	EVM0002142.1	0.428678	2.95062	0.145284
	DlMYB26	EVM0014810.1	0.113762	0.433199	0.26261
	DlMYB28	EVM0006430.1	0.0769388	0.283169	0.271706
	DlMYB30	EVM0015631.1	0.0224293	0.334232	0.0671069
	DlMYB30	EVM0018203.1	0.419125	2.97246	0.141003
	DlMYB31	EVM0000751.1	0.208042	2.19773	0.0946624
	DlMYB31	EVM0012697.1	0.238941	2.1545	0.110903
	DlMYB32	EVM0005064.1	0.12282	0.38263	0.32099
	DlMYB32	EVM0015447.1	0.65596	2.10204	0.312059
	DlMYB33	EVM0020172.1	0.070738	0.247151	0.286214
	DlMYB34	EVM0018933.1	0.0452304	0.217038	0.208398
	DlMYB34	EVM0024336.1	0.356154	1.44209	0.246972
	DlMYB35	EVM0001724.1	0.0446885	0.289448	0.154392
	DlMYB35	EVM0019111.1	0.383492	2.96069	0.129528
	DlMYB36	EVM0009985.1	0.0794713	0.673458	0.118005
	DlMYB37	EVM0024336.1	0.0638886	0.368771	0.173247
	DlMYB39	EVM0006466.1	0.0387505	0.290914	0.133203
	DlMYB40	EVM0020814.1	0.102441	0.286166	0.357979
	DlMYB41	EVM0016752.1	0.0799604	0.528502	0.151296
	DlMYB42	EVM0019225.1	0.561875	2.62198	0.214294
	DlMYB43	EVM0014204.1	0.235337	3.87249	0.0607715
	DlMYB44	EVM0000810.1	0.0992149	0.268703	0.369236
	DlMYB44	EVM0019643.1	0.348218	3.25212	0.107074
	DlMYB47	EVM0007066.1	0.051585	0.226194	0.228056
	DlMYB48	EVM0010076.1	0.144279	0.397028	0.363398
	DlMYB48	EVM0023539.1	0.139997	0.327681	0.427237
	DlMYB49	EVM0001258.1	0.0521188	0.371473	0.140303
	DlMYB49	EVM0001812.1	0.390202	2.95489	0.132053
	DlMYB49	EVM0004024.1	0.281586	2.28085	0.123457
	DlMYB4	EVM0002142.1	0.548102	2.76028	0.198568
	DlMYB4	EVM0017702.1	0.0575437	0.151152	0.380701
	DlMYB50	EVM0002285.1	0.577829	2.56746	0.225058
	DlMYB50	EVM0011396.1	0.223124	0.352921	0.632221
	DlMYB51	EVM0018212.1	0.116404	0.307187	0.378936
	DlMYB52	EVM0022315.1	0.42836	2.0184	0.212228
	DlMYB56	EVM0016152.1	0.201194	0.589219	0.341459
	DlMYB56	EVM0023819.1	0.256664	2.80551	0.0914855
	DlMYB57	EVM0014621.1	0.111954	0.447429	0.250216
	DlMYB57	EVM0020849.1	0.352222	3.65513	0.0963637
	DlMYB58	EVM0010732.1	0.068932	0.264674	0.260441
	DlMYB59	EVM0015631.1	0.410143	3.08567	0.132919
	DlMYB59	EVM0018203.1	0.172769	0.43404	0.39805
	DlMYB5	EVM0015871.1	0.478977	1.81966	0.263223
	DlMYB5	EVM0023961.1	0.105792	0.4543	0.232869
	DlMYB60	EVM0014364.1	0.170697	0.626602	0.272417
	DlMYB61	EVM0012430.1	0.0893132	0.225563	0.395957
	DlMYB62	EVM0024537.1	0.0485304	0.145306	0.333988
	DlMYB66	EVM0000810.1	0.336474	3.41274	0.0985933
	DlMYB66	EVM0019643.1	0.0548954	0.26091	0.2104
	DlMYB67	EVM0009794.1	0.248847	2.69345	0.0923896
	DlMYB67	EVM0014204.1	0.412077	2.30503	0.178773
	DlMYB67	EVM0016229.1	0.0527645	0.451516	0.116861
	DlMYB68	EVM0013951.1	0.0776987	0.708803	0.10962
	DlMYB69	EVM0006170.1	0.072437	0.3689	0.19636
	DlMYB6	EVM0006354.1	0.167607	0.303865	0.551584
	DlMYB6	EVM0013115.1	0.152552	0.283654	0.537811
	DlMYB70	EVM0001601.1	0.0880654	0.363466	0.242293
	DlMYB70	EVM0020954.1	0.0899959	0.356007	0.252792
	DlMYB71	EVM0016152.1	0.224061	1.81779	0.12326
	DlMYB71	EVM0023819.1	0.076672	0.503235	0.152358
	DlMYB72	EVM0002409.1	0.469311	2.66325	0.176218
	DlMYB72	EVM0020929.1	0.0972885	0.475756	0.204492
	DlMYB72	EVM0021629.1	0.0988089	0.474909	0.208059
	DlMYB73	EVM0000102.1	0.312147	3.96343	0.0787566
	DlMYB73	EVM0003200.1	0.0816177	0.313539	0.260311
	DlMYB74	EVM0015593.1	0.0904685	0.285949	0.31638
	DlMYB74	EVM0022378.1	0.539747	1.70673	0.316247
	DlMYB75	EVM0015787.1	0.0633027	0.182955	0.346002
	DlMYB76	EVM0008563.1	0.438095	2.82544	0.155054
	DlMYB76	EVM0013661.1	0.410016	2.85568	0.143579
	DlMYB76	EVM0021823.1	0.0983122	0.189363	0.519172
	DlMYB77	EVM0007748.1	0.0721393	0.300741	0.239872
	DlMYB77	EVM0016796.1	0.36449	2.09453	0.17402
	DlMYB78	EVM0009794.1	0.388284	3.25176	0.119407
	DlMYB78	EVM0014204.1	0.172957	0.465686	0.371402
	DlMYB78	EVM0016229.1	0.410437	1.68917	0.242981
	DlMYB79	EVM0019225.1	0.100508	0.586031	0.171506
	DlMYB7	EVM0003265.1	0.0918274	0.241719	0.379894
	DlMYB80	EVM0014122.1	0.0766648	0.239588	0.319986
	DlMYB80	EVM0020792.1	0.67188	1.99139	0.337393
	DlMYB81	EVM0003034.1	0.514878	2.62016	0.196507
	DlMYB83	EVM0001258.1	0.281028	3.5697	0.0787259
	DlMYB83	EVM0004024.1	0.0463167	0.278964	0.166031
	DlMYB84	EVM0013644.1	0.0720635	0.365502	0.197163
	DlMYB85	EVM0000940.1	0.700288	2.36227	0.296447
	DlMYB85	EVM0014150.1	0.311512	0.499421	0.623746
	DlMYB87	EVM0004445.1	0.0268963	0.28449	0.094542
	DlMYB88	EVM0008563.1	0.0909775	0.349163	0.260559
	DlMYB88	EVM0011983.1	0.0933961	0.350025	0.266827
	DlMYB88	EVM0013661.1	0.361015	3.25845	0.110793
	DlMYB88	EVM0021823.1	0.364717	3.00727	0.121278
	DlMYB89	EVM0006106.1	0.054597	0.353886	0.154278
	DlMYB8	EVM0002450.1	0.407385	1.81034	0.225032
	DlMYB8	EVM0004110.1	0.241554	0.550345	0.438915
	DlMYB92	EVM0016739.1	0.0669456	0.208166	0.321598
	DlMYB92	EVM0023233.1	0.367937	1.65893	0.221791
	DlMYB93	EVM0008271.1	0.173483	0.631231	0.274832
	DlMYB94	EVM0016796.1	0.0827003	0.302518	0.273374
	DlMYB96	EVM0015973.1	0.0835879	0.346267	0.241398
	DlMYB97	EVM0003121.1	0.313797	2.43966	0.128623
	DlMYB97	EVM0016804.1	0.0814228	0.338621	0.240454
	DlMYB98	EVM0004291.1	0.0394511	0.240411	0.164098
	DlMYB98	EVM0018202.1	0.0393764	0.235708	0.167056
	DlMYB99	EVM0016739.1	0.291874	1.31867	0.221339
	DlMYB99	EVM0023233.1	0.101208	0.351273	0.288118
	DlMYB9	EVM0013635.1	0.122137	0.459821	0.265619
Dimocarpus longan - Oryza sativa	DlMYB12	EE612_043099	0.398044	3.12079	0.127546
	DlMYB13	EE612_051875	0.396338	3.21251	0.123373
	DlMYB14	EE612_012421	0.395594	3.4242	0.115529
	DlMYB26	EE612_005283	0.516701	2.56222	0.201662
	DlMYB31	EE612_051875	0.304151	3.45719	0.0879765
	DlMYB32	EE612_002036	0.426674	3.05772	0.13954
	DlMYB34	EE612_001879	0.412272	2.92161	0.141111
	DlMYB34	EE612_026990	0.394096	2.91157	0.135355
	DlMYB42	EE612_049198	0.525892	2.73937	0.191975
	DlMYB49	EE612_039997	0.404601	3.18899	0.126874
	DlMYB62	EE612_032759	0.39266	2.44271	0.160747
	DlMYB65	EE612_017791	0.577748	2.21612	0.260702
	DlMYB78	EE612_035553	0.463083	3.28184	0.141105
	DlMYB79	EE612_049198	0.242725	3.79854	0.0638995
	DlMYB87	EE612_004571	0.404108	3.54417	0.11402
	DlMYB91	EE612_006900	0.792347	1.73114	0.457702
	DlMYB97	EE612_006844	0.528523	2.52687	0.209161
Dimocarpus longan - Zea mays	DlMYB26	XM_023301886.2	0.519114	2.46844	0.210301
	DlMYB28	XM_020545522.3	0.535694	2.5899	0.20684
	DlMYB31	XM_008670966.4	0.212378	4.20361	0.0505228
	DlMYB31	XM_020538288.1	0.282002	4.0453	0.0697111
	DlMYB32	XM_035963466.1	0.411202	3.31172	0.124166
	DlMYB33	XM_008664697.4	0.486969	2.91766	0.166904
	DlMYB42	XM_035961213.1	0.498105	3.01853	0.165015
	DlMYB44	XM_020546975.1	0.439385	2.864	0.153417
	DlMYB49	XM_008655002.3	0.437422	3.22906	0.135464
	DlMYB49	XM_008672267.3	0.437299	3.3181	0.131792
	DlMYB66	XM_020546975.1	0.462625	2.80986	0.164643
	DlMYB79	XM_008666378.4	0.227154	3.70505	0.0613094
	DlMYB79	XM_035961213.1	0.155567	4.16812	0.037323
	DlMYB79	XM_035964451.1	0.293128	3.77556	0.0776384
	DlMYB83	XM_008655002.3	0.41927	3.12141	0.134321
	DlMYB16	NM_001146925.1	0.404961	3.42389	0.118275
	DlMYB31	NM_001371681.1	0.229142	3.68287	0.0622183
	DlMYB33	NM_001148419.1	0.426628	3.23122	0.132033
	DlMYB34	NM_001138598.1	0.422352	2.8586	0.147748
	DlMYB34	NM_001153629.1	0.44403	2.75646	0.161087
	DlMYB58	NM_001146928.1	0.499803	3.0913	0.16168
	DlMYB59	NM_001371829.1	0.452692	2.92038	0.155012
	DlMYB62	NM_001176946.1	0.345768	3.02224	0.114408
	DlMYB79	NM_001112539.2	0.280538	3.60732	0.077769
	DlMYB97	NM_001148147.2	0.522076	2.45135	0.212975

## Sheet: Table S10
Table S10. One-to-one orthologous relationships between Dimocarpus longan and other five plant species
Common collinear DlMYB gene pairs in rice and maize	Common collinear DlMYB gene pairs in lichi, yellow horn and Arabidopsis	Common collinear DlMYB gene pairs in lichi, yellow horn, Arabidopsis, rice, and maize	Common collinear DlMYB gene pairs in litchi, and yellow horn
DlMYB26	DlMYB15	DlMYB26	DlMYB1
DlMYB31	DlMYB17	DlMYB31	DlMYB5
DlMYB32	DlMYB18	DlMYB32	DlMYB8
DlMYB34	DlMYB19	DlMYB34	DlMYB9
DlMYB42	DlMYB30	DlMYB42	DlMYB10
DlMYB49	DlMYB36	DlMYB49	DlMYB20
DlMYB62	DlMYB37	DlMYB62	DlMYB22
DlMYB79	DlMYB40	DlMYB79	DlMYB24
DlMYB97	DlMYB47	DlMYB97	DlMYB35
	DlMYB52		DlMYB39
	DlMYB57		DlMYB41
	DlMYB60		DlMYB43
	DlMYB61		DlMYB48
	DlMYB67		DlMYB50
	DlMYB70		DlMYB56
	DlMYB72		DlMYB69
	DlMYB74		DlMYB73
	DlMYB75		DlMYB76
	DlMYB77		DlMYB81
	DlMYB80		DlMYB89
	DlMYB84		DlMYB101
	DlMYB85		DlMYB102
	DlMYB88		DlMYB106
	DlMYB92		DlMYB109
	DlMYB93		DlMYB112
	DlMYB94		DlMYB118
	DlMYB96
	DlMYB98
	DlMYB99
	DlMYB100
	DlMYB103
	DlMYB104
	DlMYB105
	DlMYB108
	DlMYB110
	DlMYB111
	DlMYB114
	DlMYB116
	DlMYB117

[truncated: 5 more sheets: Table S11, Table S12, Table S13, Table S14, Table S15]
